# Supplementary material
Source: PubMed Central journal article supplement (PMC3170525)
Supplement: NIHMS140314-supplement-1.pdf [file NIHMS140314-supplement-1.pdf]

Supplemental Table 1. Histopathology of lung cancer among never smokers

| Study                                  | Design/population                                                                                                                                                                                        | Histology                                     | Number of Cases among Never Smokers | Percent of Total Lung Cancer Cases among Never Smokers |
|----------------------------------------|----------------------------------------------------------------------------------------------------------------------------------------------------------------------------------------------------------|-----------------------------------------------|-------------------------------------|--------------------------------------------------------|
| Lam <i>et al.</i> (1987) (S1)          | Case-control:<br>202 female lung cancer cases (never smokers)<br>Study location: Hong Kong<br>Study years: 1983-1986                                                                                     | Adenocarcinoma                                | 131                                 | 65%                                                    |
|                                        |                                                                                                                                                                                                          | Large cell                                    | 9                                   | 4%                                                     |
|                                        |                                                                                                                                                                                                          | Small cell                                    | 9                                   | 4%                                                     |
|                                        |                                                                                                                                                                                                          | Squamous cell                                 | 28                                  | 14%                                                    |
|                                        |                                                                                                                                                                                                          | Others and unclassified                       | 25                                  | 12%                                                    |
| Anton-Culver <i>et al.</i> (1988) (S2) | Cross-sectional:<br>919 male and female lung cancer cases (59 never smokers)<br>Study location: USA (CA)<br>Study year: 1984                                                                             | <u>Males (23 cases):</u>                      |                                     |                                                        |
|                                        |                                                                                                                                                                                                          | Adenocarcinoma                                | 2                                   | 9%                                                     |
|                                        |                                                                                                                                                                                                          | Large cell                                    | 1                                   | 4%                                                     |
|                                        |                                                                                                                                                                                                          | Small cell                                    | 6                                   | 26%                                                    |
|                                        |                                                                                                                                                                                                          | Squamous cell                                 | 6                                   | 26%                                                    |
|                                        |                                                                                                                                                                                                          | Other                                         | 0                                   | 0                                                      |
|                                        |                                                                                                                                                                                                          | Carcinoma or neoplasm not otherwise specified | 8                                   | 35%                                                    |
|                                        |                                                                                                                                                                                                          | <u>Females (36 cases):</u>                    |                                     |                                                        |
|                                        |                                                                                                                                                                                                          | Adenocarcinoma                                | 18                                  | 50%                                                    |
|                                        |                                                                                                                                                                                                          | Large cell                                    | 3                                   | 8%                                                     |
|                                        |                                                                                                                                                                                                          | Small cell                                    | 1                                   | 3%                                                     |
|                                        |                                                                                                                                                                                                          | Squamous cell                                 | 5                                   | 14%                                                    |
|                                        |                                                                                                                                                                                                          | Other                                         | 0                                   | 0                                                      |
|                                        |                                                                                                                                                                                                          | Carcinoma not otherwise specified             | 9                                   | 25%                                                    |
| Lam <i>et al.</i> (2001) (S3)          | Cross-sectional:<br>243 male and female adenocarcinoma and squamous cell lung cancer cases (70 never smokers)<br>Study location: Hong Kong<br>Study years: 1995-1997                                     | Adenocarcinoma                                | 51                                  | 73%                                                    |
|                                        |                                                                                                                                                                                                          | Squamous cell                                 | 19                                  | 27%                                                    |
|                                        |                                                                                                                                                                                                          |                                               |                                     |                                                        |
| Radzikowska <i>et al.</i> (2002) (S4)  | Cross-sectional:<br>20561 male and female lung cancer cases (738 never smokers)<br>Study location: Poland<br>Study years: 1995-1998                                                                      | <u>Males (229 cases):</u>                     |                                     |                                                        |
|                                        |                                                                                                                                                                                                          | Adenocarcinoma                                | 64                                  | 30%                                                    |
|                                        |                                                                                                                                                                                                          | Small cell                                    | 36                                  | 16%                                                    |
|                                        |                                                                                                                                                                                                          | Squamous cell                                 | 129                                 | 56%                                                    |
|                                        |                                                                                                                                                                                                          | <u>Females (205 cases):</u>                   |                                     |                                                        |
|                                        |                                                                                                                                                                                                          | Adenocarcinoma                                | 89                                  | 43%                                                    |
|                                        |                                                                                                                                                                                                          | Small cell                                    | 45                                  | 22%                                                    |
| Squamous cell                          | 71                                                                                                                                                                                                       | 35%                                           |                                     |                                                        |
| Yun <i>et al.</i> (2005) (S5)          | Cohort study:<br>437976 men enrolled in the National Health Insurance Cooperation (99477 never smokers)<br>1357 lung cancer cases (110 never smokers)<br>Study location: Korea<br>Study years: 1996-2002 | Adenocarcinoma                                | 69                                  | 63%                                                    |
|                                        |                                                                                                                                                                                                          | Small cell                                    | 4                                   | 4%                                                     |
|                                        |                                                                                                                                                                                                          | Squamous cell                                 | 16                                  | 15%                                                    |
|                                        |                                                                                                                                                                                                          | Other                                         | 21                                  | 19%                                                    |

|                                      |                                                                                                                                                         |                                      |    |     |
|--------------------------------------|---------------------------------------------------------------------------------------------------------------------------------------------------------|--------------------------------------|----|-----|
| Liam <i>et al.</i><br>(2006) (S6)    | Cross-sectional:<br>861 male and female lung<br>cancer cases (195 never<br>smokers)<br>Study location: Malaysia<br>Study years: 1967-1976;<br>1991-1999 | <u>Males 1967-1976 (22 cases):</u>   |    |     |
|                                      |                                                                                                                                                         | Adenocarcinoma                       | 11 | 50% |
|                                      |                                                                                                                                                         | Large cell                           | 4  | 18% |
|                                      |                                                                                                                                                         | Small cell                           | 1  | 5%  |
|                                      |                                                                                                                                                         | Squamous cell                        | 6  | 27% |
|                                      |                                                                                                                                                         | <u>Males 1991-1999 (28 cases):</u>   |    |     |
|                                      |                                                                                                                                                         | Adenocarcinoma                       | 22 | 79% |
|                                      |                                                                                                                                                         | Large cell                           | 1  | 4%  |
|                                      |                                                                                                                                                         | Small cell                           | 1  | 4%  |
|                                      |                                                                                                                                                         | Squamous cell                        | 4  | 14% |
|                                      |                                                                                                                                                         | <u>Females 1967-1976 (31 cases):</u> |    |     |
|                                      |                                                                                                                                                         | Adenocarcinoma                       | 16 | 52% |
|                                      |                                                                                                                                                         | Large cell                           | 5  | 16% |
|                                      |                                                                                                                                                         | Small cell                           | 2  | 6%  |
| Squamous cell                        | 8                                                                                                                                                       | 26%                                  |    |     |
| <u>Females 1991-1999 (77 cases):</u> |                                                                                                                                                         |                                      |    |     |
| Adenocarcinoma                       | 67                                                                                                                                                      | 87%                                  |    |     |
| Large cell                           | 2                                                                                                                                                       | 3%                                   |    |     |
| Small cell                           | 0                                                                                                                                                       | 0                                    |    |     |
| Squamous cell                        | 8                                                                                                                                                       | 10%                                  |    |     |

Supplemental Table 2: Results of studies on exposure to smoke from coal and biomass and risk of lung cancer among never smokers

| Study                         | Design/population                                                                                                                                                              | Exposure Group                            | Reference Group                      | Risk Estimate (95% CI)                          | Adjustment Variables                                                                                                               |
|-------------------------------|--------------------------------------------------------------------------------------------------------------------------------------------------------------------------------|-------------------------------------------|--------------------------------------|-------------------------------------------------|------------------------------------------------------------------------------------------------------------------------------------|
| <i>Coal:</i>                  |                                                                                                                                                                                |                                           |                                      |                                                 |                                                                                                                                    |
| Lan <i>et al.</i> (1993) (S7) | Case-control:<br>139 female lung cancer cases (nonsmokers)<br>139 female population controls (nonsmokers)<br>Study location: China (Xuanwei)<br>Study years: 1988-1990         | Ever used smoky coal                      | vs. Never used smoky coal            | 7.53 (3.31-17.17)                               | age, menstrual cycle length, age of menopause, family history of lung cancer, history of chronic bronchitis                        |
|                               |                                                                                                                                                                                | Lifetime use of smoky coal                | vs. Never used smoky coal            | 9.89 (3.95-24.75)                               | age, menstrual cycle length, age of menopause, family history of lung cancer, history of chronic bronchitis                        |
|                               |                                                                                                                                                                                | Use <3 tons of smoky coal per year        | vs. Never used smoky coal            | 8.24 (2.33-29.17)                               | age, menstrual cycle length, age of menopause, family history of lung cancer, history of chronic bronchitis                        |
|                               |                                                                                                                                                                                | Use >3 tons of smoky coal per year        | vs. Never used smoky coal            | 7.53 (3.03-18.72)<br>$P_{\text{trend}} < 0.001$ | age, menstrual cycle length, age of menopause, family history of lung cancer, history of chronic bronchitis                        |
|                               |                                                                                                                                                                                | Used smoky coal after 20 years old        | vs. Never used smoky coal            | 1.84 (0.56-6.05)                                | age, menstrual cycle length, age of menopause, family history of lung cancer, history of chronic bronchitis                        |
|                               |                                                                                                                                                                                | Used smoky coal before 20 years old       | vs. Never used smoky coal            | 5.10 (0.97-26.81)                               | age, menstrual cycle length, age of menopause, family history of lung cancer, history of chronic bronchitis                        |
| Dai <i>et al.</i> (1996) (S8) | Case-control:<br>120 female adenocarcinoma cases (never smokers)<br>120 female population controls (never smokers)<br>Study location: China (Harbin)<br>Study years: 1992-1993 | 1-19 years coal stove use in bedroom      | vs. Never used coal stove in bedroom | 4.46 (1.61-12.33)                               | age, income, size of residence, coal heating, exposure to coal dust, fried cooking, carrot consumption, family history of cancer   |
|                               |                                                                                                                                                                                | ≥30 (sic) years coal stove use in bedroom | vs. Never used coal stove in bedroom | 18.75 (3.94-29.32)                              | age, income, size of residence, coal heating, exposure to coal dust, fried cooking, carrot consumption, family history of cancer   |
|                               |                                                                                                                                                                                | 1-24 years coal heating                   | vs. Never used coal heating          | 5.81 (1.67-20.22)                               | age, income, size of residence, coal stove in bedroom, exposure to coal dust, fried cooking, carrot consumption, family history of |

|                                 |                                                                                                                                                                             |                                                      |     |                                                |                                                     |                                                                                                                                                     |
|---------------------------------|-----------------------------------------------------------------------------------------------------------------------------------------------------------------------------|------------------------------------------------------|-----|------------------------------------------------|-----------------------------------------------------|-----------------------------------------------------------------------------------------------------------------------------------------------------|
|                                 |                                                                                                                                                                             | 25-34 years coal heating                             | vs. | Never used coal heating                        | 4.70 (1.28-17.18)                                   | cancer<br>age, income, size of residence, coal stove in bedroom, exposure to coal dust, fried cooking, carrot consumption, family history of cancer |
|                                 |                                                                                                                                                                             | ≥10 years exposure to coal dust                      | vs. | <10 years exposure to coal dust                | 2.66 (1.09-6.52)                                    | age, income, size of residence, coal stove in bedroom, coal heating, fried cooking, carrot consumption, family history of cancer                    |
| Wang <i>et al.</i> (1996) (S9)  | Case-control:<br>135 female lung cancer cases (never smokers)<br>135 female hospital controls (never smokers)<br>Study location: China (Shenyang)<br>Study years: 1992-1994 | Exposure to coal smoke during cooking                | vs. | No exposure to coal smoke                      | not statistically significant<br>(value not stated) | age, other variables in multivariate analysis not stated                                                                                            |
| Ko <i>et al.</i> (1997) (S10)   | Case-control:<br>105 female lung cancer cases (never smokers)<br>105 female hospital controls (never smokers)<br>Study location: Taiwan<br>Study years: 1992-1993           | Coal or anthracite cooking fuel before 20 years old  | vs. | No cooking or gas cooking before 20 years old  | 0.5 (0.2-1.6)                                       | age, SES, residential area, education                                                                                                               |
|                                 |                                                                                                                                                                             | Coal or anthracite cooking fuel when 20-40 years old | vs. | No cooking or gas cooking when 20-40 years old | 1.1 (0.4-3.0)                                       | age, SES, residential area, education                                                                                                               |
|                                 |                                                                                                                                                                             | Coal or anthracite cooking fuel when 20-40 years old | vs. | No cooking or gas cooking when 20-40 years old | 1.3 (0.3-5.8)                                       | age, SES, residential area, education, living near industrial district, tuberculosis, fume extractor use, vegetable consumption                     |
|                                 |                                                                                                                                                                             | Coal or anthracite cooking fuel after 40 years old   | vs. | No cooking or gas cooking after 40 years old   | 1.1 (0.1-8.0)                                       | age, SES, residential area, education                                                                                                               |
| Shen <i>et al.</i> (1998) (S11) | Case-control:<br>70 female adenocarcinoma cases (never smokers)                                                                                                             | Coal stove used for heating                          | vs. | Coal stove not used for heating                | 1.78 (0.79-4.02)                                    | Neighborhood, age, occupation                                                                                                                       |

|                                      |                                                                                                                                                                                                                                         |                                                                        |     |                                                          |                                                     |                                                                                                                                                                           |
|--------------------------------------|-----------------------------------------------------------------------------------------------------------------------------------------------------------------------------------------------------------------------------------------|------------------------------------------------------------------------|-----|----------------------------------------------------------|-----------------------------------------------------|---------------------------------------------------------------------------------------------------------------------------------------------------------------------------|
|                                      | 70 female population controls (never smokers)<br>Study location: China (Nanjing)<br>Study year: 1993                                                                                                                                    | Coal stove used for heating                                            | vs. | Coal stove not used for heating                          | not statistically significant<br>(value not stated) | Neighborhood, age, occupation, SHS exposure, chronic lung disease, size of residence, gas fuel in home, cooking fumes, participation in cooking, family history of cancer |
| Zhong <i>et al.</i> (1999) (S12)     | Case-control:<br>504 female lung cancer cases (never smokers)<br>601 female population controls (never smokers)<br>Study location: China (Shanghai)<br>Study years: 1992-1994                                                           | Coal and gas used for cooking (all histological types)                 | vs. | Only coal used for cooking (all histological types)      | 0.92 (0.63-1.35)                                    | age, education, income, vitamin C intake, respondent status, SHS exposure, family history of lung cancer, occupational exposures                                          |
|                                      |                                                                                                                                                                                                                                         | Coal and gas used for cooking (adenocarcinoma cases)                   | vs. | Only coal used for cooking (adenocarcinoma cases)        | 1.16 (0.74-1.81)                                    | age, education, income, vitamin C intake, respondent status, SHS exposure, family history of lung cancer, occupational exposures                                          |
|                                      |                                                                                                                                                                                                                                         | Coal and gas used for cooking (nonadenocarcinoma cases)                | vs. | Only coal used for cooking (nonadenocarcinoma cases)     | 0.71 (0.34-1.49)                                    | age, education, income, vitamin C intake, respondent status, SHS exposure, family history of lung cancer, occupational exposures                                          |
|                                      |                                                                                                                                                                                                                                         | Coal and gas used for cooking (cases of unknown cell types)            | vs. | Only coal used for cooking (cases of unknown cell types) | 0.64 (0.31-1.33)                                    | age, education, income, vitamin C intake, respondent status, SHS exposure, family history of lung cancer, occupational exposures                                          |
| Lissowska <i>et al.</i> (2005) (S13) | Case-control:<br>223 male and female lung cancer cases (never smokers)<br>1039 male and female population controls (never smokers)<br>Study location: Czech Republic, Hungary, Poland, Russia, United Kingdom<br>Study years: 1998-2001 | Solid fuels (coal and biomass) used for cooking >0 to 25% of the time  | vs. | Never use solid fuels (coal and biomass) for cooking     | 1.04 (0.61-1.75)                                    | age, gender, education, study center                                                                                                                                      |
|                                      |                                                                                                                                                                                                                                         | Solid fuels (coal and biomass) used for cooking >25 to 50% of the time | vs. | Never use solid fuels (coal and biomass) for cooking     | 0.93 (0.60-1.45)                                    | age, gender, education, study center                                                                                                                                      |
|                                      |                                                                                                                                                                                                                                         | Solid fuels (coal and biomass) used for cooking >50% of the time       | vs. | Never use solid fuels (coal and biomass) for cooking     | 1.06 (0.64-1.76)                                    | age, gender, education, study center                                                                                                                                      |

|                                     |                                                                                                                                                                                                            |                                                                                                                               |     |                                                                |                                                |                                                                 |
|-------------------------------------|------------------------------------------------------------------------------------------------------------------------------------------------------------------------------------------------------------|-------------------------------------------------------------------------------------------------------------------------------|-----|----------------------------------------------------------------|------------------------------------------------|-----------------------------------------------------------------|
| Pisani et al. (2006) (S14)          | Case-control:<br>15 male and female lung cancer cases (never smokers)<br>40 hospital and 33 population controls (never smokers)<br>Study location: Thailand<br>Study years: 1993-1995                      | Cumulative index of exposure to domestic fumes (years spent using coal or wood adjusted for indoor/outdoor cooking) $\geq 15$ | vs. | Cumulative index of exposure to domestic fumes $< 15$          | 0.4 (0.1-2.0)                                  | age, gender                                                     |
| Sapkota et al. (2008) (S15)         | Case-control:<br>177 male and female lung cancer cases (never smokers)<br>457 male and female hospital (patients and visitors) controls (never smokers)<br>Study location: India<br>Study years: 2001-2004 | Coal used as cooking fuel for more than half of lifetime                                                                      | vs. | Only used modern cooking fuels (gas, electricity, or kerosene) | 0.40 (0.07-2.13)                               | age, gender, center, SES, use of non-cigarette tobacco products |
|                                     |                                                                                                                                                                                                            | Only coal used as cooking fuel throughout life                                                                                | vs. | Only used modern cooking fuels (gas, electricity, or kerosene) | 7.46 (2.15-25.94)                              | age, gender, center, SES, use of non-cigarette tobacco products |
|                                     |                                                                                                                                                                                                            | Coal used as cooking fuel for $>0$ to 30 years                                                                                | vs. | Only used modern cooking fuels (gas, electricity, or kerosene) | 1.22 (0.42-3.49)                               | age, gender, center, SES, use of non-cigarette tobacco products |
|                                     |                                                                                                                                                                                                            | Coal used as cooking fuel for $>30$ to 50 years                                                                               | vs. | Only used modern cooking fuels (gas, electricity, or kerosene) | 1.99 (0.90-4.43)                               | age, gender, center, SES, use of non-cigarette tobacco products |
|                                     |                                                                                                                                                                                                            | Coal used as cooking fuel for $>50$ years                                                                                     | vs. | Only used modern cooking fuels (gas, electricity, or kerosene) | 3.81 (1.16-12.46)<br>$P_{\text{trend}} < 0.01$ | age, gender, center, SES, use of non-cigarette tobacco products |
| Biomass Fuel:<br>Sobue (1990) (S16) | Case-control:<br>144 female lung cancer cases (nonsmokers)<br>731 female hospital controls (nonsmokers)<br>Study location: Japan (Osaka)<br>Study years: 1986-1988                                         | Wood or straw used as cooking fuels at 15 years old                                                                           | vs. | Wood or straw not used as cooking fuels at 15 years old        | 1.24 (0.86-1.81)                               | age, education                                                  |
|                                     |                                                                                                                                                                                                            | Wood or straw used as cooking fuels at 30 years old                                                                           | vs. | Wood or straw not used as cooking fuels at 30 years old        | 1.89 (1.16-3.06)                               | age, education                                                  |
|                                     |                                                                                                                                                                                                            | Wood or straw used as cooking fuels at 30 years old                                                                           | vs. | Wood or straw not used as cooking fuels at 30 years old        | 1.77 (1.08-2.91)                               | age, education, SHS exposure                                    |

|                                         |                                                                                                                                                                                                            |                                                                                  |     |                                                                |                  |                                                                                                                                 |
|-----------------------------------------|------------------------------------------------------------------------------------------------------------------------------------------------------------------------------------------------------------|----------------------------------------------------------------------------------|-----|----------------------------------------------------------------|------------------|---------------------------------------------------------------------------------------------------------------------------------|
| Ko et al.<br>(1997)(S10)                | Case-control:<br>105 female lung cancer cases (never smokers)<br>105 female hospital controls (never smokers)<br>Study location: Taiwan<br>Study years: 1992-1993                                          | Wood or charcoal cooking fuel before 20 years old                                | vs. | No cooking or gas cooking before 20 years old                  | 2.5 (1.3-5.1)    | age, SES, residential area, education                                                                                           |
|                                         |                                                                                                                                                                                                            | Wood or charcoal cooking fuel when 20-40 years old                               | vs. | No cooking or gas cooking when 20-40 years old                 | 2.5 (1.1-5.7)    | age, SES, residential area, education                                                                                           |
|                                         |                                                                                                                                                                                                            | Wood or charcoal cooking fuel when 20-40 years old                               | vs. | No cooking or gas cooking when 20-40 years old                 | 2.7 (0.9-8.9)    | age, SES, residential area, education, living near industrial district, tuberculosis, fume extractor use, vegetable consumption |
|                                         |                                                                                                                                                                                                            | Wood or charcoal cooking fuel after 40 years old                                 | vs. | No cooking or gas cooking after 40 years old                   | 1.0 (0.2-3.9)    | age, SES, residential area, education                                                                                           |
| Hernández-Garduño et al.<br>(2004)(S61) | 113 female adenocarcinoma cases (never smokers)<br>273 female hospital controls (never smokers)<br>Study location: Mexico (Mexico City)<br>Study years: 1986-1994                                          | 1-20 years cooking with wood                                                     | vs. | Never cooked with wood                                         | 0.6 (0.3-1.2)    | age, SHS exposure, education, SES                                                                                               |
|                                         |                                                                                                                                                                                                            | 21-50 years cooking with wood                                                    | vs. | Never cooked with wood                                         | 0.6 (0.3-1.3)    | age, SHS exposure, education, SES                                                                                               |
|                                         |                                                                                                                                                                                                            | >50 years cooking with wood                                                      | vs. | Never cooked with wood                                         | 1.9 (1.1-3.5)    | age, SHS exposure, education, SES                                                                                               |
| Behera and Balamugesh<br>(2005) (S62)   | Case-control:<br>25 female lung cancer cases (nonsmokers)<br>43 female hospital controls (nonsmokers)<br>Study location: India (Chandigarh)<br>Study years: 1999-2002                                      | Use of biomass fuels (wood, cow-dung cake, agricultural waste, coal) for cooking | vs. | Use of liquified petroleum gas for cooking                     | 5.33 (1.7-16.7)  | none stated                                                                                                                     |
| Sapkota et al.<br>(2008) (S15)          | Case-control:<br>177 male and female lung cancer cases (never smokers)<br>457 male and female hospital (patients and visitors) controls (never smokers)<br>Study location: India<br>Study years: 2001-2004 | Ever used solid cooking fuels (wood, crop residue, animal dung, coal)            | vs. | Only used modern cooking fuels (gas, electricity, or kerosene) | 0.84 (0.55-1.29) | age, gender, center, SES, use of non-cigarette tobacco products                                                                 |
|                                         |                                                                                                                                                                                                            | Solid fuels used for cooking for less than half of lifetime                      | vs. | Only used modern cooking fuels (gas, electricity, or kerosene) | 0.47 (0.20-1.13) | age, gender, center, SES, use of non-cigarette tobacco products                                                                 |

|                                                             |     |                                                                |                                               |                                                                 |
|-------------------------------------------------------------|-----|----------------------------------------------------------------|-----------------------------------------------|-----------------------------------------------------------------|
| Solid fuels used for cooking for more than half of lifetime | vs. | Only used modern cooking fuels (gas, electricity, or kerosene) | 0.94 (0.44-2.02)                              | age, gender, center, SES, use of non-cigarette tobacco products |
| Only solid fuels used for cooking throughout life           | vs. | Only used modern cooking fuels (gas, electricity, or kerosene) | 0.95 (0.59-1.54)                              | age, gender, center, SES, use of non-cigarette tobacco products |
| Wood used as cooking fuel for more than half of lifetime    | vs. | Only used modern cooking fuels (gas, electricity, or kerosene) | 1.23 (0.55-2.74)                              | age, gender, center, SES, use of non-cigarette tobacco products |
| Only wood used as cooking fuel throughout life              | vs. | Only used modern cooking fuels (gas, electricity, or kerosene) | 0.75 (0.45-1.24)                              | age, gender, center, SES, use of non-cigarette tobacco products |
| Wood used as cooking fuel for >0 to 30 years                | vs. | Only used modern cooking fuels (gas, electricity, or kerosene) | 0.49 (0.29-0.83)                              | age, gender, center, SES, use of non-cigarette tobacco products |
| Wood used as cooking fuel for >30 to 50 years               | vs. | Only used modern cooking fuels (gas, electricity, or kerosene) | 1.27 (0.87-1.85)                              | age, gender, center, SES, use of non-cigarette tobacco products |
| Wood used as cooking fuel for >50 years                     | vs. | Only used modern cooking fuels (gas, electricity, or kerosene) | 0.95 (0.65-1.37)<br>$P_{\text{trend}} = 0.86$ | age, gender, center, SES, use of non-cigarette tobacco products |
| Mixed wood/coal/other solid fuels used for cooking          | vs. | Only used modern cooking fuels (gas, electricity, or kerosene) | 0.52 (0.22-1.22)                              | age, gender, center, SES, use of non-cigarette tobacco products |

---

**Abbreviations:**

CI: confidence interval

SES: socioeconomic status

SHS: secondhand smoke



Supplemental Table 3: Results of studies on exposure to smoke from cooking oil, high-temperature cooking and other cooking practices and risk of lung cancer among never smokers

| Study                          | Design/population                                                                                                                                                              | Exposure Group                                            | Reference Group                                            | Risk Estimate (95% CI) | Adjustment Variables                                                                                                                     |
|--------------------------------|--------------------------------------------------------------------------------------------------------------------------------------------------------------------------------|-----------------------------------------------------------|------------------------------------------------------------|------------------------|------------------------------------------------------------------------------------------------------------------------------------------|
| Lan <i>et al.</i> (1993) (S7)  | Case-control:<br>139 female lung cancer cases (nonsmokers)<br>139 female population controls (nonsmokers)<br>Study location: China (Xuanwei)<br>Study years: 1988-1990         | Occasional use of rapeseed oil                            | vs. Never use rapeseed oil                                 | 1.26 (0.68-2.63)       | age, menstrual cycle length, age of menopause, family history of lung cancer, history of chronic bronchitis                              |
|                                |                                                                                                                                                                                | Often use of rapeseed oil                                 | vs. Never use rapeseed oil                                 | 4.58 (0.56-37.08)      | age, menstrual cycle length, age of menopause, family history of lung cancer, history of chronic bronchitis                              |
| Dai <i>et al.</i> (1996) (S8)  | Case-control:<br>120 female adenocarcinoma cases (never smokers)<br>120 female population controls (never smokers)<br>Study location: China (Harbin)<br>Study years: 1992-1993 | Fried and deep fried cooking >5 times per month           | vs. Fried or deep fried cooking ≤ 5 times per month        | 9.20 (1.54-55.28)      | age, income, size of residence, coal heating, exposure to coal dust, coal stove in bedroom, carrot consumption, family history of cancer |
| Wang <i>et al.</i> (1996) (S9) | Case-control:<br>135 female lung cancer cases (never smokers)<br>135 female hospital controls (never smokers)<br>Study location: China (Shenyang)<br>Study years: 1992-1994    | Exposure to cooking fumes                                 | vs. No exposure to cooking fumes                           | 4.02 (2.38-6.78)       | age, other variables in multivariate analysis not stated                                                                                 |
| Ko <i>et al.</i> (1997) (S10)  | Case-control:<br>105 female lung cancer cases (never smokers)<br>105 female hospital controls (never smokers)<br>Study location: Taiwan<br>Study years: 1992-1993              | No fume extractor in kitchen before 20 years old          | vs. Fume extractor in kitchen before 20 years old          | 5.3 (1.1-25.6)         | age, SES, residential area, education                                                                                                    |
|                                |                                                                                                                                                                                | No fume extractor in kitchen when 20-40 years old         | vs. Fume extractor in kitchen when 20-40 years old         | 6.4 (2.9-14.1)         | age, SES, residential area, education                                                                                                    |
|                                |                                                                                                                                                                                | No cooking or gas cooking when 20-40 years old            | vs. Fume extractor in kitchen when 20-40 years old         | 8.3 (3.1-22.7)         | age, SES, residential area, education, living near industrial district, tuberculosis, fume extractor use, vegetable consumption          |
|                                |                                                                                                                                                                                | No fume extractor in kitchen after 40 years old           | vs. Fume extractor in kitchen after 40 years old           | 2.3 (1.1-5.1)          | age, SES, residential area, education                                                                                                    |
|                                |                                                                                                                                                                                | Stir frying 0-4 times/week (no fume extractor in kitchen) | vs. Stir-frying 0-4 times/week (fume extractor in kitchen) | 8.6 (1.2-61.3)         | age, SES, residential area, education                                                                                                    |

|                                  |                                                                                                                                                                               |                                                                             |     |                                                        |                  |                                                                                                                                  |
|----------------------------------|-------------------------------------------------------------------------------------------------------------------------------------------------------------------------------|-----------------------------------------------------------------------------|-----|--------------------------------------------------------|------------------|----------------------------------------------------------------------------------------------------------------------------------|
|                                  |                                                                                                                                                                               | Stir-frying $\geq 5$ times/week (fume extractor in kitchen)                 | vs. | Stir-frying 0-4 times/week (fume extractor in kitchen) | 2.2 (0.7-7.6)    | age, SES, residential area, education                                                                                            |
|                                  |                                                                                                                                                                               | Stir-frying $\geq 5$ times/week (no fume extractor in kitchen)              | vs. | Stir-frying 0-4 times/week (fume extractor in kitchen) | 13.3 (3.4-53.4)  | age, SES, residential area, education                                                                                            |
|                                  |                                                                                                                                                                               | Frying 0-4 times/week (no fume extractor in kitchen)                        | vs. | Frying 0-4 times/week (fume extractor in kitchen)      | 9.8 (1.9-49.3)   | age, SES, residential area, education                                                                                            |
|                                  |                                                                                                                                                                               | Frying $\geq 5$ times/week (fume extractor in kitchen)                      | vs. | Frying 0-4 times/week (fume extractor in kitchen)      | 1.8 (0.5-6.5)    | age, SES, residential area, education                                                                                            |
|                                  |                                                                                                                                                                               | Frying $\geq 5$ times/week (no fume extractor in kitchen)                   | vs. | Frying 0-4 times/week (fume extractor in kitchen)      | 9.2 (2.8-29.9)   | age, SES, residential area, education                                                                                            |
|                                  |                                                                                                                                                                               | Deep frying 0-4 times/week (no fume extractor in kitchen)                   | vs. | Deep frying 0-4 times/week (fume extractor in kitchen) | 5.9 (2.6-13.4)   | age, SES, residential area, education                                                                                            |
|                                  |                                                                                                                                                                               | Deep frying $\geq 5$ times/week (fume extractor in kitchen)                 | vs. | Deep frying 0-4 times/week (fume extractor in kitchen) | 0.5 (0.1-2.3)    | age, SES, residential area, education                                                                                            |
|                                  |                                                                                                                                                                               | Deep frying $\geq 5$ times/week (no fume extractor in kitchen)              | vs. | Deep frying 0-4 times/week (fume extractor in kitchen) | 5.9 (1.9-18.2)   | age, SES, residential area, education                                                                                            |
| Shen <i>et al.</i> (1998) (S11)  | Case-control:<br>70 female adenocarcinoma cases (never smokers)<br>70 female population controls (never smokers)<br>Study location: China (Nanjing)<br>Study year: 1993       | Kitchen cooking fume pollution                                              | vs. | No kitchen cooking fume pollution                      | 2.45 (1.06-5.66) | age, occupation, neighborhood, chronic lung disease, family history of cancer                                                    |
| Zhong <i>et al.</i> (1999) (S12) | Case-control:<br>504 female lung cancer cases (never smokers)<br>601 female population controls (never smokers)<br>Study location: China (Shanghai)<br>Study years: 1992-1994 | <u>All histologic types:</u><br>High temperature cooking with visible fumes | vs. | No high temperature cooking with visible fumes         | 1.64 (1.24-2.17) | age, education, income, vitamin C intake, respondent status, SHS exposure, family history of lung cancer, occupational exposures |
|                                  |                                                                                                                                                                               | Somewhat smoky in kitchen during cooking                                    | vs. | No smoke or slightly smoky                             | 1.67 (1.25-2.21) | age, education, income, vitamin C intake, respondent status, SHS exposure, family history of lung cancer, occupational exposures |

|                                              |     |                                         |                  |                                                                                                                                  |
|----------------------------------------------|-----|-----------------------------------------|------------------|----------------------------------------------------------------------------------------------------------------------------------|
| Considerably smoky in kitchen during kitchen | vs. | No smoke or slightly smoky              | 2.38 (1.58-3.57) | age, education, income, vitamin C intake, respondent status, SHS exposure, family history of lung cancer, occupational exposures |
| Rarely have eye irritation while cooking     | vs. | Never have eye irritation while cooking | 1.49 (0.91-2.43) | age, education, income, vitamin C intake, respondent status, SHS exposure, family history of lung cancer, occupational exposures |
| Sometimes have eye irritation while cooking  | vs. | Never have eye irritation while cooking | 1.75 (1.16-2.62) | age, education, income, vitamin C intake, respondent status, SHS exposure, family history of lung cancer, occupational exposures |
| Frequently have eye irritation while cooking | vs. | Never have eye irritation while cooking | 1.68 (1.02-2.78) | age, education, income, vitamin C intake, respondent status, SHS exposure, family history of lung cancer, occupational exposures |
| Most often use rapeseed oil for cooking      | vs. | Most often use soybean oil for cooking  | 1.84 (1.12-3.02) | age, education, income, vitamin C intake, respondent status, SHS exposure, family history of lung cancer, occupational exposures |
| Use soybean and rapeseed oil for cooking     | vs. | Most often use soybean oil for cooking  | 0.92 (0.37-2.28) | age, education, income, vitamin C intake, respondent status, SHS exposure, family history of lung cancer, occupational exposures |
| Stir-frying 7 times/week                     | vs. | Stir-frying <7 times/week               | 0.38 (0.19-0.75) | age, education, income, vitamin C intake, respondent status, SHS exposure, family history of lung cancer, occupational exposures |
| Stir-frying >7 times/week                    | vs. | Stir-frying <7 times/week               | 2.33 (0.68-7.95) | age, education, income, vitamin C intake, respondent status, SHS exposure, family history of lung cancer, occupational exposures |
| Frying >1 time/week                          | vs. | Frying ≤ 1 time/week                    | 2.09 (1.14-3.84) | age, education, income, vitamin C intake, respondent status, SHS exposure, family history of lung cancer, occupational exposures |

|                                              |     |                                                |                  |                                                                                                                                  |
|----------------------------------------------|-----|------------------------------------------------|------------------|----------------------------------------------------------------------------------------------------------------------------------|
| Deep-frying >1 time/week                     | vs. | Deep-frying ≤ 1 time/week                      | 1.88 (1.06-3.32) | age, education, income, vitamin C intake, respondent status, SHS exposure, family history of lung cancer, occupational exposures |
| <i>Adenocarcinoma cases:</i>                 |     |                                                |                  |                                                                                                                                  |
| High temperature cooking with visible fumes  | vs. | No high temperature cooking with visible fumes | 1.67 (1.19-2.34) | age, education, income, vitamin C intake, respondent status, SHS exposure, family history of lung cancer, occupational exposures |
| Somewhat smoky in kitchen during cooking     | vs. | No smoke or slightly smoky                     | 1.76 (1.25-2.46) | age, education, income, vitamin C intake, respondent status, SHS exposure, family history of lung cancer, occupational exposures |
| Considerably smoky in kitchen during kitchen | vs. | No smoke or slightly smoky                     | 2.12 (1.29-3.48) | age, education, income, vitamin C intake, respondent status, SHS exposure, family history of lung cancer, occupational exposures |
| Rarely have eye irritation while cooking     | vs. | Never have eye irritation while cooking        | 1.08 (0.59-1.99) | age, education, income, vitamin C intake, respondent status, SHS exposure, family history of lung cancer, occupational exposures |
| Sometimes have eye irritation while cooking  | vs. | Never have eye irritation while cooking        | 1.46 (0.90-2.37) | age, education, income, vitamin C intake, respondent status, SHS exposure, family history of lung cancer, occupational exposures |
| Frequently have eye irritation while cooking | vs. | Never have eye irritation while cooking        | 1.22 (0.71-2.48) | age, education, income, vitamin C intake, respondent status, SHS exposure, family history of lung cancer, occupational exposures |
| Most often use rapeseed oil for cooking      | vs. | Most often use soybean oil for cooking         | 1.88 (1.07-3.32) | age, education, income, vitamin C intake, respondent status, SHS exposure, family history of lung cancer, occupational exposures |
| Use soybean and rapeseed oil for cooking     | vs. | Most often use soybean oil for cooking         | 0.41 (0.12-1.43) | age, education, income, vitamin C intake, respondent status, SHS exposure, family history of lung cancer, occupational exposures |

|                                              |     |                                                |                   |                                                                                                                                  |
|----------------------------------------------|-----|------------------------------------------------|-------------------|----------------------------------------------------------------------------------------------------------------------------------|
| Stir-frying 7 times/week                     | vs. | Stir-frying <7 times/week                      | 0.50 (0.23-1.11)  | age, education, income, vitamin C intake, respondent status, SHS exposure, family history of lung cancer, occupational exposures |
| Stir-frying >7 times/week                    | vs. | Stir-frying <7 times/week                      | 2.81 (0.68-11.41) | age, education, income, vitamin C intake, respondent status, SHS exposure, family history of lung cancer, occupational exposures |
| Frying >1 time/week                          | vs. | Frying ≤ 1 time/week                           | 1.79 (0.88-3.66)  | age, education, income, vitamin C intake, respondent status, SHS exposure, family history of lung cancer, occupational exposures |
| Deep-frying >1 time/week                     | vs. | Deep-frying ≤ 1 time/week                      | 1.15 (0.55-2.42)  | age, education, income, vitamin C intake, respondent status, SHS exposure, family history of lung cancer, occupational exposures |
| <i><u>Nonadenocarcinoma cases:</u></i>       |     |                                                |                   |                                                                                                                                  |
| High temperature cooking with visible fumes  | vs. | No high temperature cooking with visible fumes | 2.22 (1.34-3.67)  | age, education, income, vitamin C intake, respondent status, SHS exposure, family history of lung cancer, occupational exposures |
| Somewhat smoky in kitchen during cooking     | vs. | No smoke or slightly smoky                     | 1.60 (0.94-2.74)  | age, education, income, vitamin C intake, respondent status, SHS exposure, family history of lung cancer, occupational exposures |
| Considerably smoky in kitchen during kitchen | vs. | No smoke or slightly smoky                     | 2.68 (1.34-5.33)  | age, education, income, vitamin C intake, respondent status, SHS exposure, family history of lung cancer, occupational exposures |
| Rarely have eye irritation while cooking     | vs. | Never have eye irritation while cooking        | 2.32 (1.06-5.05)  | age, education, income, vitamin C intake, respondent status, SHS exposure, family history of lung cancer, occupational exposures |
| Sometimes have eye irritation while cooking  | vs. | Never have eye irritation while cooking        | 1.69 (0.82-3.53)  | age, education, income, vitamin C intake, respondent status, SHS exposure, family history of lung cancer, occupational exposures |

|                                              |     |                                                |                   |                                                                                                                                  |
|----------------------------------------------|-----|------------------------------------------------|-------------------|----------------------------------------------------------------------------------------------------------------------------------|
| Frequently have eye irritation while cooking | vs. | Never have eye irritation while cooking        | 2.28 (0.99-5.25)  | age, education, income, vitamin C intake, respondent status, SHS exposure, family history of lung cancer, occupational exposures |
| Most often use rapeseed oil for cooking      | vs. | Most often use soybean oil for cooking         | 1.49 (0.60-3.68)  | age, education, income, vitamin C intake, respondent status, SHS exposure, family history of lung cancer, occupational exposures |
| Use soybean and rapeseed oil for cooking     | vs. | Most often use soybean oil for cooking         | 1.43 (0.35-5.82)  | age, education, income, vitamin C intake, respondent status, SHS exposure, family history of lung cancer, occupational exposures |
| Stir-frying 7 times/week                     | vs. | Stir-frying <7 times/week                      | 0.27 (0.10-0.77)  | age, education, income, vitamin C intake, respondent status, SHS exposure, family history of lung cancer, occupational exposures |
| Stir-frying >7 times/week                    | vs. | Stir-frying <7 times/week                      | 2.72 (0.47-15.27) | age, education, income, vitamin C intake, respondent status, SHS exposure, family history of lung cancer, occupational exposures |
| Frying >1 time/week                          | vs. | Frying ≤ 1 time/week                           | 2.95 (1.11-7.81)  | age, education, income, vitamin C intake, respondent status, SHS exposure, family history of lung cancer, occupational exposures |
| Deep-frying >1 time/week                     | vs. | Deep-frying ≤ 1 time/week                      | 3.37 (1.42-8.01)  | age, education, income, vitamin C intake, respondent status, SHS exposure, family history of lung cancer, occupational exposures |
| <i>Cases of unknown cell types:</i>          |     |                                                |                   |                                                                                                                                  |
| High temperature cooking with visible fumes  | vs. | No high temperature cooking with visible fumes | 1.54 (0.96-2.49)  | age, education, income, vitamin C intake, respondent status, SHS exposure, family history of lung cancer, occupational exposures |
| Somewhat smoky in kitchen during cooking     | vs. | No smoke or slightly smoky                     | 1.57 (0.96-2.56)  | age, education, income, vitamin C intake, respondent status, SHS exposure, family history of lung cancer, occupational exposures |

|                                              |     |                                         |                   |                                                                                                                                  |
|----------------------------------------------|-----|-----------------------------------------|-------------------|----------------------------------------------------------------------------------------------------------------------------------|
| Considerably smoky in kitchen during kitchen | vs. | No smoke or slightly smoky              | 3.20 (1.69-6.04)  | age, education, income, vitamin C intake, respondent status, SHS exposure, family history of lung cancer, occupational exposures |
| Rarely have eye irritation while cooking     | vs. | Never have eye irritation while cooking | 2.31 (1.09-4.87)  | age, education, income, vitamin C intake, respondent status, SHS exposure, family history of lung cancer, occupational exposures |
| Sometimes have eye irritation while cooking  | vs. | Never have eye irritation while cooking | 2.48 (1.30-4.74)  | age, education, income, vitamin C intake, respondent status, SHS exposure, family history of lung cancer, occupational exposures |
| Frequently have eye irritation while cooking | vs. | Never have eye irritation while cooking | 2.39 (1.09-5.23)  | age, education, income, vitamin C intake, respondent status, SHS exposure, family history of lung cancer, occupational exposures |
| Most often use rapeseed oil for cooking      | vs. | Most often use soybean oil for cooking  | 1.71 (0.73-3.99)  | age, education, income, vitamin C intake, respondent status, SHS exposure, family history of lung cancer, occupational exposures |
| Use soybean and rapeseed oil for cooking     | vs. | Most often use soybean oil for cooking  | 1.08 (0.24-4.95)  | age, education, income, vitamin C intake, respondent status, SHS exposure, family history of lung cancer, occupational exposures |
| Stir-frying 7 times/week                     | vs. | Stir-frying <7 times/week               | 0.22 (0.08-0.58)  | age, education, income, vitamin C intake, respondent status, SHS exposure, family history of lung cancer, occupational exposures |
| Stir-frying >7 times/week                    | vs. | Stir-frying <7 times/week               | 2.35 (0.46-11.77) | age, education, income, vitamin C intake, respondent status, SHS exposure, family history of lung cancer, occupational exposures |
| Frying >1 time/week                          | vs. | Frying ≤ 1 time/week                    | 2.72 (1.05-7.04)  | age, education, income, vitamin C intake, respondent status, SHS exposure, family history of lung cancer, occupational exposures |

|                               |                                                                                                                                                                                   |                                                   |     |                                                      |                  |                                                                                                                                  |
|-------------------------------|-----------------------------------------------------------------------------------------------------------------------------------------------------------------------------------|---------------------------------------------------|-----|------------------------------------------------------|------------------|----------------------------------------------------------------------------------------------------------------------------------|
|                               |                                                                                                                                                                                   | Deep-frying >1 time/week                          | vs. | Deep-frying ≤ 1 time/week                            | 3.56 (1.63-7.76) | age, education, income, vitamin C intake, respondent status, SHS exposure, family history of lung cancer, occupational exposures |
| Ko <i>et al.</i> (2000) (S19) | Case-control: 131 female lung cancer cases (never smokers) 252 female hospital controls and 262 population controls (never smokers) Study location: Taiwan Study years: 1993-1996 | <u>Hospital controls:</u>                         |     |                                                      |                  |                                                                                                                                  |
|                               |                                                                                                                                                                                   | Cooks daily                                       | vs. | Does not cook daily                                  | 1.9 (0.2-18.1)   | age, geographic area, occupation, history of lung disease, SHS exposure, SES                                                     |
|                               |                                                                                                                                                                                   | >20 years old when started cooking                | vs. | ≤20 years old when started cooking                   | 1.0 (0.6-1.7)    | age, geographic area, occupation, history of lung disease, SHS exposure, SES                                                     |
|                               |                                                                                                                                                                                   | 21-40 years spent cooking at home                 | vs. | 1-20 years spent cooking at home                     | 1.0 (0.5-1.8)    | age, geographic area, occupation, history of lung disease, SHS exposure, SES                                                     |
|                               |                                                                                                                                                                                   | >40 years spent cooking at home                   | vs. | 1-20 years spent cooking at home                     | 1.2 (0.4-3.4)    | age, geographic area, occupation, history of lung disease, SHS exposure, SES                                                     |
|                               |                                                                                                                                                                                   | Cooks 2 meals per day                             | vs. | Cooks 1 meal per day                                 | 1.9 (0.9-4.0)    | age, geographic area, occupation, history of lung disease, SHS exposure, SES                                                     |
|                               |                                                                                                                                                                                   | Cooks 3 meals per day                             | vs. | Cooks 1 meal per day                                 | 2.8 (1.2-6.3)    | age, geographic area, occupation, history of lung disease, SHS exposure, SES                                                     |
|                               |                                                                                                                                                                                   | ≥2 windows in kitchen                             | vs. | <2 windows in kitchen                                | 0.9 (0.5-1.3)    | age, geographic area, occupation, history of lung disease, SHS exposure, SES                                                     |
|                               |                                                                                                                                                                                   | Large openings to the outside in kitchen          | vs. | Small or moderate openings to the outside in kitchen | 1.1 (0.6-2.0)    | age, geographic area, occupation, history of lung disease, SHS exposure, SES                                                     |
|                               |                                                                                                                                                                                   | Good ventilation in kitchen                       | vs. | Poor ventilation in kitchen                          | 0.9 (0.6-1.4)    | age, geographic area, occupation, history of lung disease, SHS exposure, SES                                                     |
|                               |                                                                                                                                                                                   | No fume extractor in kitchen before 20 years old  | vs. | Fume extractor in kitchen before 20 years old        | 2.3 (1.1-5.0)    | age, geographic area, occupation, history of lung disease, SHS exposure, SES                                                     |
|                               |                                                                                                                                                                                   | No fume extractor in kitchen when 20-40 years old | vs. | Fume extractor in kitchen when 20-40 years old       | 5.4 (2.7-10.8)   | age, geographic area, occupation, history of lung disease, SHS exposure, SES                                                     |



|                                                 |     |                                              |                 |                                                                              |
|-------------------------------------------------|-----|----------------------------------------------|-----------------|------------------------------------------------------------------------------|
| No fume extractor in kitchen after 40 years old | vs. | Fume extractor in kitchen after 40 years old | 1.8 (0.7-4.7)   | age, geographic area, occupation, history of lung disease, SHS exposure, SES |
| Frequently have eye irritation while cooking    | vs. | Rarely have eye irritation while cooking     | 2.2 (1.3-3.8)   | age, geographic area, occupation, history of lung disease, SHS exposure, SES |
| Frequently smokiness when cooking               | vs. | Rarely smokiness when cooking                | 1.7 (1.0-2.9)   | age, geographic area, occupation, history of lung disease, SHS exposure, SES |
| Stir frying (fume extractor in kitchen)         | vs. | No stir frying (fume extractor in kitchen)   | 2.2 (1.1-4.1)   | age, geographic area, occupation, history of lung disease, SHS exposure, SES |
| Stir frying (no fume extractor in kitchen)      | vs. | No stir frying (fume extractor in kitchen)   | 12.2 (4.5-33.1) | age, geographic area, occupation, history of lung disease, SHS exposure, SES |
| No stir frying (no fume extractor in kitchen)   | vs. | No stir frying (fume extractor in kitchen)   | 5.9 (1.5-23.3)  | age, geographic area, occupation, history of lung disease, SHS exposure, SES |
| Frying (fume extractor in kitchen)              | vs. | No frying (fume extractor in kitchen)        | 1.8 (0.9-3.7)   | age, geographic area, occupation, history of lung disease, SHS exposure, SES |
| Frying (no fume extractor in kitchen)           | vs. | No frying (fume extractor in kitchen)        | 10.5 (3.9-28.4) | age, geographic area, occupation, history of lung disease, SHS exposure, SES |
| No frying (no fume extractor in kitchen)        | vs. | No frying (fume extractor in kitchen)        | 3.5 (0.8-16.2)  | age, geographic area, occupation, history of lung disease, SHS exposure, SES |
| Deep frying (fume extractor in kitchen)         | vs. | No deep frying (fume extractor in kitchen)   | 2.1 (1.2-3.9)   | age, geographic area, occupation, history of lung disease, SHS exposure, SES |
| Deep frying (no fume extractor in kitchen)      | vs. | No deep frying (fume extractor in kitchen)   | 9.5 (3.9-23.3)  | age, geographic area, occupation, history of lung disease, SHS exposure, SES |
| No deep frying (no fume extractor in kitchen)   | vs. | No frying (fume extractor in kitchen)        | 7.6 (2.1-26.9)  | age, geographic area, occupation, history of lung disease, SHS exposure, SES |
| <i><u>Population controls:</u></i>              |     |                                              |                 |                                                                              |
| Cooks daily                                     | vs. | Does not cook daily                          | 5.9 (0.7-53.6)  | age, occupation, history of lung disease, SHS exposure, SES                  |

|                                                   |     |                                                      |                |                                                             |
|---------------------------------------------------|-----|------------------------------------------------------|----------------|-------------------------------------------------------------|
| >20 years old when started cooking                | vs. | ≤20 years old when started cooking                   | 1.5 (0.9-2.4)  | age, occupation, history of lung disease, SHS exposure, SES |
| 21-40 years spent cooking at home                 | vs. | 1-20 years spent cooking at home                     | 1.3 (0.6-2.6)  | age, occupation, history of lung disease, SHS exposure, SES |
| >40 years spent cooking at home                   | vs. | 1-20 years spent cooking at home                     | 1.0 (0.4-2.9)  | age, occupation, history of lung disease, SHS exposure, SES |
| Cooks 2 meals per day                             | vs. | Cooks 1 meal per day                                 | 3.1 (1.6-6.2)  | age, occupation, history of lung disease, SHS exposure, SES |
| Cooks 3 meals per day                             | vs. | Cooks 1 meal per day                                 | 3.4 (1.6-7.0)  | age, occupation, history of lung disease, SHS exposure, SES |
| ≥2 windows in kitchen                             | vs. | <2 windows in kitchen                                | 1.3 (0.8-2.1)  | age, occupation, history of lung disease, SHS exposure, SES |
| Large openings to the outside in kitchen          | vs. | Small or moderate openings to the outside in kitchen | 0.9 (0.5-1.5)  | age, occupation, history of lung disease, SHS exposure, SES |
| Good ventilation in kitchen                       | vs. | Poor ventilation in kitchen                          | 0.9 (0.6-1.4)  | age, occupation, history of lung disease, SHS exposure, SES |
| No fume extractor in kitchen before 20 years old  | vs. | Fume extractor in kitchen before 20 years old        | 0.9 (0.4-2.0)  | age, occupation, history of lung disease, SHS exposure, SES |
| No fume extractor in kitchen when 20-40 years old | vs. | Fume extractor in kitchen when 20-40 years old       | 2.2 (1.3-3.8)  | age, occupation, history of lung disease, SHS exposure, SES |
| No fume extractor in kitchen after 40 years old   | vs. | Fume extractor in kitchen after 40 years old         | 1.3 (0.6-2.8)  | age, occupation, history of lung disease, SHS exposure, SES |
| Frequently have eye irritation while cooking      | vs. | Rarely have eye irritation while cooking             | 2.1 (1.3-3.5)  | age, occupation, history of lung disease, SHS exposure, SES |
| Frequently smokiness when cooking                 | vs. | Rarely smokiness when cooking                        | 2.5 (1.4-4.3)  | age, occupation, history of lung disease, SHS exposure, SES |
| Stir frying (fume extractor in kitchen)           | vs. | No stir frying (fume extractor in kitchen)           | 2.5 (1.3-4.9)  | age, occupation, history of lung disease, SHS exposure, SES |
| Stir frying (no fume extractor in kitchen)        | vs. | No stir frying (fume extractor in kitchen)           | 5.0 (2.2-11.0) | age, occupation, history of lung disease, SHS exposure, SES |
| No stir frying (no fume extractor in kitchen)     | vs. | No stir frying (fume extractor in kitchen)           | 2.8 (0.8-10.0) | age, occupation, history of lung disease, SHS exposure, SES |
| Frying (fume extractor in kitchen)                | vs. | No frying (fume extractor in kitchen)                | 2.7 (1.3-5.5)  | age, occupation, history of lung disease, SHS exposure, SES |
| Frying (no fume extractor in kitchen)             | vs. | No frying (fume extractor in kitchen)                | 5.3 (2.2-12.3) | age, occupation, history of lung disease, SHS exposure, SES |

|                                 |                                                                                                                                                                      |                                                                                                |     |                                            |                  |                                                                                                                                                                                                                           |
|---------------------------------|----------------------------------------------------------------------------------------------------------------------------------------------------------------------|------------------------------------------------------------------------------------------------|-----|--------------------------------------------|------------------|---------------------------------------------------------------------------------------------------------------------------------------------------------------------------------------------------------------------------|
|                                 |                                                                                                                                                                      | No frying (no fume extractor in kitchen)                                                       | vs. | No frying (fume extractor in kitchen)      | 3.1 (0.8-13.2)   | age, occupation, history of lung disease, SHS exposure, SES                                                                                                                                                               |
|                                 |                                                                                                                                                                      | Deep frying (fume extractor in kitchen)                                                        | vs. | No deep frying (fume extractor in kitchen) | 1.6 (0.9-3.1)    | age, occupation, history of lung disease, SHS exposure, SES                                                                                                                                                               |
|                                 |                                                                                                                                                                      | Deep frying (no fume extractor in kitchen)                                                     | vs. | No deep frying (fume extractor in kitchen) | 3.2 (1.4-7.3)    | age, occupation, history of lung disease, SHS exposure, SES                                                                                                                                                               |
|                                 |                                                                                                                                                                      | No deep frying (no fume extractor in kitchen)                                                  | vs. | No frying (fume extractor in kitchen)      | 2.7 (0.9-8.5)    | age, occupation, history of lung disease, SHS exposure, SES                                                                                                                                                               |
| Seow <i>et al.</i> (2000) (S20) | Case-control:<br>176 female lung cancer cases (never smokers)<br>663 female hospital controls (never smokers)<br>Study location: Singapore<br>Study years: 1996-1998 | Stir frying daily                                                                              | vs. | Stir frying less than daily                | 1.0 (0.7-1.5)    | age, education, birth place, fruit and vegetable consumption                                                                                                                                                              |
|                                 |                                                                                                                                                                      | Stir frying daily, less than daily with meat                                                   | vs. | Stir frying less than daily                | 0.9 (0.6-1.5)    | age, education, birth place, fruit and vegetable consumption                                                                                                                                                              |
|                                 |                                                                                                                                                                      | Stir frying daily with meat                                                                    | vs. | Stir frying less than daily                | 0.9 (0.6-1.4)    | age, education, birth place, fruit and vegetable consumption                                                                                                                                                              |
|                                 |                                                                                                                                                                      | Stir frying daily with meat                                                                    | vs. | Stir frying meat less than daily           | 1.0 (0.7-1.4)    | age, education, birth place, fruit and vegetable consumption                                                                                                                                                              |
|                                 |                                                                                                                                                                      | Stir frying daily with meat, fume filled kitchen less than daily                               | vs. | Stir frying meat less than daily           | 1.1 (0.7-1.7)    | age, education, birth place, fruit and vegetable consumption                                                                                                                                                              |
|                                 |                                                                                                                                                                      | Stir frying daily with meat with daily fume-filled kitchen                                     | vs. | Stir frying meat less than daily           | 1.0 (0.6-1.4)    | age, education, birth place, fruit and vegetable consumption                                                                                                                                                              |
|                                 |                                                                                                                                                                      | Stir frying daily with meat, primarily with unsaturated oil                                    | vs. | Stir frying meat less than daily           | 1.4 (0.8-2.4)    | age, education, birth place, fruit and vegetable consumption                                                                                                                                                              |
|                                 |                                                                                                                                                                      | Stir frying daily with meat, primarily with saturated oil or saturated and unsaturated equally | vs. | Stir frying meat less than daily           | 0.9 (0.6-1.3)    | age, education, birth place, fruit and vegetable consumption                                                                                                                                                              |
| Yu <i>et al.</i> (2006) (S21)   | Case-control:<br>200 female lung cancer cases (nonsmokers)<br>285 female population controls (nonsmokers)<br>Study location: Hong Kong                               | 51-100 cooking dish-years (one dish year equals on dish cooked daily for one year)             | vs. | ≤50 cooking dish-years                     | 1.31 (0.73-2.33) | age, education, employment status, history of lung disease, family history of lung cancer, radon exposure, SHS exposure, kerosene use, firewood use, incense burning, mosquito coil use, diet, coffee and tea consumption |

Study years: 2002-2004

|                                         |     |                                           |                   |                                                                                                                                                                                                                           |
|-----------------------------------------|-----|-------------------------------------------|-------------------|---------------------------------------------------------------------------------------------------------------------------------------------------------------------------------------------------------------------------|
| 101-150 cooking dish-years              | vs. | ≤50 cooking dish-years                    | 4.12 (1.90-8.94)  | age, education, employment status, history of lung disease, family history of lung cancer, radon exposure, SHS exposure, kerosene use, firewood use, incense burning, mosquito coil use, diet, coffee and tea consumption |
| 151-200 cooking dish-years              | vs. | ≤50 cooking dish-years                    | 4.68 (1.80-12.18) | age, education, employment status, history of lung disease, family history of lung cancer, radon exposure, SHS exposure, kerosene use, firewood use, incense burning, mosquito coil use, diet, coffee and tea consumption |
| >200 cooking dish-years                 | vs. | ≤50 cooking dish-years                    | 34 (7.16-161.39)  | age, education, employment status, history of lung disease, family history of lung cancer, radon exposure, SHS exposure, kerosene use, firewood use, incense burning, mosquito coil use, diet, coffee and tea consumption |
| Sometimes heat wok to high temperatures | vs. | Never/seldom heat wok to high temperature | 1.02 (0.51-2.06)  | age, family history of lung cancer, vegetable, meat, multivitamin, and coffee consumption, total cooking dish-years                                                                                                       |
| Always heat wok to high temperatures    | vs. | Never/seldom heat wok to high temperature | 1.97 (1.06-3.65)  | age, family history of lung cancer, vegetable, meat, multivitamin, and coffee consumption, total cooking dish-years                                                                                                       |
| Ever use fume extractor                 | vs. | Never use fume extractor                  | 0.73 (0.29-1.87)  | age, family history of lung cancer, vegetable, meat, multivitamin, and coffee consumption, total cooking dish-years                                                                                                       |
| Always use peanut oil                   | vs. | Seldom/sometimes use peanut oil           | 1.36 (0.87-2.15)  | age, family history of lung cancer, vegetable, meat, multivitamin, and coffee consumption, total cooking dish-years                                                                                                       |
| Always use corn oil                     | vs. | Seldom/sometimes use corn oil             | 1.27 (0.76-2.10)  | age, family history of lung cancer, vegetable, meat, multivitamin, and coffee consumption, total cooking dish-years                                                                                                       |
| Always use canola oil                   | vs. | Seldom/sometimes use canola oil           | 1.40 (0.59-3.30)  | age, family history of lung cancer, vegetable, meat, multivitamin, and coffee consumption, total cooking dish-                                                                                                            |

---

|                                       |                                                                                                                                                                                                                     |                                                                         |     |                                   | years                                             |
|---------------------------------------|---------------------------------------------------------------------------------------------------------------------------------------------------------------------------------------------------------------------|-------------------------------------------------------------------------|-----|-----------------------------------|---------------------------------------------------|
| Sapkota <i>et al.</i><br>(2008) (S15) | Case-control:<br>177 male and female lung cancer<br>cases (never smokers)<br>457 male and female hospital<br>(patients and visitors) controls<br>(never smokers)<br>Study location: India<br>Study years: 2001-2004 | Some smokiness caused by<br>cooking                                     | vs. | No smokiness caused by<br>cooking | 1.06 (0.78-<br>1.44)                              |
|                                       |                                                                                                                                                                                                                     | Much smokiness caused by<br>cooking, but not enough to<br>irritate eyes | vs. | No smokiness caused by<br>cooking | 1.92 (1.29-<br>2.86)                              |
|                                       |                                                                                                                                                                                                                     | Much smokiness caused by<br>cooking, enough to irritate<br>eyes         | vs. | No smokiness caused by<br>cooking | 2.14 (1.28-<br>3.56)<br>$P_{\text{trend}} < 0.01$ |

Abbreviations:

|     |                      |
|-----|----------------------|
| CI  | confidence interval  |
| SES | socioeconomic status |
| SHS | secondhand smoke     |

Supplemental Table 4: Results of studies on exposure to asbestos and risk of lung cancer among never smokers

| Study                                  | Design/population                                                                                                                                                                                                            | Exposure Group                                                          | Reference Group                                                           | Risk Estimate (95% CI) | Adjustment Variables                    |
|----------------------------------------|------------------------------------------------------------------------------------------------------------------------------------------------------------------------------------------------------------------------------|-------------------------------------------------------------------------|---------------------------------------------------------------------------|------------------------|-----------------------------------------|
| <i>Community-based studies:</i>        |                                                                                                                                                                                                                              |                                                                         |                                                                           |                        |                                         |
| Morabia <i>et al.</i> (1992) (S22)     | Hospital-based case-control:<br>1793 total lung cancer cases<br>2226 total male hospital controls<br>(number of never smokers not stated)<br>Study location: USA (AL, CA, GA, IL, MI, NY, PA)<br>Study years: 1980-1989      | <10 years of asbestos exposure, any source                              | vs. Never exposed to asbestos                                             | 3.8                    | age, race, location, questionnaire type |
|                                        |                                                                                                                                                                                                                              | ≥10 years of asbestos exposure, any source                              | vs. Never exposed to asbestos                                             | 4.9                    | age, race, location, questionnaire type |
| Bovenzi <i>et al.</i> (1993) (S23)     | Case-control:<br>22 male deaths due to lung cancer (never smokers)<br>188 male controls (deaths due to other causes, never smokers)<br>Study location: Italy<br>Study years: 1979-1986                                       | Possible occupational exposure to asbestos (4 cases, 26 controls)       | vs. No occupational exposure to lung carcinogens (10 cases, 103 controls) | 1.58                   | age, date of death                      |
|                                        |                                                                                                                                                                                                                              | Definite occupational exposure to asbestos (4 cases, 19 controls)       | vs. No occupational exposure to lung carcinogens (10 cases, 103 controls) | 2.17                   | age, date of death                      |
| Brownson <i>et al.</i> (1993) (S24)    | Case-control:<br>294 female lung cancer cases ("lifetime nonsmokers")<br>1021 total female population controls (the number of lifetime nonsmokers was not stated)<br>Study location: USA (MO)<br>Study years: 1986-1991      | Ever worked with asbestos                                               | vs. Never worked with asbestos                                            | 1.5 (0.4-6.2)          | age, other lung diseases                |
| Wu-Williams <i>et al.</i> (1993) (S25) | Case-control:<br>966 female lung cancer cases (number of nonsmokers not stated)<br>960 female population controls (number of nonsmokers not stated)<br>Study location: China (Harbin and Shenyang)<br>Study years: 1985-1987 | Occupational exposure to asbestos dust (nonsmokers, 8 cases/3 controls) | vs. No occupational exposure to asbestos dust (nonsmokers)                | 3.0                    | age, education, study area              |

|                                        |                                                                                                                                                                                                           |                                                                                           |     |                                                                                                           |               |                                        |
|----------------------------------------|-----------------------------------------------------------------------------------------------------------------------------------------------------------------------------------------------------------|-------------------------------------------------------------------------------------------|-----|-----------------------------------------------------------------------------------------------------------|---------------|----------------------------------------|
| Muscat <i>et al.</i><br>(1995) (S26)   | Case-control: 83 male lung cancer cases (never smokers) 1260 male hospital controls (never smokers) Study location: USA (IL, MI, NY, PA) Study years: 1981-1991                                           | Occupational exposure to asbestos                                                         | vs. | No occupational exposure to asbestos                                                                      | 2.0 (0.9-4.6) | age, hospital                          |
| Hu <i>et al.</i> (2002)<br>(S27)       | Case-control: 161 female lung cancer cases (never smokers) 483 female population controls Study location: Canada Study years: 1994-1997                                                                   | Occupational exposure to asbestos                                                         | vs. | No occupational exposure to asbestos                                                                      | 2.3 (0.6-8.6) | age, province, education, social class |
| <i>Industry-based studies:</i>         |                                                                                                                                                                                                           |                                                                                           |     |                                                                                                           |               |                                        |
| Hammond <i>et al.</i><br>(1979) (S28)  | Cohort: 12051 male asbestos workers (891 never smokers) 450 lung cancer deaths (5 never smokers) Study location: USA, Canada Study years: 1967-1976 (follow-up began after 20 years of asbestos exposure) | Observed number of lung cancer deaths among never-smoking male asbestos workers in cohort | vs. | Expected number of lung cancer deaths among all men in the cohort                                         | 0.14          | age                                    |
|                                        |                                                                                                                                                                                                           | Observed number of lung cancer deaths among never-smoking male asbestos workers in cohort | vs. | Expected number of lung cancer deaths among never-smoking white men in a reference population (ACS study) | 5.17          | age                                    |
| Selikoff <i>et al.</i><br>(1980) (S29) | Cohort: 582 male asbestos workers (78 never smokers) 60 lung cancer deaths (8 never smokers) Study location: USA (NJ) Study years: 1961-1977 (follow-up began after 20 years of asbestos exposure)        | Observed number of lung cancer deaths among never-smoking male asbestos workers in cohort | vs. | Expected number of lung cancer deaths among never-smoking white men in a reference population (ACS study) | 0.2           | age                                    |

|                                     |                                                                                                                                                                                                                                                                                                                  |                                                                                                      |     |                                                                                                            |      |             |
|-------------------------------------|------------------------------------------------------------------------------------------------------------------------------------------------------------------------------------------------------------------------------------------------------------------------------------------------------------------|------------------------------------------------------------------------------------------------------|-----|------------------------------------------------------------------------------------------------------------|------|-------------|
| Berry <i>et al.</i><br>(1985) (S30) | Cohort: 1253 male asbestos workers (74 never smokers) and 423 female asbestos workers (118 never smokers) 64 male lung cancer deaths (1 never smoker) and 15 female lung cancer deaths (3 never smokers) Study location: UK (England) Study years: 1971-1980 (asbestos exposure initiated between 1933 and 1955) | Observed number of lung cancer deaths among never-smoking male asbestos workers in cohort            | vs. | Expected number of lung cancer deaths for males in the general population of England and Wales             | 6.2  | age         |
|                                     |                                                                                                                                                                                                                                                                                                                  | Observed number of lung cancer deaths among never-smoking female asbestos workers in cohort          | vs. | Expected number of lung cancer deaths for females in the general population of England and Wales           | 12.5 | age         |
|                                     |                                                                                                                                                                                                                                                                                                                  | Observed number of lung cancer deaths among never-smoking male and female asbestos workers in cohort | vs. | Expected number of lung cancer deaths for males and females in the general population of England and Wales | 7.3  | age, gender |
| Cheng and Kong (1992) (S31)         | Cohort: 1172 male and female asbestos workers and 3219 workers not exposed to asbestos (number of never smokers not stated) 21 deaths due to lung cancer (number of never smokers not stated) Study location: China Study years: 1972-1987 (with asbestos exposure initiated between 1955 and 1967)              | Lung cancer death rate among never-smoking asbestos workers                                          | vs. | Lung cancer death rate among never-smoking workers not exposed to asbestos or to dust, fumes or vapor      | 5.44 | age         |
| McDonald <i>et al.</i> (1993) (S32) | Cohort: 10925 men (1010 never smokers) from the 1981-1920 birth cohort employed in chrysotile production for one month or more                                                                                                                                                                                   | Observed number of lung cancer deaths among never-smoking male asbestos workers in cohort            | vs. | Expected number of lung cancer deaths for males in the general population of Quebec                        | 0.48 | not stated  |



|                                    |                                                                                                                                                                                                                           |                                                                                                                |     |                                                                                          |                  |            |
|------------------------------------|---------------------------------------------------------------------------------------------------------------------------------------------------------------------------------------------------------------------------|----------------------------------------------------------------------------------------------------------------|-----|------------------------------------------------------------------------------------------|------------------|------------|
|                                    | 642 lung cancer deaths (22 never smokers)<br>Study location: Canada (Quebec)<br>Study years: 1976-1988                                                                                                                    | Observed number of lung cancer deaths among never-smoking males in cohort with <60 mpcf.y of asbestos exposure | vs. | Expected number of lung cancer deaths for males in the general population of Quebec      | 0.37             | not stated |
|                                    |                                                                                                                                                                                                                           | Observed number of lung cancer deaths among never-smoking males in cohort with ≥60 mpcf.y of asbestos exposure | vs. | Expected number of lung cancer deaths for males in the general population of Quebec      | 0.61             | not stated |
|                                    |                                                                                                                                                                                                                           | Lung cancer SMR among never-smoking males with ≥60 mpcf.y of asbestos exposure                                 | vs. | Lung cancer SMR among never-smoking males with <60 mpcf.y of asbestos exposure           | 1.65             | not stated |
| Zhu and Wang (1993) (S33)          | Cohort:<br>5893 men and women employed in chrysotile asbestos factories (number nonsmokers not stated)<br>67 lung cancer deaths (number nonsmokers not stated)<br>Study location: China<br>Study years: 1982-1986         | Asbestos exposure among nonsmokers                                                                             | vs. | No asbestos exposure among nonsmokers                                                    | 3.8              | not stated |
| Meurman <i>et al.</i> (1994) (S34) | Cohort:<br>598 men employed in anthophyllite asbestos mines (191 nonsmokers)<br>55 lung cancer cases (2 nonsmokers)<br>Study location: Finland<br>Study years: 1968-1991 (with employment in mines between 1953 and 1967) | Observed number of lung cancer deaths among all nonsmoking males in cohort                                     | vs. | Expected number of lung cancer deaths for males in general population of eastern Finland | 0.52 (0.06-1.88) | age        |
|                                    |                                                                                                                                                                                                                           | Observed number of lung cancer deaths among males in cohort with moderate asbestos exposure                    | vs. | Expected number of lung cancer deaths for males in general population of eastern Finland | 0.58 (0.01-3.21) | age        |

|                                    |                                                                                                                                                                                                                                         |                                                                                                                                    |     |                                                                                          |                  |     |
|------------------------------------|-----------------------------------------------------------------------------------------------------------------------------------------------------------------------------------------------------------------------------------------|------------------------------------------------------------------------------------------------------------------------------------|-----|------------------------------------------------------------------------------------------|------------------|-----|
|                                    |                                                                                                                                                                                                                                         | Observed number of lung cancer deaths among males in cohort with heavy asbestos exposure                                           | vs. | Expected number of lung cancer deaths for males in general population of eastern Finland | 0.48 (0.01-2.64) | age |
| Liddell and Armstrong (2002) (S35) | Cohort:7279 men (number never smokers not stated) from the 1981-1920 birth cohort employed in chrysotile production for one month or more533 lung cancer deaths (44 never smokers)Study location: Canada (Quebec)Study years: 1950-1992 | Observed number of lung cancer deaths among never-smoking males with >0 to ≤30 mpfc.y of asbestos exposure (accumulated by age 55) | vs. | Expected number of lung cancer deaths for males in the general population of Quebec      | 0.20             | age |
|                                    |                                                                                                                                                                                                                                         | Observed number of lung cancer deaths: >30 to ≤100 mpfc.y exposure                                                                 | vs. | Expected number of lung cancer deaths: general population of Quebec                      | 0.24             | age |
|                                    |                                                                                                                                                                                                                                         | Observed number of lung cancer deaths: >100 to ≤300 mpfc.y exposure                                                                | vs. | Expected number of lung cancer deaths: general population of Quebec                      | 0.36             | age |
|                                    |                                                                                                                                                                                                                                         | Observed number of lung cancer deaths: >300 to ≤600 mpfc.y exposure                                                                | vs. | Expected number of lung cancer deaths: general population of Quebec                      | 0.53             | age |
|                                    |                                                                                                                                                                                                                                         | Observed number of lung cancer deaths: >600 to ≤1000 mpfc.y exposure                                                               | vs. | Expected number of lung cancer deaths: general population of Quebec                      | 0.76             | age |
|                                    |                                                                                                                                                                                                                                         | Lung cancer SMR among never-smoking males with 0 mpcf.y of asbestos exposure                                                       | vs. | Lung cancer SMR among never-smoking males with >100 to ≤300 mpcf.y of asbestos exposure  | 1.92             | age |

Review and pooled analyses:

|                                        |                                                                                                                                                                      |                                                            |     |                                                           |                  |            |
|----------------------------------------|----------------------------------------------------------------------------------------------------------------------------------------------------------------------|------------------------------------------------------------|-----|-----------------------------------------------------------|------------------|------------|
| Berry et al.<br>(1985) (S30)           | Meta-analysis:<br>6 studies (5 cohort, 1 case-control)<br>of male and female asbestos<br>workers<br>Study locations: Canada, UK, USA<br>Publication dates: 1968-1983 | Lung cancer SMR<br>among never-smoking<br>asbestos workers | vs. | Lung cancer SMR<br>among ever-smoking<br>asbestos workers | 1.8 (1.1-2.8)    | not stated |
| Liddell (2001)<br>Liddell FDK<br>(S36) | Meta-analysis: 13 cohort studies of<br>asbestos workers<br>Study locations:<br>Asia, Europe, North<br>America<br>Publication dates: 1972-<br>1993                    | Lung cancer SMR<br>among nonsmoking<br>asbestos workers    | vs. | Lung cancer SMR<br>among asbestos<br>workers that smoke   | 2.04 (1.28-3.25) | not stated |

Abbreviations:

ACS: American Cancer Society

CI: confidence interval

mpcf.y: million particles per cubic foot × years

SMR: standardized mortality ratio

Supplemental Table 5: Results of studies on occupational exposure to arsenic and risk of lung cancer among never smokers

| Study                                | Design/population                                                                                                                                                                                                                                                                                      | Exposure Group                                                                                              | Reference Group                                                                                                             | Risk Estimate (95% CI)                       | Adjustment Variables |
|--------------------------------------|--------------------------------------------------------------------------------------------------------------------------------------------------------------------------------------------------------------------------------------------------------------------------------------------------------|-------------------------------------------------------------------------------------------------------------|-----------------------------------------------------------------------------------------------------------------------------|----------------------------------------------|----------------------|
| Pinto <i>et al.</i> (1978) (S37)     | Cohort:<br>377 retired male copper smelters (119 never smokers)<br>21 deaths due to respiratory cancers, ICD-7 codes 160-164 (3 never smokers)<br>Study location: USA (WA)<br>Study years: 1961-1973 (with occupational arsenic exposure between 1910 and 1973)                                        | Observed number of deaths due to respiratory cancers among never-smoking men in the cohort                  | vs. Expected number of deaths due to respiratory cancers among never-smoking men in the general Washington state population | 506.5                                        | age                  |
| Higgins <i>et al.</i> (1981) (S38)   | Cohort:<br>300 male smelter workers (40 nonsmokers)<br>14 deaths due to lung cancer (1 nonsmoker)<br>Study location: USA (MT)<br>Study years: 1938-1977 (with occupational arsenic exposure before 1957)                                                                                               | Observed number of deaths due to lung cancer among nonsmoking men with heavy arsenic exposure in the cohort | vs. Expected number of deaths due to lung cancer among nonsmoking men in the general Montana state population               | 330                                          | age                  |
| Pershagen <i>et al.</i> (1981) (S39) | Case-control:<br><i>From a cohort of 3958 smelter workers:</i><br>76 male smelter workers with death due to lung cancer (8 nonsmokers)<br>152 deceased male smelter workers (52 nonsmokers)<br>Study location: Sweden<br>Study years: 1928-1977 (with occupational arsenic exposure from 1928 to 1967) | Occupational arsenic exposure (nonsmokers)                                                                  | vs. No occupational arsenic exposure                                                                                        | 2.6 (0.29-23 [calculated based on raw data]) | age                  |
|                                      |                                                                                                                                                                                                                                                                                                        | High sulfur dioxide exposure                                                                                | vs. No occupational arsenic exposure                                                                                        | 1.8                                          | age                  |
|                                      |                                                                                                                                                                                                                                                                                                        | High arsenic exposure                                                                                       | vs. No occupational arsenic exposure                                                                                        | 1.2                                          | age                  |
|                                      |                                                                                                                                                                                                                                                                                                        | Roaster worker                                                                                              | vs. No occupational arsenic exposure                                                                                        | 4.4                                          | age                  |

|                                     |                                                                                                                                                                                                                                         |                                                                                                                                                         |     |                                                                                                           |                |                              |
|-------------------------------------|-----------------------------------------------------------------------------------------------------------------------------------------------------------------------------------------------------------------------------------------|---------------------------------------------------------------------------------------------------------------------------------------------------------|-----|-----------------------------------------------------------------------------------------------------------|----------------|------------------------------|
| Welch <i>et al.</i><br>(1982) (S40) | Cohort:<br>1800 male smelter workers (240 nonsmokers)<br>80 deaths due to respiratory cancer, ICD-8 codes 160-163 (8 nonsmokers)<br>Study location: USA (MT)<br>Study years: 1938-1978 (with occupational arsenic exposure before 1957) | Observed number of deaths due to respiratory cancers among non-smoking men in cohort with low arsenic exposure intensity (<1 mg/m <sup>3</sup> )        | vs. | Expected number of deaths due to lung cancer among nonsmoking men in the general Montana state population | 95             | age                          |
|                                     |                                                                                                                                                                                                                                         | Observed number of deaths due to respiratory cancers among non-smoking men in cohort with medium arsenic exposure intensity (1-4.99 mg/m <sup>3</sup> ) | vs. | Expected number of deaths due to lung cancer among nonsmoking men in the general Montana state population | 89             | age                          |
|                                     |                                                                                                                                                                                                                                         | Observed number of deaths due to respiratory cancers among non-smoking men in cohort with high arsenic exposure intensity (5-49.99 mg/m <sup>3</sup> )  | vs. | Expected number of deaths due to lung cancer among nonsmoking men in the general Montana state population | 286            | age                          |
|                                     |                                                                                                                                                                                                                                         | Observed number of deaths due to respiratory cancers among non-smoking men in cohort with very high arsenic exposure intensity (≥50 mg/m <sup>3</sup> ) | vs. | Expected number of deaths due to lung cancer among nonsmoking men in the general Montana state population | 620            | age                          |
| Tsuda <i>et al.</i><br>(1990) (S41) | Cohort:<br>141 men and women who applied for compensation for chronic arsenic poisoning (80 nonsmokers)<br>8 deaths due to lung cancer (1 nonsmoker)<br>Study location: Japan<br>Study years: 1972-1989                                 | Observed number of deaths due to lung cancer among nonsmoking men and women in cohort who worked at a mine/refinery                                     | vs. | Expected number of lung cancer deaths in the general Japanese population                                  | 264 (13-1519)  | age, gender, calendar period |
| Jarup and Peragen,<br>(1991) (S42)  | Case-control:<br><i>From a cohort of 3916 smelter workers:</i><br>107 male smelter workers with lung cancer, all but 4 were deaths (11 nonsmokers)                                                                                      | Cumulative arsenic exposure 0.25 to <15 mg/m <sup>3</sup> *years (nonsmokers)                                                                           | vs. | Cumulative arsenic exposure <0.25 mg/m <sup>3</sup> *years (nonsmokers)                                   | 1.4 (0.1-18.4) | age                          |
|                                     |                                                                                                                                                                                                                                         | Cumulative arsenic exposure ≥15 mg/m <sup>3</sup> *years (nonsmokers)                                                                                   | vs. | Cumulative arsenic exposure <0.25 mg/m <sup>3</sup> *years (nonsmokers)                                   | 5.6 (0.6-53.8) | age                          |

|                                     |                                                                                                                                                                                                                         |                                                                                                                                                 |     |                                                                           |                |                          |
|-------------------------------------|-------------------------------------------------------------------------------------------------------------------------------------------------------------------------------------------------------------------------|-------------------------------------------------------------------------------------------------------------------------------------------------|-----|---------------------------------------------------------------------------|----------------|--------------------------|
|                                     | 214 deceased male smelter workers (42 nonsmokers)<br>Study location: Sweden<br>Study years: 1928-1981 (with occupational arsenic exposure from 1928 to 1967)                                                            | Average intensity of arsenic exposure 0.1 to <0.3 mg/m <sup>3</sup> (nonsmokers)                                                                | vs. | Average intensity of arsenic exposure <0.1 mg/m <sup>3</sup> (nonsmokers) | 2.0 (0.1-38.1) | age                      |
|                                     |                                                                                                                                                                                                                         | Average intensity of arsenic exposure ≥0.3 mg/m <sup>3</sup> (nonsmokers)                                                                       | vs. | Average intensity of arsenic exposure <0.1 mg/m <sup>3</sup> (nonsmokers) | 4.1 (0.5-35.7) | age                      |
|                                     |                                                                                                                                                                                                                         | 10-29 years of arsenic exposure                                                                                                                 | vs. | <10 years of arsenic exposure                                             | 0.5 (0.1-2.7)  | age                      |
|                                     |                                                                                                                                                                                                                         | ≥30 years of arsenic exposure                                                                                                                   | vs. | <10 years of arsenic exposure                                             | 1.0 (0.2-5.4)  | age                      |
| Brownson <i>et al.</i> (1993) (S24) | Case-control:<br>294 female lung cancer cases ("lifetime nonsmokers")<br>1021 total female population controls (the number of lifetime nonsmokers was not stated)<br>Study location: USA (MO)<br>Study years: 1986-1991 | Ever worked with arsenic                                                                                                                        | vs. | Never worked with arsenic                                                 | 1.1 (0.2-5.8)  | age, other lung diseases |
| Hazelton <i>et al.</i> (2001) (S43) | Cohort:<br>12011 male tin miners (2262 never smokers)<br>842 deaths due to lung cancer (359 never smokers)<br>Study location: China (Yunnan)<br>Study years: 1976-1988                                                  | Observed number of lung cancer deaths among never-smoking men in the cohort with no cumulative arsenic exposure                                 | vs. | Expected number of lung cancer deaths (reference population unclear)      | 11.19          | not stated               |
|                                     |                                                                                                                                                                                                                         | Observed number of lung cancer deaths among never-smoking men in the cohort with cumulative arsenic exposure 0.01-0.10 mg/m <sup>3</sup> *years | vs. | Expected number of lung cancer deaths (reference population unclear)      | 1.59           | not stated               |
|                                     |                                                                                                                                                                                                                         | Observed number of lung cancer deaths among never-smoking men in the cohort with cumulative arsenic exposure 0.10-0.61 mg/m <sup>3</sup> *years | vs. | Expected number of lung cancer deaths (reference population unclear)      | 13.83          | not stated               |

|                                  |                                                                                                                                                                                                                                                                                        |                                                                                                                                                 |     |                                                                                                    |                  |                                             |
|----------------------------------|----------------------------------------------------------------------------------------------------------------------------------------------------------------------------------------------------------------------------------------------------------------------------------------|-------------------------------------------------------------------------------------------------------------------------------------------------|-----|----------------------------------------------------------------------------------------------------|------------------|---------------------------------------------|
|                                  |                                                                                                                                                                                                                                                                                        | Observed number of lung cancer deaths among never-smoking men in the cohort with cumulative arsenic exposure 0.61-2.99 mg/m <sup>3</sup> *years | vs. | Expected number of lung cancer deaths (reference population unclear)                               | 61.89            | not stated                                  |
|                                  |                                                                                                                                                                                                                                                                                        | Observed number of lung cancer deaths among never-smoking men in the cohort with cumulative arsenic exposure 2.99-20.1 mg/m <sup>3</sup> *years | vs. | Expected number of lung cancer deaths (reference population unclear)                               | 232.39           | not stated                                  |
| Bessö <i>et al.</i> (2003) (S44) | Case-control:<br>316 male and female deaths due to bronchus or lung cancer (77 never smokers)<br>727 male and female deceased population controls (401 never smokers)<br>[Miners and smelter workers were excluded from the study]<br>Study location: Sweden<br>Study years: 1961-1990 | Men that ever lived in the 2 parishes near a smelter (never-smokers: 5 cases and 31 controls)                                                   | vs. | Men that never lived in the 2 parishes near a smelter (never-smokers: 17 cases and 211 controls)   | 2.03 (0.68-6.09) | age, gender, occupation, recruitment period |
|                                  |                                                                                                                                                                                                                                                                                        | Women that ever lived in the 2 parishes near a smelter (never-smokers: 12 cases and 31 controls)                                                | vs. | Women that never lived in the 2 parishes near a smelter (never-smokers: 43 cases and 218 controls) | 1.03 (0.48-2.20) | age, gender, occupation                     |

Abbreviations:

CI: confidence interval

Supplemental Table 6: Results of studies on occupational exposure to silica and risk of lung cancer among never smokers

| Study                                  | Design/population                                                                                                                                                                                                              | Exposure Group                                                                                                                      | Reference Group                                       | Risk Estimate (95% CI) | Adjustment Variables                                                  |
|----------------------------------------|--------------------------------------------------------------------------------------------------------------------------------------------------------------------------------------------------------------------------------|-------------------------------------------------------------------------------------------------------------------------------------|-------------------------------------------------------|------------------------|-----------------------------------------------------------------------|
| <i>Occupational silica exposure:</i>   |                                                                                                                                                                                                                                |                                                                                                                                     |                                                       |                        |                                                                       |
| Forastiere <i>et al.</i> (1986) (S45)  | Case-control:<br>72 male deaths due to cancer of the lung, bronchus, or trachea (10 nonsmokers)<br>319 deceased male population controls (85 nonsmokers)<br>Study location: Italy (Civitacastellana)<br>Study years: 1968-1984 | Ceramic worker or quarryman (all ages)                                                                                              | vs. Not a ceramic worker or quarryman (all ages)      | 1.22                   | none                                                                  |
|                                        |                                                                                                                                                                                                                                | Ceramic workers (all ages)                                                                                                          | vs. Not a ceramic worker or quarryman (all ages)      | 1.33                   | none                                                                  |
|                                        |                                                                                                                                                                                                                                | Ceramic workers that did not make compensation claims for silicosis (all ages)                                                      | vs. Not a ceramic worker or quarryman (all ages)      | 1.95                   | none                                                                  |
|                                        |                                                                                                                                                                                                                                | Ceramic worker or quarryman (<65 years old)                                                                                         | vs. Not a ceramic worker or quarryman (<65 years old) | 0.72                   | none                                                                  |
|                                        |                                                                                                                                                                                                                                | Ceramic workers (<65 years old)                                                                                                     | vs. Not a ceramic worker or quarryman (<65 years old) | 0.81                   | none                                                                  |
|                                        |                                                                                                                                                                                                                                | Ceramic workers that did not make compensation claims for silicosis (<65 years old)                                                 | vs. Not a ceramic worker or quarryman (<65 years old) | 1.30                   | none                                                                  |
|                                        |                                                                                                                                                                                                                                | Ceramic worker or quarryman (≥65 years old)                                                                                         | vs. Not a ceramic worker or quarryman (≥65 years old) | 1.73                   | none                                                                  |
|                                        |                                                                                                                                                                                                                                | Ceramic workers (≥65 years old)                                                                                                     | vs. Not a ceramic worker or quarryman (≥65 years old) | 1.86                   | none                                                                  |
|                                        |                                                                                                                                                                                                                                | Ceramic workers that did not make compensation claims for silicosis (≥65 years old)                                                 | vs. Not a ceramic worker or quarryman (≥65 years old) | 2.60                   | none                                                                  |
| Mastrangelo <i>et al.</i> (1988) (S46) | Case-control:<br>309 male lung cancer cases (6 never smokers)<br>309 male hospital controls (44 never smokers)<br>Study location: Italy (Belluno)<br>Study years: 1973-1980                                                    | Exposed to silica, not compensated for silicosis (never smokers)                                                                    | vs. Not exposed to silica (never smokers)             | 1.3 (0.0-13.8)         | age, residence location, admission date                               |
|                                        |                                                                                                                                                                                                                                | Exposed to silica, compensated for silicosis (never smokers)                                                                        | vs. Not exposed to silica (never smokers)             | 5.3 (0.5-43.5)         | age, residence location, admission date                               |
| Siemiatycki <i>et al.</i> (1990) (S47) | Case-control:<br>5 male non-adenocarcinoma lung cancer cases (never smokers)<br>1523 male hospital controls (number of never smokers not stated)                                                                               | Substantial silica exposure (cumulative silica exposure greater than the mean cumulative exposure among the exposed, never smokers) | vs. Not exposed to silica (never smokers)             | 2.6                    | age, SES, occupational exposures, education, marital status, asbestos |



|                                        |                                                                                                                                                                                                                                                             |                                                                                                                                                                                                                                                                                                       |                                 |                                                                                                                                                                                                                                  |                                                                                                  |                                                                                                                                                                                                       |
|----------------------------------------|-------------------------------------------------------------------------------------------------------------------------------------------------------------------------------------------------------------------------------------------------------------|-------------------------------------------------------------------------------------------------------------------------------------------------------------------------------------------------------------------------------------------------------------------------------------------------------|---------------------------------|----------------------------------------------------------------------------------------------------------------------------------------------------------------------------------------------------------------------------------|--------------------------------------------------------------------------------------------------|-------------------------------------------------------------------------------------------------------------------------------------------------------------------------------------------------------|
|                                        | Study location: Canada (Montreal)<br>Study years: 1979-1985                                                                                                                                                                                                 | Less than substantial silica exposure (never smokers)                                                                                                                                                                                                                                                 | vs.                             | Not exposed to silica (never smokers)                                                                                                                                                                                            | 2.0                                                                                              | age, SES, occupational exposures, education, marital status, asbestos                                                                                                                                 |
| Wu-Williams <i>et al.</i> (1993) (S25) | Case-control:<br>966 female lung cancer cases (number of nonsmokers not stated)<br>960 female population controls (number of nonsmokers not stated)<br>Study location: China (Harbin and Shenyang)<br>Study years: 1985-1987                                | Occupational exposure to silica dust (nonsmokers, 43 cases/71 controls)                                                                                                                                                                                                                               | vs.                             | No occupational exposure to silica dust (nonsmokers)                                                                                                                                                                             | 0.9                                                                                              | age, education, study area                                                                                                                                                                            |
| Zeka <i>et al.</i> (2006) (S48)        | Case-control:<br>223 male and female lung cancer cases (never-smokers)<br>1039 male and female hospital and population controls (never smokers)<br>Study location: Czech Republic, Hungary, Poland, Romania, Russia, Slovakia, UK<br>Study years: 1998-2002 | Ever occupational exposure to silica<br>>0 to 8 years of occupational exposure to silica<br>>8 years of occupational exposure to silica<br>>0 to 42.1 cumulative exposure index (intensity-frequency-years) of occupational silica exposure<br>>42.1 cumulative index of occupational silica exposure | vs.<br>vs.<br>vs.<br>vs.<br>vs. | Never occupational exposure to silica<br>Never occupational exposure to silica<br>Never occupational exposure to silica<br>Never occupational exposure to silica<br>Never occupational exposure to silica                        | 1.76 (0.97-3.21)<br>1.20 (0.49-2.92)<br>2.39 (1.11-5.15)<br>1.11 (1.43-2.88)<br>2.45 (1.15-5.20) | age, gender, study center<br>age, gender, study center, SHS exposure<br>age, gender, study center, SHS exposure<br>age, gender, study center, SHS exposure<br>age, gender, study center, SHS exposure |
| <u>Studies of silicotics:</u>          |                                                                                                                                                                                                                                                             |                                                                                                                                                                                                                                                                                                       |                                 |                                                                                                                                                                                                                                  |                                                                                                  |                                                                                                                                                                                                       |
| Zambon <i>et al.</i> (1987) (S49)      | Cohort:<br>1313 male workers compensated for silicosis during the period 1959-1963 (161 never smokers)<br>70 lung cancer deaths (8 never smokers)<br>Study location: Italy (Veneto)<br>Study years: 1959-1984                                               | Observed number of lung cancer deaths of men in cohort with 10-19 years of silicotics exposure<br>Observed number of lung cancer deaths of men in cohort with ≥20 years of silicotics exposure<br>Observed number of lung cancer deaths of men in cohort with any duration of silicotics exposure     | vs.<br>vs.<br>vs.               | Expected number of male lung cancer deaths in the Veneto region of Italy<br>Expected number of male lung cancer deaths in the Veneto region of Italy<br>Expected number of male lung cancer deaths in the Veneto region of Italy | 52 (1-292)<br>338 (70-987)<br>79 (21-201)                                                        | age, calendar period<br>age, calendar period<br>age, calendar period                                                                                                                                  |

|                                   |                                                                                                                                                                                                                                                                      |                                                                                                                                                                                                                                   |     |                                                                                  |                   |                            |
|-----------------------------------|----------------------------------------------------------------------------------------------------------------------------------------------------------------------------------------------------------------------------------------------------------------------|-----------------------------------------------------------------------------------------------------------------------------------------------------------------------------------------------------------------------------------|-----|----------------------------------------------------------------------------------|-------------------|----------------------------|
| Chiyotani et al. (1990) (S50)     | Cohort:<br>3335 men with pneumoconiosis (number of never smokers not stated)<br>60 lung cancer deaths (4 never smokers)<br>Study location: Japan<br>Study years: 1979-1983                                                                                           | Observed number of lung cancer deaths among men in cohort (never smokers)                                                                                                                                                         | vs. | Expected number of male lung cancer deaths among the general Japanese population | 2.22 (0.73-3.71)  | age                        |
| Hessel et al. (1990) (S51)        | Case-control:<br>231 white gold miners with lung cancer (gender and number of nonsmokers not stated)<br>318 white gold miner controls (gender and number of nonsmokers not stated)<br>Study location: South Africa<br>Study years: >1983 (specific dates not stated) | Silicosis of the hilar glands (nonsmokers)                                                                                                                                                                                        | vs. | No silicosis of the hilar glands (nonsmokers)                                    | 1.12              | age, age at death          |
|                                   |                                                                                                                                                                                                                                                                      | Silicosis of the parenchyma (nonsmokers)                                                                                                                                                                                          | vs. | No silicosis of the parenchyma (nonsmokers)                                      | 1.62              | age, age at death          |
|                                   |                                                                                                                                                                                                                                                                      | Silicosis of the pleura (nonsmokers)                                                                                                                                                                                              | vs. | No silicosis of the pleura (nonsmokers)                                          | 1.37              | age, age at death          |
| Amandus and Costello (1991) (S52) | Cohort:<br>9912 male metal miners (1802 never smokers)<br>132 lung cancer deaths (6 never smokers)<br>Study location: USA<br>Study years: 1959-1975                                                                                                                  | Observed number of lung cancer deaths among silicotic men in cohort (never smokers)                                                                                                                                               | vs. | Expected number of male lung cancer deaths in the general U.S. population        | 0.53 (0.01-2.95)  | age, calendar period, race |
|                                   |                                                                                                                                                                                                                                                                      | Rate of lung cancer death among silicotic cohort members (never smokers)                                                                                                                                                          | vs. | Rate of lung cancer death among nonsilicotic cohort members (never smokers)      | 3.77 (1.03-13.78) | age                        |
| Amandus et al. (1991) (S53)       | Cohort:<br>760 males diagnosed with silicosis (137 never smokers)<br>34 deaths due to cancer of the lung, trachea, or bronchus (5 never smokers)<br>Study location: USA (NC)<br>Study years: 1940-1983                                                               | Observed number of lung cancer deaths among men in cohort with silicosis diagnosed while employed in a dusty trade (mining, foundries, quarrying, stone crushing, asbestos and silica manufacturing, construction), never smokers | vs. | Expected number lung cancer deaths in the general U.S. population                | 2.0 (0.6-4.6)     | age, calendar period       |
| Carta et al. (1991) (S54)         | Cohort:<br>724 males diagnosed with silicosis between 1964 and 1970 (number of never smokers not stated)<br>22 lung cancer deaths (4 never smokers)<br>Study location: Italy (Sardinia)<br>Study years: 1964-1987                                                    | Observed number of deaths due to lung cancer among men in cohort (never smokers)                                                                                                                                                  | vs. | Expected number of male lung cancer deaths in the Sardinian region or Italy      | 0.69 (0.3-1.8)    | age, calendar period       |

|                                                   |                                                                                                                                                                                                                        |                                                                                                              |     |                                                                                             |                      |                      |
|---------------------------------------------------|------------------------------------------------------------------------------------------------------------------------------------------------------------------------------------------------------------------------|--------------------------------------------------------------------------------------------------------------|-----|---------------------------------------------------------------------------------------------|----------------------|----------------------|
| Chia <i>et al.</i><br>(1991) (S55)                | Cohort:<br>159 males diagnosed with silicosis<br>(26 never smokers)<br>9 cases of lung cancer (1 never<br>smoker)<br>Study location: Singapore<br>Study years: 1970-1984                                               | Observed incidence of lung<br>cancer among men in cohort<br>(never smokers)                                  | vs. | Expected incidence of lung<br>cancer among Chinese males in<br>Singapore                    | 1.30 (0.03-<br>7.22) | age, calendar period |
| Partanen <i>et al.</i><br>(1994) Finland<br>(S56) | Cohort:<br>811 males diagnosed with silicosis<br>between 1936 and 1977 (number of<br>never smokers not stated)<br>41 cases of lung cancer (1 never<br>smoker)<br>Study location: Finland<br>Study years: 1983-1991     | Observed incidence of lung<br>cancer among men in cohort<br>(never smokers)                                  | vs. | Expected incidence of lung<br>cancer among men in the<br>general Finnish population         | 0.44 (0.01-<br>2.43) | age, calendar period |
| Dong <i>et al.</i> (1995)<br>(S57)                | Cohort:<br>6266 male silica and clay brick<br>workers employed before 1962<br>(number of nonsmokers not stated)<br>65 deaths due to lung cancer (19<br>nonsmokers)<br>Study location: China<br>Study years: 1963-1985  | Observed number of lung<br>cancer deaths among men in<br>cohort (nonsmokers)                                 | vs. | Expected number of lung<br>cancer deaths among 11470<br>male steel workers<br>(nonsmokers)  | 1.37                 | age                  |
|                                                   |                                                                                                                                                                                                                        | Observed number of lung<br>cancer deaths among men in<br>cohort diagnosed with silicosis<br>(nonsmokers)     | vs. | Expected number of lung<br>cancer deaths among 11470<br>male steel workers<br>(nonsmokers)  | 2.13                 | age                  |
|                                                   |                                                                                                                                                                                                                        | Observed number of lung<br>cancer deaths among men in<br>cohort not diagnosed with<br>silicosis (nonsmokers) | vs. | Expected number of lung<br>cancer deaths among 11470<br>male steel workers<br>(nonsmokers)  | 0.85                 | age                  |
| Wang <i>et al.</i> (1996)<br>(S58)                | Cohort:<br>4372 males employed in<br>metallurgical mines or plants before<br>1980 (number of nonsmokers not<br>stated)<br>104 lung cancer deaths (32<br>nonsmokers)<br>Study location: China<br>Study years: 1980-1989 | Observed number of lung<br>cancer deaths among me in<br>cohort (nonsmokers)                                  | vs. | Expected number of lung<br>cancer deaths in the general<br>population (not further defined) | 209                  | age                  |

Abbreviations:

|     |                      |
|-----|----------------------|
| CI  | confidence interval  |
| SHS | secondhand smoke     |
| SES | socioeconomic status |

Supplemental Table 7: Results of studies on exposure to known (list A) or suspected (list B) occupational lung carcinogens and risk of lung cancer among never smokers

| Study                                | Design/population                                                                                                                                                                                                                                       | Exposure Group                                                                          | Reference Group                                                            | Risk Estimate (95% CI) | Adjustment Variables |
|--------------------------------------|---------------------------------------------------------------------------------------------------------------------------------------------------------------------------------------------------------------------------------------------------------|-----------------------------------------------------------------------------------------|----------------------------------------------------------------------------|------------------------|----------------------|
| Pohlabein <i>et al.</i> (2000) (S59) | Case-control:<br>650 male and female lung cancer cases (all never smokers)<br>1542 male and female hospital and population controls (all never smokers)<br>Study location: France, Germany, Italy Portugal, Spain, Sweden, UK<br>Study years: 1988-1994 | <u>Males:</u>                                                                           |                                                                            |                        |                      |
|                                      |                                                                                                                                                                                                                                                         | Ever worked in a List A or List B occupation (40 cases/165 controls)                    | vs. Never worked in a List A or List B occupation (101 cases/366 controls) | 1.20 (0.76-1.92)       | age, study center    |
|                                      |                                                                                                                                                                                                                                                         | Ever worked in a List A occupation (17 cases/58 controls)                               | vs. Never worked in a List A or List B occupation (101 cases/366 controls) | 1.52 (0.78-2.97)       | age, study center    |
|                                      |                                                                                                                                                                                                                                                         | Ever worked in a List B and never worked in a List A occupation (23 cases/107 controls) | vs. Never worked in a List A or List B occupation (101 cases/366 controls) | 1.05 (0.60-1.83)       | age, study center    |
|                                      |                                                                                                                                                                                                                                                         | <u>Females:</u>                                                                         |                                                                            |                        |                      |
|                                      |                                                                                                                                                                                                                                                         | Ever worked in a List A or List B occupation (46 cases/69 controls)                     | vs. Never worked in a List A or List B occupation (463 cases/942 controls) | 1.67 (1.10-2.52)       | age, study center    |
|                                      |                                                                                                                                                                                                                                                         | Ever worked in a List A occupation (5 cases/10 controls)                                | vs. Never worked in a List A or List B occupation (463 cases/942 controls) | 1.50 (0.49-4.53)       | age, study center    |
|                                      | Ever worked in a List B and never worked in a List A occupation (41 cases/59 controls)                                                                                                                                                                  | vs. Never worked in a List A or List B occupation (463 cases/942 controls)              | 1.69 (1.09-2.63)                                                           | age, study center      |                      |
| Kreuzer <i>et al.</i> (2001) (S60)   | Case-control:<br>58 male lung cancer cases (never smokers)<br>803 male population controls (never smokers)<br>Study location: Germany<br>Study years: 1990-1996                                                                                         | Ever worked in a List A occupation (8 cases/56 controls)                                | vs. Never worked in a List A occupation (50 cases/747 controls)            | 2.2 (1.00-4.98)        | age, region          |
|                                      |                                                                                                                                                                                                                                                         | Worked in a List A occupation <10 years (3 cases/36 controls)                           | vs. Never worked in a List A occupation (50 cases/747 controls)            | 1.3 (0.40-4.55)        | age, region          |
|                                      |                                                                                                                                                                                                                                                         | Worked in a List A occupation ≥10 years (5 cases/20 controls)                           | vs. Never worked in a List A occupation (50 cases/747 controls)            | 3.7 (1.33-10.4)        | age, region          |

|                                    |                                                                                                                                                                                                                                                             |                                                                                                  |     |                                                                        |                  |                   |
|------------------------------------|-------------------------------------------------------------------------------------------------------------------------------------------------------------------------------------------------------------------------------------------------------------|--------------------------------------------------------------------------------------------------|-----|------------------------------------------------------------------------|------------------|-------------------|
|                                    |                                                                                                                                                                                                                                                             | Ever worked in a List B and never worked in a List A occupation (12 cases/134 controls)          | vs. | Never worked in a List A or List B occupation (38 cases/613 controls)  | 1.4 (0.71-2.79)  | age, region       |
|                                    |                                                                                                                                                                                                                                                             | Ever worked in a List A occupation (8 cases/56 controls)                                         | vs. | Never worked in a List A or List B occupation (38 cases/613 controls)  | 2.4 (1.06-5.43)  | age, region       |
|                                    |                                                                                                                                                                                                                                                             | Worked in a List A or List B occupation <10 years (6 cases/68 controls)                          | vs. | Never worked in a List A or List B occupation (38 cases/613 controls)  | 1.5 (0.59-3.57)  | age, region       |
|                                    |                                                                                                                                                                                                                                                             | Worked in a List A or List B occupation ≥10 years (14 cases/122 controls)                        | vs. | Never worked in a List A or List B occupation (38 cases/613 controls)  | 1.8 (0.96-3.43)  | age, region       |
| Kreuzer <i>et al.</i> (2002) (S61) | Case-control:<br>234 female lung cancer cases (never smokers)<br>535 female population controls (never smokers)<br>Study location: Germany<br>Study years: 1991-1996                                                                                        | Ever worked in List A or List B occupation (25 cases/43 controls)                                | vs. | Never worked in a List A or List B occupation (209 cases/492 controls) | 1.32 (0.78-2.23) | age, region       |
|                                    |                                                                                                                                                                                                                                                             | Ever worked in a List B and never worked in a List A occupation (21 cases/32 controls)           | vs. | Never worked in a List A or List B occupation (209 cases/492 controls) | 1.51 (0.84-2.71) | age, region       |
|                                    |                                                                                                                                                                                                                                                             | Ever worked in a List A occupation (4 cases/11 controls)                                         | vs. | Never worked in a List A or List B occupation (209 cases/492 controls) | 0.77 (0.29-2.50) | age, region       |
|                                    |                                                                                                                                                                                                                                                             | Worked in a List A or List B occupation <10 years (9 cases/24 controls)                          | vs. | Never worked in a List A or List B occupation (209 cases/492 controls) | 0.81 (0.37-1.80) | age, region       |
|                                    |                                                                                                                                                                                                                                                             | Worked in a List A or List B occupation ≥10 years (16 cases/19 controls)                         | vs. | Never worked in a List A or List B occupation (209 cases/492 controls) | 1.99 (0.99-4.00) | age, region       |
| Zeka <i>et al.</i> (2006) (S48)    | Case-control:<br>223 male and female lung cancer cases (never-smokers)<br>1039 male and female hospital and population controls (never smokers)<br>Study location: Czech Republic, Hungary, Poland, Romania, Russia, Slovakia, UK<br>Study years: 1998-2002 | <u>Males:</u><br>Ever worked in a List A occupation (2 cases/37 controls)                        | vs. | Never worked in a List A or List B occupation (38 cases/412 controls)  | 0.43 (0.09-2.06) | age, study center |
|                                    |                                                                                                                                                                                                                                                             | Ever worked in a List B occupation and never worked in a List A occupation (8 cases/85 controls) | vs. | Never worked in a List A or List B occupation (38 cases/412 controls)  | 0.85 (0.37-1.98) | age, study center |

|                                                                                                      |     |                                                                           |                  |                   |
|------------------------------------------------------------------------------------------------------|-----|---------------------------------------------------------------------------|------------------|-------------------|
| Ever worked in a List A or List B occupation<br>(10 cases/122 controls)                              | vs. | Never worked in a List A or List B occupation<br>(38 cases/412 controls)  | 0.74 (0.34-1.61) | age, study center |
| Worked in a List A occupation 9.1-45 years<br>(2 cases/19 controls)                                  | vs. | Never worked in a List A or List B occupation<br>(38 cases/412 controls)  | 0.82 (0.16-4.32) | age, study center |
| Worked in a List B occupation 0.1-24.0 years<br>(7 cases/42 controls)                                | vs. | Never worked in a List A or List B occupation<br>(38 cases/412 controls)  | 1.81 (0.70-4.68) | age, study center |
| Worked in a List B occupation 24.1-47 years<br>(1 case/43 controls)                                  | vs. | Never worked in a List A or List B occupation<br>(38 cases/412 controls)  | 0.18 (0.02-1.41) | age, study center |
| Worked in a List A or List B occupation 0.1-21.0 years<br>(7 cases/59 controls)                      | vs. | Never worked in a List A or List B occupation<br>(38 cases/412 controls)  | 1.18 (0.47-2.98) | age, study center |
| Worked in a List A or List B occupation 21.1-47 years<br>(3 cases/63 controls)                       | vs. | Never worked in a List A or List B occupation<br>(38 cases/412 controls)  | 0.40 (0.12-1.38) | age, study center |
| <i><u>Females:</u></i>                                                                               |     |                                                                           |                  |                   |
| Ever worked in a List A occupation<br>(6 cases/16 controls)                                          | vs. | Never worked in a List A or List B occupation<br>(155 cases/462 controls) | 0.72 (0.26-2.01) | age, study center |
| Ever worked in a List B occupation and never worked in a List A occupation<br>(14 cases/27 controls) | vs. | Never worked in a List A or List B occupation<br>(155 cases/462 controls) | 1.37 (0.66-2.84) | age, study center |
| Ever worked in a List A or List B occupation<br>(20 cases/43 controls)                               | vs. | Never worked in a List A or List B occupation<br>(155 cases/462 controls) | 1.09 (0.60-2.01) | age, study center |
| Worked in a List A occupation 0.1-11.0 years<br>(2 cases/9 controls)                                 | vs. | Never worked in a List A or List B occupation<br>(155 cases/462 controls) | 0.42 (0.08-2.12) | age, study center |
| Worked in a List A occupation 11.1-47 years<br>(4 cases/7 controls)                                  | vs. | Never worked in a List A or List B occupation<br>(155 cases/462 controls) | 1.11 (0.29-4.27) | age, study center |
| Worked in a List B occupation 0.1-12.0 years<br>(7 cases/14 controls)                                | vs. | Never worked in a List A or List B occupation<br>(155 cases/462 controls) | 1.09 (0.40-2.97) | age, study center |

|                                                                                     |     |                                                                              |                      |                   |
|-------------------------------------------------------------------------------------|-----|------------------------------------------------------------------------------|----------------------|-------------------|
| Worked in a List B occupation<br>12.1-39 years<br>(7 cases/13 controls)             | vs. | Never worked in a List A or<br>List B occupation<br>(155 cases/462 controls) | 1.75 (0.63-<br>4.85) | age, study center |
| Worked in a List A or List B<br>occupation 0.1-12.0 years<br>(10 cases/22 controls) | vs. | Never worked in a List A or<br>List B occupation<br>(155 cases/462 controls) | 0.92 (0.40-<br>2.12) | age, study center |
| Worked in a List A or List B<br>occupation 12.1-47 years<br>(10 cases/21 controls)  | vs. | Never worked in a List A or<br>List B occupation<br>(155 cases/462 controls) | 1.31 (0.57-<br>3.03) | age, study center |

---

Abbreviations:

- CI confidence interval  
List A occupations and industries known to be associated with lung cancer  
List B occupations and industries suspected to be associated with lung cancer

Supplemental Table 8. Lung cancer among never smokers according to employment in specific occupations or industries

| Study                                                      | Design/population                                                                                                                                                                                                                                                                                                                                                           | Exposure Group                                                            | Reference Group           | Risk Estimate (95% CI) | Adjustment Variables |
|------------------------------------------------------------|-----------------------------------------------------------------------------------------------------------------------------------------------------------------------------------------------------------------------------------------------------------------------------------------------------------------------------------------------------------------------------|---------------------------------------------------------------------------|---------------------------|------------------------|----------------------|
| Hrubec <i>et al.</i> (1992) (S62)                          | Cohort:<br>55,049 male and female U.S. veterans (never smokers) with government life insurance policies<br>251 deaths due to respiratory system cancers (ICD-7 codes 162-163) (never smokers)<br>Study location: USA<br>Study years: 1953-1980 (with active military service during 1917-1940)<br><b>NOTE:</b> 90% confidence intervals are provided for all risk estimates | Occupation at baseline: Baker                                             | vs. All other occupations | 6.7 (2.08-21.50)       | age, calendar period |
|                                                            |                                                                                                                                                                                                                                                                                                                                                                             | Occupation at baseline: Locomotive engineer                               | vs. All other occupations | 3.2 (1.00-10.32)       | age, calendar period |
|                                                            |                                                                                                                                                                                                                                                                                                                                                                             | Occupation at baseline: Agent                                             | vs. All other occupations | 3.3 (1.28-8.65)        | age, calendar period |
|                                                            |                                                                                                                                                                                                                                                                                                                                                                             | Occupation at baseline: Salesman or sales clerk                           | vs. All other occupations | 1.6 (0.99-2.20)        | age, calendar period |
|                                                            |                                                                                                                                                                                                                                                                                                                                                                             | Occupation at baseline: Operative, kindred worker                         | vs. All other occupations | 1.7 (0.95-3.11)        | age, calendar period |
|                                                            |                                                                                                                                                                                                                                                                                                                                                                             | Occupation at baseline: Accountant or auditor                             | vs. All other occupations | 0.9 (0.45-1.60)        | age, calendar period |
|                                                            |                                                                                                                                                                                                                                                                                                                                                                             | Occupation at baseline: Lawyer or judge                                   | vs. All other occupations | 1.2 (0.74-1.97)        | age, calendar period |
|                                                            |                                                                                                                                                                                                                                                                                                                                                                             | Occupation at baseline: Manager, official, or proprietor                  | vs. All other occupations | 1.2 (0.91-1.55)        | age, calendar period |
|                                                            |                                                                                                                                                                                                                                                                                                                                                                             | Occupation at baseline: Farmer                                            | vs. All other occupations | 0.9 (0.61-1.19)        | age, calendar period |
|                                                            |                                                                                                                                                                                                                                                                                                                                                                             | Occupation at baseline: Chemical, industrial, metallic or mining engineer | vs. All other occupations | 0.9 (0.43-1.69)        | age, calendar period |
|                                                            |                                                                                                                                                                                                                                                                                                                                                                             | Occupation at baseline: Farm and home management advisor                  | vs. All other occupations | 4.0 (1.26-13.00)       | age, calendar period |
|                                                            |                                                                                                                                                                                                                                                                                                                                                                             | Occupation at baseline: physician or surgeon                              | vs. All other occupations | 0.9 (0.53-1.61)        | age, calendar period |
|                                                            |                                                                                                                                                                                                                                                                                                                                                                             | Occupation at baseline: Therapist or healer                               | vs. All other occupations | 6.1 (1.18-31.92)       | age, calendar period |
|                                                            |                                                                                                                                                                                                                                                                                                                                                                             | Occupation at baseline: Farmer                                            | vs. All other occupations | 0.9 (0.61-1.19)        | age, calendar period |
| Occupation at baseline: Building manager or superintendent | vs. All other occupations                                                                                                                                                                                                                                                                                                                                                   | 9.4 (1.81-48.80)                                                          | age, calendar period      |                        |                      |



| Study                               | Design/population                                                                                                                                                                             | Exposure Group                                      | Reference Group                              | Risk Estimate (95% CI) | Adjustment Variables     |
|-------------------------------------|-----------------------------------------------------------------------------------------------------------------------------------------------------------------------------------------------|-----------------------------------------------------|----------------------------------------------|------------------------|--------------------------|
|                                     |                                                                                                                                                                                               | Occupation at baseline: Bookbinder                  | vs. All other occupations                    | 11.4 (2.19-59.21)      | age, calendar period     |
|                                     |                                                                                                                                                                                               | Occupation at baseline: decorator or window dresser | vs. All other occupations                    | 21.9 (4.22-113.9)      | age, calendar period     |
|                                     |                                                                                                                                                                                               | Occupation at baseline: painter                     | vs. All other occupations                    | 9.6 (1.83-49.60)       | age, calendar period     |
| Brownson <i>et al.</i> (1993) (S24) | Case-control: 294 female lung cancer cases (never smokers) 1021 total female population controls (the number of never smokers was not stated) Study location: USA (MO) Study years: 1986-1991 | Ever worked in shoemaking industry                  | vs. Never worked in shoemaking industry      | 1.3 (0.8-1.9)          | age, other lung diseases |
|                                     |                                                                                                                                                                                               | Ever worked in shipbuilding industry                | vs. Never worked in shipbuilding industry    | 1.2 (0.2-6.1)          | age, other lung diseases |
|                                     |                                                                                                                                                                                               | Ever worked in a foundry                            | vs. Never worked in a foundry                | 1.9 (0.3-11.5)         | age, other lung diseases |
|                                     |                                                                                                                                                                                               | Ever worked in an iron or steel plant               | vs. Never worked in an iron or steel plant   | 0.6 (0.1-2.7)          | age, other lung diseases |
|                                     |                                                                                                                                                                                               | Ever worked in rubber industry                      | vs. Never worked in rubber industry          | 2.0 (0.3-12.2)         | age, other lung diseases |
|                                     |                                                                                                                                                                                               | Ever worked in housing construction                 | vs. Never worked in housing construction     | 1.8 (0.6-5.7)          | age, other lung diseases |
|                                     |                                                                                                                                                                                               | Ever worked in textile production                   | vs. Never worked in textile production       | 1.1 (0.6-2.0)          | age, other lung diseases |
|                                     |                                                                                                                                                                                               | Ever worked with textile dyes                       | vs. Never worked with textile dyes           | 1.2 (0.7-2.0)          | age, other lung diseases |
|                                     |                                                                                                                                                                                               | Ever worked in printing industry                    | vs. Never worked in printing industry        | 0.8 (0.3-2.0)          | age, other lung diseases |
|                                     |                                                                                                                                                                                               | Ever worked as a butcher or meat cutter             | vs. Never worked as a butcher or meat cutter | 1.0 (0.4-2.4)          | age, other lung diseases |
|                                     |                                                                                                                                                                                               | Ever worked in dry cleaning                         | vs. Never worked in dry cleaning             | 2.1 (1.2-3.7)          | age, other lung diseases |
|                                     |                                                                                                                                                                                               | Ever worked in photography                          | vs. Never worked in photography              | 0.5 (0.1-4.4)          | age, other lung diseases |
|                                     |                                                                                                                                                                                               | Ever worked in leather industry                     | vs. Never worked in leather industry         | 0.7 (0.2-2.1)          | age, other lung diseases |
|                                     |                                                                                                                                                                                               | Ever worked as a beautician                         | vs. Never worked as a beautician             | 1.2 (0.5-2.6)          | age, other lung diseases |

| Study                        | Design/population                                                                                                                                                                               | Exposure Group                                                                                                                       | Reference Group                                                                                | Risk Estimate (95% CI) | Adjustment Variables     |
|------------------------------|-------------------------------------------------------------------------------------------------------------------------------------------------------------------------------------------------|--------------------------------------------------------------------------------------------------------------------------------------|------------------------------------------------------------------------------------------------|------------------------|--------------------------|
|                              |                                                                                                                                                                                                 | Ever worked with pesticides                                                                                                          | vs. Never worked with pesticides                                                               | 3.1 (1.3-7.5)          | age, other lung diseases |
| -                            | -                                                                                                                                                                                               | Ever worked with formaldehyde                                                                                                        | vs. Never worked with formaldehyde                                                             | 0.9 (0.2-3.3)          | age, other lung diseases |
| Keller and Howe (1993) (S63) | Case-control: 897 male and female lung cancer cases (all never smokers) 3226 male and female colon cancer cases as controls (all never smokers) Study location: USA (IL) Study years: 1985-1987 | <u>White males:</u><br>Currently works in bus service and urban transit                                                              | vs. Doesn't currently work in bus service and urban transit                                    | 2.64 (1.01-6.89)       | age                      |
|                              |                                                                                                                                                                                                 | Currently works in agricultural production and crops                                                                                 | vs. Doesn't currently work in agricultural production and crops                                | 0.59 (0.48-1.74)       | age                      |
|                              |                                                                                                                                                                                                 | Currently works in construction                                                                                                      | vs. Doesn't currently work in construction                                                     | 1.27 (1.00-2.60)       | age                      |
|                              |                                                                                                                                                                                                 | Currently works in general government                                                                                                | vs. Doesn't currently work in general government                                               | 2.19 (1.10-4.36)       | age                      |
|                              |                                                                                                                                                                                                 | Currently works as motor vehicle driver                                                                                              | vs. Doesn't currently work as motor vehicle driver                                             | 0.13                   | age                      |
|                              |                                                                                                                                                                                                 | Currently works in a foundry                                                                                                         | vs. Doesn't currently work in a foundry                                                        | 1.22                   | age                      |
|                              |                                                                                                                                                                                                 | Currently works in rubber industry                                                                                                   | vs. Doesn't currently work in rubber industry                                                  | 9.16                   | age                      |
|                              |                                                                                                                                                                                                 | Currently works with aluminum                                                                                                        | vs. Doesn't currently work with aluminum                                                       | 15.33                  | age                      |
|                              |                                                                                                                                                                                                 | Currently works in an occupation known to be associated with lung cancer (motor vehicle driver, foundry, rubber, or aluminum worker) | vs. Doesn't currently work in an occupation known to be associated with lung cancer            | 0.95                   | age                      |
|                              |                                                                                                                                                                                                 | Longest lifetime occupation in trucking service                                                                                      | vs. Longest lifetime occupation not in trucking service                                        | 2.12 (1.26-3.56)       | age                      |
|                              |                                                                                                                                                                                                 | Longest lifetime occupation in blast furnaces, steelworks, rolling and finishing mills                                               | vs. Longest lifetime occupation not in blast furnaces, steelworks, rolling and finishing mills | 1.90 (1.00-3.60)       | age                      |

| Study                                  | Design/population                                                            | Exposure Group                                                                     | Reference Group                                                                            | Risk Estimate (95% CI) | Adjustment Variables       |
|----------------------------------------|------------------------------------------------------------------------------|------------------------------------------------------------------------------------|--------------------------------------------------------------------------------------------|------------------------|----------------------------|
|                                        |                                                                              | Longest lifetime occupation in construction                                        | vs. Longest lifetime occupation not in construction                                        | 1.63 (1.15-2.29)       | age                        |
|                                        |                                                                              | Longest lifetime occupation in agricultural production and crops                   | vs. Longest lifetime occupation not in agricultural production and crops                   | 0.52 (0.41-0.67)       | age                        |
|                                        |                                                                              | Longest lifetime occupation as motor vehicle driver                                | vs. Longest lifetime occupation not as motor vehicle driver                                | 1.22                   | age                        |
|                                        |                                                                              | Longest lifetime occupation as foundry worker                                      | vs. Longest lifetime occupation not as foundry worker                                      | 5.85                   | age                        |
|                                        |                                                                              | Longest lifetime occupation as rubber industry worker                              | vs. Longest lifetime occupation not as rubber industry worker                              | 8.73                   | age                        |
|                                        |                                                                              | Longest lifetime occupation in an industry known to be associated with lung cancer | vs. Longest lifetime occupation not in an industry known to be associated with lung cancer | 1.95                   | age                        |
|                                        |                                                                              | <i>Nonwhite males:</i>                                                             |                                                                                            |                        |                            |
|                                        |                                                                              | Longest lifetime occupation in justice, public order, and safety                   | vs. Longest lifetime occupation not in justice, public order, and safety                   | 0.26 (0.07-0.92)       | age                        |
|                                        |                                                                              | <i>White females:</i>                                                              |                                                                                            |                        |                            |
|                                        |                                                                              | Currently works in agricultural production and crops                               | vs. Doesn't currently work in agricultural production and crops                            | 0.08 (0.01-0.62)       | age                        |
|                                        |                                                                              | Currently works in elementary and secondary schools                                | vs. Doesn't currently work in elementary and secondary schools                             | 0.39 (0.17-0.88)       | age                        |
|                                        |                                                                              | Currently works in eating and drinking places                                      | vs. Doesn't currently work in eating and drinking places                                   | 1.92 (1.21-3.07)       | age                        |
|                                        |                                                                              | Longest lifetime occupation as a registered nurse                                  | vs. Longest lifetime occupation not as a registered nurse                                  | 1.87 (1.00-3.51)       | age                        |
| Wu-Williams <i>et al.</i> (1993) (S25) | Case-control: 966 female lung cancer cases (number of nonsmokers not stated) | Works as professional or technician (nonsmokers, 59 cases/98 controls)             | vs. Doesn't work as professional or technician (nonsmokers)                                | 0.7                    | age, education, study area |

| Study                                                     | Design/population                                                                                                                         | Exposure Group                                                                                                | Reference Group                                                                                    | Risk Estimate (95% CI) | Adjustment Variables       |
|-----------------------------------------------------------|-------------------------------------------------------------------------------------------------------------------------------------------|---------------------------------------------------------------------------------------------------------------|----------------------------------------------------------------------------------------------------|------------------------|----------------------------|
|                                                           | 960 female population controls (number of nonsmokers not stated)<br>Study location: China (Harbin and Shenyang)<br>Study years: 1985-1987 | Works as leader of state, party, or mass organizations or enterprise units (nonsmokers, 17 cases/34 controls) | vs. Doesn't work as leader of state, party, or mass organizations or enterprise units (nonsmokers) | 0.7                    | age, education, study area |
|                                                           |                                                                                                                                           | Works as office or related personnel (nonsmokers, 23 cases/37 controls)                                       | vs. Doesn't work as office or related personnel (nonsmokers)                                       | 0.9                    | age, education, study area |
|                                                           |                                                                                                                                           | Works as commercial worker (nonsmokers, 24 cases/34 controls)                                                 | vs. Doesn't work as commercial worker (nonsmokers)                                                 | 1.0                    | age, education, study area |
|                                                           |                                                                                                                                           | Works as service worker (nonsmokers, 67 cases/115 controls)                                                   | vs. Doesn't work as service worker (nonsmokers)                                                    | 0.9                    | age, education, study area |
|                                                           |                                                                                                                                           | Works in agriculture, forestry, animal husbandry, or fishing (nonsmokers, 17 cases/20 controls)               | vs. Doesn't work in agriculture, forestry, animal husbandry, or fishing (nonsmokers)               | 1.1                    | age, education, study area |
|                                                           |                                                                                                                                           | Works in production, transportation, or related work (nonsmokers, 218 cases/309 controls)                     | vs. Doesn't work in production, transportation, or related work (nonsmokers)                       | 1.0                    | age, education, study area |
|                                                           |                                                                                                                                           | Works in metal smelting and treatment (nonsmokers, 35 cases/37 controls)                                      | vs. Doesn't work in metal smelting and treatment (nonsmokers)                                      | 1.4                    | age, education, study area |
|                                                           |                                                                                                                                           | Works in gold refining (nonsmokers, 3 cases/3 controls)                                                       | vs. Doesn't work in gold refining (nonsmokers)                                                     | 1.3                    | age, education, study area |
|                                                           |                                                                                                                                           | Works in a foundry (nonsmokers, 12 cases/18 controls)                                                         | vs. Doesn't work in a foundry (nonsmokers)                                                         | 0.9                    | age, education, study area |
| Works with metal heaters (nonsmokers, 4 cases/2 controls) | vs. Doesn't work with metal heaters (nonsmokers)                                                                                          | 2.7                                                                                                           | age, education, study area                                                                         |                        |                            |

| Study | Design/population | Exposure Group                                                                              | Reference Group                                                                  | Risk Estimate (95% CI) | Adjustment Variables       |
|-------|-------------------|---------------------------------------------------------------------------------------------|----------------------------------------------------------------------------------|------------------------|----------------------------|
|       |                   | Works with metal pressers (nonsmokers, 4 cases/9 controls)                                  | vs. Doesn't work with metal pressers (nonsmokers)                                | 0.6                    | age, education, study area |
|       |                   | Works with metal surfacers (nonsmokers, 11 cases/4 controls)                                | vs. Doesn't work with metal surfacers (nonsmokers)                               | 4.2                    | age, education, study area |
|       |                   | Works in chemical industry (nonsmokers, 9 cases/12 controls)                                | vs. Doesn't work in chemical industry (nonsmokers)                               | 1.2                    | age, education, study area |
|       |                   | Works in rubber and plastic industry (nonsmokers, 14 cases/20 controls)                     | vs. Doesn't work in rubber and plastic industry (nonsmokers)                     | 1.1                    | age, education, study area |
|       |                   | Works in textile, knitting, printing, or dyeing industry (nonsmokers, 30 cases/36 controls) | vs. Doesn't work in textile, knitting, printing, or dyeing industry (nonsmokers) | 0.5                    | age, education, study area |
|       |                   | Works in food and beverage manufacturing (nonsmokers, 7 cases/14 controls)                  | vs. Doesn't work in food and beverage manufacturing (nonsmokers)                 | 0.7                    | age, education, study area |
|       |                   | Works in timber processing (nonsmokers, 14 cases/13 controls)                               | vs. Doesn't work in timber processing (nonsmokers)                               | 1.5                    | age, education, study area |
|       |                   | Works as metal forger or tool maker (nonsmokers, 19 cases/43 controls)                      | vs. Doesn't work as metal forger or tool maker (nonsmokers)                      | 0.6                    | age, education, study area |
|       |                   | Works as machinery or precision instrument assembler (nonsmokers, 12 cases/12 controls)     | vs. Doesn't work as machinery or precision instrument assembler (nonsmokers)     | 1.5                    | age, education, study area |
|       |                   | Works in electrical or electrical equipment (nonsmokers, 8 cases/9 controls)                | vs. Doesn't work in electrical or electrical equipment (nonsmokers)              | 1.5                    | age, education, study area |

| Study | Design/population | Exposure Group                                                                                             | Reference Group                                                                                 | Risk Estimate (95% CI) | Adjustment Variables       |
|-------|-------------------|------------------------------------------------------------------------------------------------------------|-------------------------------------------------------------------------------------------------|------------------------|----------------------------|
|       |                   | Works as pipe fitter, welder, coldworker, or metal component installer (nonsmokers, 13 cases/10 controls)  | vs. Doesn't work as pipe fitter, welder, coldworker, or metal component installer (nonsmokers)  | 1.6                    | age, education, study area |
|       |                   | Works as a welder (nonsmokers, 5 cases/1 control)                                                          | vs. Doesn't work as a welder (nonsmokers)                                                       | 5.8                    | age, education, study area |
|       |                   | Works as a puncher or cutter (nonsmokers, 8 cases/7 controls)                                              | vs. Doesn't work as a puncher of cutter (nonsmokers)                                            | 1.5                    | age, education, study area |
|       |                   | Works as a painter (nonsmokers, 15 cases/17 controls)                                                      | vs. Doesn't work as a painter (nonsmokers)                                                      | 1.3                    | age, education, study area |
|       |                   | Works in construction (nonsmokers, 8 cases/22 controls)                                                    | vs. Doesn't work in construction (nonsmokers)                                                   | 0.5                    | age, education, study area |
|       |                   | Works in machine loading or other relating equipment operation (nonsmokers, 8 cases/11 controls)           | vs. Doesn't work in machine loading or other related equipment operation (nonsmokers)           | 1.1                    | age, education, study area |
|       |                   | Works in inspection (nonsmokers, 16 cases/23 controls)                                                     | vs. Doesn't work in inspection (nonsmokers)                                                     | 0.8                    | age, education, study area |
|       |                   | Works as personnel in other production, transportation, or related work (nonsmokers, 23 cases/38 controls) | vs. Doesn't work as personnel in other production, transportation, or related work (nonsmokers) | 0.8                    | age, education, study area |
|       |                   | Occupational exposure to wood dust (nonsmokers, 30 cases/30 controls)                                      | vs. No occupational exposure to wood dust (nonsmokers)                                          | 1.3                    | age, education, study area |
|       |                   | Occupational exposure to coal dust (nonsmokers, 43 cases/48 controls)                                      | vs. No occupational exposure to coal dust (nonsmokers)                                          | 1.4                    | age, education, study area |

| Study                         | Design/population                                                                                                                                   | Exposure Group                                                                      | Reference Group                                                      | Risk Estimate (95% CI) | Adjustment Variables                   |
|-------------------------------|-----------------------------------------------------------------------------------------------------------------------------------------------------|-------------------------------------------------------------------------------------|----------------------------------------------------------------------|------------------------|----------------------------------------|
|                               |                                                                                                                                                     | Occupational exposure to textile fiber (nonsmokers, 37 cases/60 controls)           | vs. No occupational exposure to textile fiber (nonsmokers)           | 0.9                    | age, education, study area             |
|                               |                                                                                                                                                     | Occupational exposure to oxides (nonsmokers, 34 cases/56 controls)                  | vs. No occupational exposure to oxides (nonsmokers)                  | 0.9                    | age, education, study area             |
|                               |                                                                                                                                                     | Occupational exposure to metal dust (nonsmokers, 20 cases/40 controls)              | vs. No occupational exposure to metal dust (nonsmokers)              | 0.7                    | age, education, study area             |
|                               |                                                                                                                                                     | Occupational exposure to unknown dust (nonsmokers, 27 cases/39 controls)            | vs. No occupational exposure to unknown dust (nonsmokers)            | 1.1                    | age, education, study area             |
|                               |                                                                                                                                                     | Occupational exposure to other dust (nonsmokers, 58 cases/62 controls)              | vs. No occupational exposure to other dust (nonsmokers)              | 1.4                    | age, education, study area             |
|                               |                                                                                                                                                     | Occupational exposure to smoke from burning fuel (nonsmokers, 47 cases/43 controls) | vs. No occupational exposure to smoke from burning fuel (nonsmokers) | 1.6                    | age, education, study area             |
|                               |                                                                                                                                                     | Occupational exposure to chemical fumes (nonsmokers, 79 cases/87 controls)          | vs. No occupational exposure to chemical fumes (nonsmokers)          | 1.4                    | age, education, study area             |
|                               |                                                                                                                                                     | Occupational exposure to coke oven emissions (nonsmokers, 20 cases/19 controls)     | vs. No occupational exposure to coke oven emissions (nonsmokers)     | 1.5                    | age, education, study area             |
| Hu <i>et al.</i> (2002) (S27) | Case-control:<br>161 female lung cancer cases (never smokers)<br>483 female population controls<br>Study location: Canada<br>Study years: 1994-1997 | Occupational exposure to mineral, cutting, or lubricating oil                       | vs. No occupational exposure to mineral, cutting, or lubricating oil | 0.5 (0.1-4.5)          | age, province, education, social class |
|                               |                                                                                                                                                     | Occupational exposure to pesticides                                                 | vs. No occupational exposure to pesticides                           | 1.7 (0.7-3.7)          | age, province, education, social class |
|                               |                                                                                                                                                     | Occupational exposure to herbicides                                                 | vs. No occupational exposure to herbicides                           | 1.7 (0.7-4.1)          | age, province, education, social class |

| Study                              | Design/population                                                                                                                                                    | Exposure Group                                                                                     | Reference Group                                                                                                                       | Risk Estimate (95% CI) | Adjustment Variables                   |
|------------------------------------|----------------------------------------------------------------------------------------------------------------------------------------------------------------------|----------------------------------------------------------------------------------------------------|---------------------------------------------------------------------------------------------------------------------------------------|------------------------|----------------------------------------|
|                                    |                                                                                                                                                                      | Occupational exposure to wood dust                                                                 | vs. No occupational exposure to wood dust                                                                                             | 0.7 (0.3-1.8)          | age, province, education, social class |
| Kreuzer <i>et al.</i> (2002) (S61) | Case-control:<br>234 female lung cancer cases (never smokers)<br>535 female population controls (never smokers)<br>Study location: Germany<br>Study years: 1991-1996 | Ever worked in copper smelting, zinc smelting, cadmium alloy production, aluminum production, etc. | vs. Never worked in an occupation/ industry known or suspected to be associated with lung cancer (i.e., List A or List B occupations) | 0.55 (0.12-2.66)       | age, region                            |
|                                    |                                                                                                                                                                      | Ever worked as a painter                                                                           | vs. Never worked in an occupation/ industry known or suspected to be associated with lung cancer                                      | 1.19 (0.20-7.22)       | age, region                            |
|                                    |                                                                                                                                                                      | Ever worked as a butcher or meat cutter                                                            | vs. Never worked in an occupation/ industry known or suspected to be associated with lung cancer                                      | 1.14 (0.27-4.73)       | age, region                            |
|                                    |                                                                                                                                                                      | Ever worked in the wood industry as a carpenter or joiner                                          | vs. Never worked in an occupation/ industry known or suspected to be associated with lung cancer                                      | 13.35 (1.59-112.2)     | age, region                            |
|                                    |                                                                                                                                                                      | Ever worked in printing industry                                                                   | vs. Never worked in an occupation/ industry known or suspected to be associated with lung cancer                                      | 4.60 (0.73-28.95)      | age, region                            |
|                                    |                                                                                                                                                                      | Ever worked in rubber industry                                                                     | vs. Never worked in an occupation/ industry known or suspected to be associated with lung cancer                                      | 0.83 (0.16-4.34)       | age, region                            |
|                                    |                                                                                                                                                                      | Ever worked in ceramics, pottery, or glass industries                                              | vs. Never worked in an occupation/ industry known or suspected to be associated with lung cancer                                      | 1.57 (0.44-5.65)       | age, region                            |
|                                    |                                                                                                                                                                      | Ever worked in laundry or dry cleaning                                                             | vs. Never worked in an occupation/ industry known or suspected to be associated with lung cancer                                      | 0.69 (0.22-2.19)       | age, region                            |



| Study                                         | Design/population                                                                                                                                                                                                                                           | Exposure Group                                                                                                                 | Reference Group                                                 | Risk Estimate (95% CI) | Adjustment Variables                    |
|-----------------------------------------------|-------------------------------------------------------------------------------------------------------------------------------------------------------------------------------------------------------------------------------------------------------------|--------------------------------------------------------------------------------------------------------------------------------|-----------------------------------------------------------------|------------------------|-----------------------------------------|
| Zeka <i>et al.</i> (2006) (S48)               | Case-control:<br>223 male and female lung cancer cases (never-smokers)<br>1039 male and female hospital and population controls (never smokers)<br>Study location: Czech Republic, Hungary, Poland, Romania, Russia, Slovakia, UK<br>Study years: 1998-2002 | Occupational exposure to mineral fibers                                                                                        | vs. No occupational exposure to mineral fibers                  | 1.39 (0.75-2.57)       | age, gender, study center               |
|                                               |                                                                                                                                                                                                                                                             | Occupational exposure to nonferrous metal dust and fumes                                                                       | vs. No occupational exposure to nonferrous metal dust and fumes | 1.73 (1.02-2.92)       | age, gender, study center               |
|                                               |                                                                                                                                                                                                                                                             | >0 to 25 years of occupational exposure to nonferrous metal dust and fumes                                                     | vs. No occupational exposure to nonferrous metal dust and fumes | 1.19 (0.58-2.46)       | age, gender, study center, SHS exposure |
|                                               |                                                                                                                                                                                                                                                             | >25 years of occupational exposure to nonferrous metal dust and fumes                                                          | vs. No occupational exposure to nonferrous metal dust and fumes | 2.52 (1.28-4.95)       | age, gender, study center, SHS exposure |
|                                               |                                                                                                                                                                                                                                                             | >0 to 4405.0 cumulative exposure index (intensity-frequency-years) of occupational exposure to nonferrous metal dust and fumes | vs. No occupational exposure to nonferrous metal dust and fumes | 1.29 (0.62-2.69)       | age, gender, study center, SHS exposure |
|                                               |                                                                                                                                                                                                                                                             | >4405.0 cumulative exposure index of occupational exposure to nonferrous metal dust and fumes                                  | vs. No occupational exposure to nonferrous metal dust and fumes | 2.25 (1.16-4.37)       | age, gender, study center, SHS exposure |
|                                               |                                                                                                                                                                                                                                                             | Occupational exposure to ferrous metals                                                                                        | vs. No occupational exposure to ferrous metals                  | 0.88 (0.55-1.40)       | age, gender, study center               |
|                                               |                                                                                                                                                                                                                                                             | Occupational exposure to combustion fumes                                                                                      | vs. No occupational exposure to combustion fumes                | 1.26 (0.67-2.37)       | age, gender, study center               |
|                                               |                                                                                                                                                                                                                                                             | Occupational exposure to engine emissions                                                                                      | vs. No occupational exposure to engine emissions                | 0.91 (0.55-1.51)       | age, gender, study center               |
|                                               |                                                                                                                                                                                                                                                             | Occupational exposure to diesel/petroleum fuel                                                                                 | vs. No occupational exposure to diesel/petroleum fuel           | 1.35 (0.86-2.09)       | age, gender, study center               |
| Occupational exposure to welding fumes        | vs. No occupational exposure to welding fumes                                                                                                                                                                                                               | 0.97 (0.54-1.75)                                                                                                               | age, gender, study center                                       |                        |                                         |
| Occupational exposure to metal working fluids | vs. No occupational exposure to metal working fluids                                                                                                                                                                                                        | 0.88 (0.58-1.32)                                                                                                               | age, gender, study center                                       |                        |                                         |

| Study | Design/population | Exposure Group                                                                                                  | Reference Group                                                  | Risk Estimate (95% CI) | Adjustment Variables                    |
|-------|-------------------|-----------------------------------------------------------------------------------------------------------------|------------------------------------------------------------------|------------------------|-----------------------------------------|
|       |                   | Occupational exposure to polycyclic aromatic hydrocarbons                                                       | vs. No occupational exposure to polycyclic aromatic hydrocarbons | 0.80 (0.52-1.23)       | age, gender, study center               |
|       |                   | Occupational exposure to organic solvents                                                                       | vs. No occupational exposure to organic solvents                 | 1.46 (0.94-2.24)       | age, gender, study center               |
|       |                   | >0 to 16 years of occupational exposure to organic solvents                                                     | vs. No occupational exposure to organic solvents                 | 1.22 (0.68-2.17)       | age, gender, study center, SHS exposure |
|       |                   | >16 years of occupational exposure to organic solvents                                                          | vs. No occupational exposure to organic solvents                 | 1.64 (0.91-2.93)       | age, gender, study center, SHS exposure |
|       |                   | >0 to 6125.0 cumulative exposure index (intensity-frequency-years) of occupational exposure to organic solvents | vs. No occupational exposure to organic solvents                 | 1.18 (0.64-2.17)       | age, gender, study center, SHS exposure |
|       |                   | >6125.0 cumulative exposure index of occupational exposure to organic solvents                                  | vs. No occupational exposure to organic solvents                 | 1.75 (1.01-3.03)       | age, gender, study center, SHS exposure |
|       |                   | Occupational exposure to plastic pyrolysis products                                                             | vs. No occupational exposure to plastic pyrolysis products       | 1.18 (0.59-2.38)       | age, gender, study center               |

Supplemental Table 9. Results of studies on exposure to air pollutants and risk of lung cancer among never-smokers

| Study                             | Design/population                                                                                                                                                                                                                                                                                                 | Exposure Group                                                       | Reference Group                                                          | Risk Estimate (95% CI) | Adjustment Variables                                                         |
|-----------------------------------|-------------------------------------------------------------------------------------------------------------------------------------------------------------------------------------------------------------------------------------------------------------------------------------------------------------------|----------------------------------------------------------------------|--------------------------------------------------------------------------|------------------------|------------------------------------------------------------------------------|
| Nyberg <i>et al.</i> (2000) (S64) | Case-control:<br>36 male lung cancer cases (never smokers)<br>705 male population controls (never smokers)<br>Study location: Sweden (Stockholm)<br>Study years: 1985-1990 for case and control selection; 1994-1996 for collection of exposure information, with air pollution exposure occurring from 1950-1990 | Exposure to >29.3µg/m <sup>3</sup> NO <sub>2</sub> from road traffic | vs. Exposure to ≤29.3µg/m <sup>3</sup> NO <sub>2</sub> from road traffic | 1.68 (0.67-4.19)       | age, calendar year, radon, SES, occupational exposures, high-risk occupation |
| Pope <i>et al.</i> (2002) (S)     | Cohort study:<br>359,000 male and female CPS-II cohort members (number of never smokers not stated)<br>Number of lung cancer cases not stated<br>Study location: USA (51 cities)<br>Study years: 1979-1983                                                                                                        | Per 10µg/m <sup>3</sup> increase in PM <sub>2.5</sub> concentration  | vs. Not exposed to PM <sub>2.5</sub> (not defined)                       | 1.14 (0.94-1.39)       | age, gender, education                                                       |

CI confidence interval

NO<sub>2</sub> nitrogen dioxide

SES socioeconomic status

PM<sub>2.5</sub> particulate matter <2.5µm in diameter

Supplemental Table 10: Results of studies on diet and risk of lung cancer among never smokers

| Study                                | Design/population                                                                                                                                                                                         | Exposure Group                        | Reference Group                          | Risk Estimate (95% CI)                        | Adjustment Variables                                           |
|--------------------------------------|-----------------------------------------------------------------------------------------------------------------------------------------------------------------------------------------------------------|---------------------------------------|------------------------------------------|-----------------------------------------------|----------------------------------------------------------------|
| <b><i>Fruit:</i></b>                 |                                                                                                                                                                                                           |                                       |                                          |                                               |                                                                |
| Koo (1988) (S66)                     | Case-control:<br>88 female lung cancer cases (never smokers)<br>137 female population controls (never smokers)<br>Study location: Hong Kong<br>Study years: 1981-1983                                     | Highest tertile of fruit consumption  | vs. Lowest tertile of fruit consumption  | 0.4 (0.19-0.92)<br>P <sub>trend</sub> = 0.002 | age, number of live births, schooling                          |
| Kalandidi <i>et al.</i> (1990) (S67) | Case-control:<br>91 female lung cancer cases (nonsmokers)<br>120 female hospital controls (nonsmokers)<br>Study location: Greece<br>Study years: 1987-1989                                                | Highest quartile of fruit consumption | vs. Lowest quartile of fruit consumption | 0.3 (0.10-0.74)                               | age, education, interviewer, total energy intake, SHS exposure |
| Candelora <i>et al.</i> (1992) (S68) | Case-control:<br>124 female lung cancer cases (never smokers)<br>263 female population controls (never smokers)<br>Study location: USA (FL)<br>Study years: 1987-not stated                               | Highest quartile of fruit consumption | vs. Lowest quartile of fruit consumption | 0.6 (0.30-1.10)<br>P <sub>trend</sub> = 0.04  | age, education, energy intake                                  |
| Steinmetz <i>et al.</i> (1993) (S69) | Case-control:<br><i>From a cohort of 41,837 women</i><br>19 female lung cancer cases (never smokers)<br>1804 female cohort controls (never smokers)<br>Study location: USA (IA)<br>Study years: 1986-1989 | Highest quartile of fruit consumption | vs. Lowest quartile of fruit consumption | 1.45 (0.33-6.30)<br>P <sub>trend</sub> = 0.03 | age, energy intake                                             |
| Hu <i>et al.</i> (1997) (S70)        | Case-control:<br>81 male and female lung cancer cases (never smokers)<br>115 male and female hospital controls (never smokers)<br>Study location: China (Heilongjiang)<br>Study years: 1985-1987          | Highest quartile of fruit consumption | vs. Lowest quartile of fruit consumption | 0.6 (0.3-1.2)                                 | age, gender, family income                                     |

|                                       |                                                                                                                                                                                                                                               |                                       |     |                                      |                  |                                                                                                                                            |
|---------------------------------------|-----------------------------------------------------------------------------------------------------------------------------------------------------------------------------------------------------------------------------------------------|---------------------------------------|-----|--------------------------------------|------------------|--------------------------------------------------------------------------------------------------------------------------------------------|
| Nyberg <i>et al.</i><br>(1998) (S71)  | Case-control:<br>124 male and female lung cancer cases (never smokers)<br>235 male and female population controls (never smokers)<br>Study location: Sweden<br>Study years: 1989-1995                                                         | High fruit index consumption          | vs. | Low fruit index consumption          | 0.67 (0.33-1.36) | age, gender, catchment area, carrot and other fruit consumption, occasional smoking, urban residence, occupational exposures, SHS exposure |
| Brennan <i>et al.</i><br>(2000) (S72) | Case-control:<br>506 male and female lung cancer cases (nonsmokers)<br>1045 male and female hospital and population controls (nonsmokers)<br>Study location: France, Germany, Italy, Spain, Sweden, United Kingdom<br>Study years: not stated | Highest tertile of fruit consumption  | vs. | Lowest tertile of fruit consumption  | 1.0 (0.6-1.5)    | age, gender, study center                                                                                                                  |
| Mulder <i>et al.</i><br>(2000) (S73)  | Ecological:<br>12763 men from 16 cohorts (2822 never smokers)<br>24 male lung cancer deaths (never smokers)<br>Study location: Croatia, Finland, Greece, Italy, Japan, the Netherlands, Serbia, USA<br>Study years: 1958-1987                 | Per 13g increase in fruit consumption | vs. | No fruit consumption                 | 0.99 (0.93-1.04) | average age and energy intake                                                                                                              |
| Hu <i>et al.</i><br>(2002) (S27)      | Case-control:<br>161 female lung cancer cases (never smokers)<br>483 female population controls<br>Study location: Canada<br>Study years: 1994-1997                                                                                           | Highest quartile of fruit consumption | vs. | Lowest quartile of fruit consumption | 1.1 (0.6-2.0)    | age, province, education, social class, energy intake                                                                                      |
| Seow <i>et al.</i><br>(2002) (S74)    | Case-Control:<br>176 female lung cancer cases (never smokers)<br>663 female hospital controls (never smokers)<br>Study location: Singapore<br>Study years: 1996-1998                                                                          | ≥9.7 servings of fruit per week       | vs. | <3.8 servings of fruit per week      | 0.69 (0.43-1.10) | age, birthplace, family history of cancer, soy consumption, number of live births, length of menstrual cycle                               |

|                                         |                                                                                                                                                                                                  |                                                    |     |                                                  |                                               |                                                                                                                                            |
|-----------------------------------------|--------------------------------------------------------------------------------------------------------------------------------------------------------------------------------------------------|----------------------------------------------------|-----|--------------------------------------------------|-----------------------------------------------|--------------------------------------------------------------------------------------------------------------------------------------------|
| Kreuzer <i>et al.</i><br>(2002) (S61)   | Case-control:<br>234 female lung cancer cases (never smokers)<br>535 female population controls (never smokers)<br>Study location: Germany<br>Study years: 1991-1996                             | Daily fruit consumption                            | vs. | Weekly or less fruit consumption                 | 0.66 (0.37-1.19)                              | age, region                                                                                                                                |
| Liu <i>et al.</i><br>(2004) (S75)       | Cohort:<br>93339 men and women (55968 never smokers)<br>106 male and female lung cancer cases (never smokers)<br>Study location: Japan<br>Study years: 1990-1999                                 | High fruit consumption                             | vs. | Low fruit consumption                            | 2.09 (0.56-7.83)                              | age, gender, area, sports, alcohol consumption, BMI, vitamin consumption, salted fish and meat consumption, pickled vegetable consumption  |
| Galeone <i>et al.</i><br>(2007) (S76)   | Case-control:<br>61 male and female lung cancer cases (never smokers)<br>217 male and female hospital controls (never smokers)<br>Study location: China (Heilongjiang)<br>Study years: 1987-1990 | Low fruit consumption                              | vs. | High fruit consumption                           | 1.25 (0.70-2.26)                              | age, gender, income, urban/rural residence, family history of cancer, coal heating or cooking                                              |
| <b><u>Fruits (non-citrus):</u></b>      |                                                                                                                                                                                                  |                                                    |     |                                                  |                                               |                                                                                                                                            |
| Nyberg <i>et al.</i><br>(1998) (S71)    | Case-control:<br>124 male and female lung cancer cases (never smokers)<br>235 male and female population controls (never smokers)<br>Study location: Sweden<br>Study years: 1989-1995            | Daily or almost daily non-citrus fruit consumption | vs. | Once weekly or less non-citrus fruit consumption | 0.49 (0.25-0.94)<br>P <sub>trend</sub> = 0.03 | age, gender, catchment area, carrot and other fruit consumption, occasional smoking, urban residence, occupational exposures, SHS exposure |
| <b><u>Citrus fruit (oranges):</u></b>   |                                                                                                                                                                                                  |                                                    |     |                                                  |                                               |                                                                                                                                            |
| Candelora <i>et al.</i><br>(1992) (S68) | Case-control:<br>124 female lung cancer cases (never smokers)<br>263 female population controls (never smokers)<br>Study location: USA (FL)<br>Study years: 1987-not stated                      | Highest quartile of citrus fruit consumption       | vs. | Lowest quartile of citrus fruit consumption      | 0.6 (0.30-1.10)                               | age, education, energy intake                                                                                                              |

|                                |                                                                                                                                                                                                                                               |                                                          |     |                                                        |                                            |                                                                                                                                            |
|--------------------------------|-----------------------------------------------------------------------------------------------------------------------------------------------------------------------------------------------------------------------------------------------|----------------------------------------------------------|-----|--------------------------------------------------------|--------------------------------------------|--------------------------------------------------------------------------------------------------------------------------------------------|
| Nyberg et al.<br>(1998) (S71)  | Case-control:<br>124 male and female lung cancer cases (never smokers)<br>235 male and female population controls (never smokers)<br>Study location: Sweden<br>Study years: 1989-1995                                                         | Daily or almost daily citrus fruit and juice consumption | vs. | Once weekly or less citrus fruit and juice consumption | 1.52 (0.82-2.81)                           | age, gender, catchment area, carrot and other fruit consumption, occasional smoking, urban residence, occupational exposures, SHS exposure |
| Ozasa et al.<br>(2001) (S77)   | Cohort:<br>51588 women (never smokers)<br>101 female deaths due to lung cancer (never smokers)<br>Study location: Japan<br>Study years: 1988-1997                                                                                             | 3-4 oranges per week                                     | vs. | ≤1-2 oranges per month                                 | 1.18 (0.54-2.57)                           | age, family history of lung cancer                                                                                                         |
| <b><u>Tomatoes:</u></b>        |                                                                                                                                                                                                                                               |                                                          |     |                                                        |                                            |                                                                                                                                            |
| Nyberg et al.<br>(1998) (S71)  | Case-control:<br>124 male and female lung cancer cases (never smokers)<br>235 male and female population controls (never smokers)<br>Study location: Sweden<br>Study years: 1989-1995                                                         | Daily or almost daily tomato consumption                 | vs. | Once weekly or less tomato consumption                 | 0.79 (0.43-1.46)                           | age, gender, catchment area, carrot and other fruit consumption, occasional smoking, urban residence, occupational exposures, SHS exposure |
| Brennan et al.<br>(2000) (S72) | Case-control:<br>506 male and female lung cancer cases (nonsmokers)<br>1045 male and female hospital and population controls (nonsmokers)<br>Study location: France, Germany, Italy, Spain, Sweden, United Kingdom<br>Study years: not stated | Highest tertile of tomato consumption                    | vs. | Lowest tertile of tomato consumption                   | 0.5 (0.4-0.6)<br>P <sub>trend</sub> = 0.01 | age, gender, study center                                                                                                                  |
| Hu et al.<br>(2002) (S27)      | Case-control:<br>161 female lung cancer cases (never smokers)<br>483 female population controls<br>Study location: Canada<br>Study years: 1994-1997                                                                                           | Highest quartile of tomato consumption                   | vs. | Lowest quartile of tomato consumption                  | 0.7 (0.3-1.4)                              | age, province, education, social class, energy intake                                                                                      |

**Vegetables:**

|                                            |                                                                                                                                                                                                           |                                                       |     |                                                      |                                                |                                                                                                                                          |
|--------------------------------------------|-----------------------------------------------------------------------------------------------------------------------------------------------------------------------------------------------------------|-------------------------------------------------------|-----|------------------------------------------------------|------------------------------------------------|------------------------------------------------------------------------------------------------------------------------------------------|
| Kalandidi <i>et al.</i><br>(1990) (S67)    | Case-control:<br>91 female lung cancer cases (nonsmokers)<br>120 female hospital controls (nonsmokers)<br>Study location: Greece<br>Study years: 1987-1989                                                | Highest quartile of<br>vegetable<br>consumption       | vs. | Lowest quartile of<br>vegetable consumption          | 1.1 (0.44-2.68)                                | age, education,<br>interviewer, total energy<br>intake                                                                                   |
| Candelora <i>et al.</i><br>(1992)<br>(S68) | Case-control:<br>124 female lung cancer cases (never smokers)<br>263 female population controls (never<br>smokers)<br>Study location: USA (FL)<br>Study years: 1987-not stated                            | Highest quartile of<br>vegetable<br>consumption       | vs. | Lowest quartile of<br>vegetable consumption          | 0.2 (0.10-0.50)<br>P <sub>trend</sub> = <0.001 | age, education, energy<br>intake, fruit consumption                                                                                      |
| Steinmetz <i>et al.</i><br>(1993) (S69)    | Case-control:<br><i>From a cohort of 41,837 women</i><br>19 female lung cancer cases (never smokers)<br>1804 female cohort controls (never smokers)<br>Study location: USA (IA)<br>Study years: 1986-1989 | Highest quartile of<br>vegetable<br>consumption       | vs. | Lowest quartile of<br>vegetable consumption          | 1.08 (0.27-4.39)                               | age, energy intake                                                                                                                       |
| Hu <i>et al.</i><br>(1997) (S70)           | Case-control:<br>81 male and female lung cancer cases (never<br>smokers)<br>115 male and female hospital controls (never<br>smokers)<br>Study location: China (Heilongjiang)<br>Study years: 1985-1987    | Highest quartile of<br>fresh vegetable<br>consumption | vs. | Lowest quartile of<br>fresh vegetable<br>consumption | 0.6 (0.3-1.5)                                  | age, gender, family<br>income                                                                                                            |
| Nyberg <i>et al.</i><br>(1998) (S71)       | Case-control:<br>124 male and female lung cancer cases (never<br>smokers)<br>235 male and female population controls<br>(never smokers)<br>Study location: Sweden<br>Study years: 1989-1995               | High vegetable index<br>consumption                   | vs. | Low vegetable index<br>consumption                   | 0.57 (0.29-1.13)                               | age, gender, catchment<br>area, fruit consumption,<br>occasional smoking,<br>urban residence,<br>occupational exposures,<br>SHS exposure |



|                                       |                                                                                                                                                                                                                                                        |                                                      |     |                                                      |                                               |                                                                                                                          |
|---------------------------------------|--------------------------------------------------------------------------------------------------------------------------------------------------------------------------------------------------------------------------------------------------------|------------------------------------------------------|-----|------------------------------------------------------|-----------------------------------------------|--------------------------------------------------------------------------------------------------------------------------|
| Brennan <i>et al.</i><br>(2000) (S72) | Case-control:<br>506 male and female lung cancer cases<br>(nonsmokers)<br>1045 male and female hospital and population<br>controls (nonsmokers)<br>Study location: France, Germany, Italy, Spain,<br>Sweden, United Kingdom<br>Study years: not stated | Highest tertile of fresh<br>vegetable<br>consumption | vs. | Lowest tertile of fresh<br>vegetable consumption     | 0.7 (0.5-1.0)                                 | age, gender, study center                                                                                                |
| Mulder <i>et al.</i><br>(2000) (S73)  | Ecological:<br>12763 men from 16 cohorts (2822 never<br>smokers)<br>24 male lung cancer deaths (never smokers)<br>Study location: Croatia, Finland, Greece, Italy,<br>Japan, the Netherlands, Serbia, USA<br>Study years: 1958-1987                    | Per 18g increase in<br>vegetable<br>consumption      | vs. | No vegetable<br>consumption                          | 0.86 (0.67-1.08)                              | average age and energy<br>intake                                                                                         |
| Hu <i>et al.</i><br>(2002) (S27)      | Case-control:<br>161 female lung cancer cases (never smokers)<br>483 female population controls<br>Study location: Canada<br>Study years: 1994-1997                                                                                                    | Highest quartile of<br>vegetable<br>consumption      | vs. | Lowest quartile of<br>vegetable consumption          | 1.4 (0.7-3.0)                                 | age, province, education,<br>social class, energy<br>intake                                                              |
| Kreuzer <i>et al.</i><br>(2002) (S61) | Case-control:<br>234 female lung cancer cases (never smokers)<br>535 female population controls (never<br>smokers)<br>Study location: Germany<br>Study years: 1991-1996                                                                                | Daily consumption of<br>fresh vegetables             | vs. | Weekly or less<br>consumption of fresh<br>vegetables | 0.45 (0.25-0.82)<br>P <sub>trend</sub> = 0.03 | age, region                                                                                                              |
| Seow <i>et al.</i><br>(2002) (S20)    | Case-Control:<br>176 female lung cancer cases (never smokers)<br>663 female hospital controls (never smokers)<br>Study location: Singapore<br>Study years: 1996-1998                                                                                   | ≥26.4 servings of<br>vegetables per week             | vs. | <14.3 servings of<br>vegetables per week             | 0.78 (0.51-1.20)                              | age, birthplace, family<br>history of cancer, soy<br>consumption, number of<br>live births, length of<br>menstrual cycle |

|                                         |                                                                                                                                                                                                                                               |                                                             |     |                                                        |                  |                                                                                                                                           |
|-----------------------------------------|-----------------------------------------------------------------------------------------------------------------------------------------------------------------------------------------------------------------------------------------------|-------------------------------------------------------------|-----|--------------------------------------------------------|------------------|-------------------------------------------------------------------------------------------------------------------------------------------|
| Liu <i>et al.</i><br>(2004) (S75)       | Cohort:<br>93339 men and women (55968 never smokers)<br>106 male and female lung cancer cases (never smokers)<br>Study location: Japan<br>Study years: 1990-1999                                                                              | High vegetable consumption                                  | vs. | Low vegetable consumption                              | 1.37 (0.79-2.37) | age, gender, area, sports, alcohol consumption, BMI, vitamin consumption, salted fish and meat consumption, pickled vegetable consumption |
| Galeone <i>et al.</i><br>(2007) (S76)   | Case-control:<br>61 male and female lung cancer cases (never smokers)<br>217 male and female hospital controls (never smokers)<br>Study location: China (Heilongjiang)<br>Study years: 1987-1990                                              | Low vegetable intake                                        | vs. | High vegetable intake                                  | 1.72 (0.96-3.07) | age, gender, income, urban/rural residence, family history of cancer, coal heating or cooking                                             |
| <b><u>Vegetables (cruciferous):</u></b> |                                                                                                                                                                                                                                               |                                                             |     |                                                        |                  |                                                                                                                                           |
| Koo (1988)<br>(S66)                     | Case-control:<br>88 female lung cancer cases (never smokers)<br>137 female population controls (never smokers)<br>Study location: Hong Kong<br>Study years: 1981-1983                                                                         | Highest tertile of cruciferous vegetable consumption        | vs. | Lowest tertile of cruciferous vegetable consumption    | 0.96             | age, number of live births, schooling                                                                                                     |
| Nyberg <i>et al.</i><br>(1998) (S71)    | Case-control:<br>124 male and female lung cancer cases (never smokers)<br>235 male and female population controls (never smokers)<br>Study location: Sweden<br>Study years: 1989-1995                                                         | More than once weekly consumption of cruciferous vegetables | vs. | Less than weekly consumption of cruciferous vegetables | 1.06 (0.58-1.92) | age, gender, catchment area, carrot and fruit consumption, occasional smoking, urban residence, occupational exposures, SHS exposure      |
| Brennan <i>et al.</i><br>(2000) (S72)   | Case-control:<br>506 male and female lung cancer cases (nonsmokers)<br>1045 male and female hospital and population controls (nonsmokers)<br>Study location: France, Germany, Italy, Spain, Sweden, United Kingdom<br>Study years: not stated | Highest tertile of cruciferous vegetable consumption        | vs. | Lowest tertile of cruciferous vegetable consumption    | 1.1 (0.7-1.6)    | age, gender, study center                                                                                                                 |

|                                         |                                                                                                                                                                                                    |                                                             |     |                                                            |                   |                                                                                                                          |
|-----------------------------------------|----------------------------------------------------------------------------------------------------------------------------------------------------------------------------------------------------|-------------------------------------------------------------|-----|------------------------------------------------------------|-------------------|--------------------------------------------------------------------------------------------------------------------------|
| Hu <i>et al.</i><br>(2002) (S27)        | Case-control:<br>161 female lung cancer cases (never smokers)<br>483 female population controls<br>Study location: Canada<br>Study years: 1994-1997                                                | Highest quartile of<br>cruciferous vegetable<br>consumption | vs. | Lowest quartile of<br>cruciferous vegetable<br>consumption | 0.8 (0.4-1.4)     | age, province, education,<br>social class, energy<br>intake                                                              |
| Seow <i>et al.</i><br>(2002) (S20)      | Case-Control:<br>176 female lung cancer cases (never smokers)<br>663 female hospital controls (never smokers)<br>Study location: Singapore<br>Study years: 1996-1998                               | ≥14.3 servings of<br>cruciferous vegetables<br>per week     | vs. | <7.5 servings of<br>cruciferous vegetables<br>per week     | 0.89 (0.59-1.35)  | age, birthplace, family<br>history of cancer, soy<br>consumption, number of<br>live births, length of<br>menstrual cycle |
| <b><u>Broccoli:</u></b>                 |                                                                                                                                                                                                    |                                                             |     |                                                            |                   |                                                                                                                          |
| Steinmetz <i>et al.</i><br>(1993) (S69) | Case-control:<br>From a cohort of 41,837 women<br>19 female lung cancer cases (never smokers)<br>1804 female cohort controls (never smokers)<br>Study location: USA (IA)<br>Study years: 1986-1989 | Highest quartile of<br>broccoli consumption                 | vs. | Lowest quartile of<br>broccoli consumption                 | 2.01 (0.36-11.20) | age, energy intake                                                                                                       |
| Hu <i>et al.</i><br>(2002) (S27)        | Case-control:<br>161 female lung cancer cases (never smokers)<br>483 female population controls<br>Study location: Canada<br>Study years: 1994-1997                                                | Highest quartile of<br>broccoli consumption                 | vs. | Lowest quartile of<br>broccoli consumption                 | 0.6 (0.2-1.8)     | age, province, education,<br>social class, energy<br>intake                                                              |
| <b><u>Vegetables (leafy green):</u></b> |                                                                                                                                                                                                    |                                                             |     |                                                            |                   |                                                                                                                          |
| Koo (1988)<br>(S66)                     | Case-control:<br>88 female lung cancer cases (never smokers)<br>137 female population controls (never<br>smokers)<br>Study location: Hong Kong<br>Study years: 1981-1983                           | Highest tertile of leafy<br>green vegetable<br>consumption  | vs. | Lowest tertile of leafy<br>green vegetable<br>consumption  | 0.5               | age, number of live<br>births, schooling                                                                                 |
| Steinmetz <i>et al.</i><br>(1993) (S69) | Case-control:<br>From a cohort of 41,837 women<br>19 female lung cancer cases (never smokers)<br>1804 female cohort controls (never smokers)<br>Study location: USA (IA)<br>Study years: 1986-1989 | Highest quartile of<br>leafy green vegetable<br>consumption | vs. | Lowest quartile of<br>leafy green vegetable<br>consumption | 0.84 (0.25-2.76)  | age, energy intake                                                                                                       |

|                                              |                                                                                                                                                                                       |                                                         |     |                                                            |                                                |                                                                                                                                      |
|----------------------------------------------|---------------------------------------------------------------------------------------------------------------------------------------------------------------------------------------|---------------------------------------------------------|-----|------------------------------------------------------------|------------------------------------------------|--------------------------------------------------------------------------------------------------------------------------------------|
| Nyberg <i>et al.</i><br>(1998) (S71)         | Case-control:<br>124 male and female lung cancer cases (never smokers)<br>235 male and female population controls (never smokers)<br>Study location: Sweden<br>Study years: 1989-1995 | Daily or almost daily leafy green vegetable consumption | vs. | Once weekly or less leafy green vegetable consumption      | 1.09 (0.59-2.00)                               | age, gender, catchment area, carrot and fruit consumption, occasional smoking, urban residence, occupational exposures, SHS exposure |
| Ozasa <i>et al.</i><br>(2001) (S77)          | Cohort:<br>51588 women (never smokers)<br>101 female deaths due to lung cancer (never smokers)<br>Study location: Japan<br>Study years: 1988-1997                                     | Leafy green vegetable consumption almost every day      | vs. | Leafy green vegetable consumption 2 times per week or less | 1.35 (0.79-2.30)                               | age, family history of lung cancer                                                                                                   |
| <b><u>Vegetables (green and yellow):</u></b> |                                                                                                                                                                                       |                                                         |     |                                                            |                                                |                                                                                                                                      |
| Candelora <i>et al.</i> (1992) (S68)         | Case-control:<br>124 female lung cancer cases (never smokers)<br>263 female population controls (never smokers)<br>Study location: USA (FL)<br>Study years: 1987-not stated           | Highest quartile of green and yellow vegetable intake   | vs. | Lowest quartile of green and yellow vegetable intake       | 0.4 (0.20-0.70)<br>P <sub>trend</sub> = <0.001 | age, education, total energy intake, fruit consumption                                                                               |
| Hu <i>et al.</i><br>(2002) (S27)             | Case-control:<br>161 female lung cancer cases (never smokers)<br>483 female population controls<br>Study location: Canada<br>Study years: 1994-1997                                   | Highest quartile of green and yellow vegetable intake   | vs. | Lowest quartile of green and yellow vegetable intake       | 1.1 (0.6-2.1)                                  | age, province, education, social class, energy intake                                                                                |
| <b><u>Carrots:</u></b>                       |                                                                                                                                                                                       |                                                         |     |                                                            |                                                |                                                                                                                                      |
| Koo (1988) (S66)                             | Case-control:<br>88 female lung cancer cases (never smokers)<br>137 female population controls (never smokers)<br>Study location: Hong Kong<br>Study years: 1981-1983                 | Highest tertile of carrot consumption                   | vs. | Lowest tertile of carrot consumption                       | 0.5                                            | age, number of live births, schooling                                                                                                |

|                                       |                                                                                                                                                                                                                                                        |                                                                |     |                                                   |                                               |                                                                                                                                          |
|---------------------------------------|--------------------------------------------------------------------------------------------------------------------------------------------------------------------------------------------------------------------------------------------------------|----------------------------------------------------------------|-----|---------------------------------------------------|-----------------------------------------------|------------------------------------------------------------------------------------------------------------------------------------------|
| Steinmetz et al.<br>(1993) (S69)      | Case-control:<br>From a cohort of 41,837 women<br>19 female lung cancer cases (never smokers)<br>1804 female cohort controls (never smokers)<br>Study location: USA (IA)<br>Study years: 1986-1989                                                     | Highest tertile of<br>carrot consumption                       | vs. | Lowest tertile of carrot<br>consumption           | 1.19 (0.43-3.28)                              | age, energy intake                                                                                                                       |
| Nyberg <i>et al.</i><br>(1998) (S71)  | Case-control:<br>124 male and female lung cancer cases (never<br>smokers)<br>235 male and female population controls<br>(never smokers)<br>Study location: Sweden<br>Study years: 1989-1995                                                            | Daily or almost daily<br>carrot consumption                    | vs. | Less than weekly carrot<br>consumption            | 0.55 (0.27-1.11)<br>P <sub>trend</sub> = 0.05 | age, gender, catchment<br>area, fruit consumption,<br>occasional smoking,<br>urban residence,<br>occupational exposures,<br>SHS exposure |
| Brennan <i>et al.</i><br>(2000) (S72) | Case-control:<br>506 male and female lung cancer cases<br>(nonsmokers)<br>1045 male and female hospital and population<br>controls (nonsmokers)<br>Study location: France, Germany, Italy, Spain,<br>Sweden, United Kingdom<br>Study years: not stated | Highest tertile of<br>carrot consumption                       | vs. | Lowest tertile of carrot<br>consumption           | 0.8 (0.5-1.1)                                 | age, gender, study center                                                                                                                |
| Hu <i>et al.</i><br>(2002) (S27)      | Case-control:<br>161 female lung cancer cases (never smokers)<br>483 female population controls<br>Study location: Canada<br>Study years: 1994-1997                                                                                                    | Highest tertile of<br>carrot consumption                       | vs. | Lowest tertile of carrot<br>consumption           | 0.6 (0.3-1.1)                                 | age, province, education,<br>social class, energy<br>intake                                                                              |
| Kreuzer <i>et al.</i><br>(2002) (S61) | Case-control:<br>234 female lung cancer cases (never smokers)<br>535 female population controls (never<br>smokers)<br>Study location: Germany<br>Study years: 1991-1996                                                                                | Daily or several times<br>weekly consumption<br>of raw carrots | vs. | Less than montly<br>consumption of raw<br>carrots | 0.91 (0.55-1.48)                              | age, region                                                                                                                              |

**Lettuce:**

|                                       |                                                                                                                                                                                                                                                        |                                                    |     |                                                   |                                            |                                                             |
|---------------------------------------|--------------------------------------------------------------------------------------------------------------------------------------------------------------------------------------------------------------------------------------------------------|----------------------------------------------------|-----|---------------------------------------------------|--------------------------------------------|-------------------------------------------------------------|
| Brennan <i>et al.</i><br>(2000) (S72) | Case-control:<br>506 male and female lung cancer cases<br>(nonsmokers)<br>1045 male and female hospital and population<br>controls (nonsmokers)<br>Study location: France, Germany, Italy, Spain,<br>Sweden, United Kingdom<br>Study years: not stated | Highest tertile of<br>lettuce consumption          | vs. | Lowest tertile of lettuce<br>consumption          | 0.6 (0.3-1.2)<br>P <sub>trend</sub> = 0.02 | age, gender, study center                                   |
| Kreuzer <i>et al.</i><br>(2002) (S61) | Case-control:<br>234 female lung cancer cases (never smokers)<br>535 female population controls (never<br>smokers)<br>Study location: Germany<br>Study years: 1991-1996                                                                                | Daily lettuce<br>consumption                       | vs. | Less than weekly<br>consumption of lettuce        | 1.23 (0.74-2.05)                           | age, region                                                 |
| <b><u>Beans/legumes:</u></b>          |                                                                                                                                                                                                                                                        |                                                    |     |                                                   |                                            |                                                             |
| Koo (1988)<br>(S66)                   | Case-control:<br>88 female lung cancer cases (never smokers)<br>137 female population controls (never<br>smokers)<br>Study location: Hong Kong<br>Study years: 1981-1983                                                                               | Highest tertile of<br>beans/legumes<br>consumption | vs. | Lowest tertile of<br>beans/legumes<br>consumption | 1.4                                        | age, number of live<br>births, schooling                    |
| Brennan <i>et al.</i><br>(2000) (S72) | Case-control:<br>506 male and female lung cancer cases<br>(nonsmokers)<br>1045 male and female hospital and population<br>controls (nonsmokers)<br>Study location: France, Germany, Italy, Spain,<br>Sweden, United Kingdom<br>Study years: not stated | Highest tertile of<br>legumes consumption          | vs. | Lowest tertile of<br>legumes consumption          | 1.1 (0.9-1.3)                              | age, gender, study center                                   |
| Hu <i>et al.</i><br>(2002) (S27)      | Case-control:<br>161 female lung cancer cases (never smokers)<br>483 female population controls<br>Study location: Canada<br>Study years: 1994-1997                                                                                                    | Highest tertile of<br>lentils consumption          | vs. | Lowest tertile of lentils<br>consumption          | 0.7 (0.4-1.3)                              | age, province, education,<br>social class, energy<br>intake |

**Vegetables and fruits:**

|                                  |                                                                                                                                                                                                                                                        |                                                           |     |                                                          |                  |                                                                                                                                                             |
|----------------------------------|--------------------------------------------------------------------------------------------------------------------------------------------------------------------------------------------------------------------------------------------------------|-----------------------------------------------------------|-----|----------------------------------------------------------|------------------|-------------------------------------------------------------------------------------------------------------------------------------------------------------|
| Steinmetz et al.<br>(1993) (S69) | Case-control:<br>From a cohort of 41,837 women<br>19 female lung cancer cases (never smokers)<br>1804 female cohort controls (never smokers)<br>Study location: USA (IA)<br>Study years: 1986-1989                                                     | Highest quartile of<br>fruit and vegetable<br>consumption | vs. | Lowest quartile of fruit<br>and vegetable<br>consumption | 0.76 (0.19-3.03) | age, energy intake                                                                                                                                          |
| Hu et al.<br>(2002) (S27)        | Case-control:<br>161 female lung cancer cases (never smokers)<br>483 female population controls<br>Study location: Canada<br>Study years: 1994-1997                                                                                                    | Highest quartile of<br>fruit and vegetable<br>consumption | vs. | Lowest quartile of fruit<br>and vegetable<br>consumption | 1.3 (0.6-2.6)    | age, province, education,<br>social class, energy<br>intake                                                                                                 |
| Liu et al.<br>(2004) (S75)       | Cohort:<br>93339 men and women (55968 never smokers)<br>106 male and female lung cancer cases (never<br>smokers)<br>Study location: Japan<br>Study years: 1990-1999                                                                                    | High fruit and<br>vegetable<br>consumption                | vs. | Low fruit and<br>vegetable consumption                   | 1.95 (0.84-4.52) | age, gender, area, sports,<br>alcohol consumption,<br>BMI, vitamin<br>consumption, salted fish<br>and meat consumption,<br>pickled vegetable<br>consumption |
| Galeone et al.<br>(2007) (S76)   | Case-control:<br>61 male and female lung cancer cases (never<br>smokers)<br>217 male and female hospital controls (never<br>smokers)<br>Study location: China (Heilongjiang)<br>Study years: 1987-1990                                                 | Low fruit and<br>vegetable<br>consumption                 | vs. | High fruit and<br>vegetable consumption                  | 1.56 (0.87-2.81) | age, gender, income,<br>urban/rural residence,<br>family history of cancer,<br>coal heating or cooking                                                      |
| <b><u>Meat:</u></b>              |                                                                                                                                                                                                                                                        |                                                           |     |                                                          |                  |                                                                                                                                                             |
| Brennan et al.<br>(2000) (S72)   | Case-control:<br>506 male and female lung cancer cases<br>(nonsmokers)<br>1045 male and female hospital and population<br>controls (nonsmokers)<br>Study location: France, Germany, Italy, Spain,<br>Sweden, United Kingdom<br>Study years: not stated | Highest tertile of meat<br>consumption                    | vs. | Lowest tertile of meat<br>consumption                    | 1.1 (0.8-1.6)    | age, gender, study center                                                                                                                                   |

|                                       |                                                                                                                                                                                             |                                                      |     |                                                  |                                               |                                                                                                                                                     |
|---------------------------------------|---------------------------------------------------------------------------------------------------------------------------------------------------------------------------------------------|------------------------------------------------------|-----|--------------------------------------------------|-----------------------------------------------|-----------------------------------------------------------------------------------------------------------------------------------------------------|
| Hu <i>et al.</i><br>(2002) (S27)      | Case-control:<br>161 female lung cancer cases (never smokers)<br>483 female population controls<br>Study location: Canada<br>Study years: 1994-1997                                         | Highest quartile of<br>meat consumption              | vs. | Lowest quartile of meat<br>consumption           | 1.9 (1.0-3.6)<br>P <sub>trend</sub> = 0.04    | age, province, education,<br>social class, energy<br>intake                                                                                         |
| Kreuzer <i>et al.</i><br>(2002) (S61) | Case-control:<br>234 female lung cancer cases (never smokers)<br>535 female population controls (never<br>smokers)<br>Study location: Germany<br>Study years: 1991-1996                     | Daily meat<br>consumption                            | vs. | Weekly or less meat<br>consumption               | 1.61 (0.90-2.89)                              | age, region                                                                                                                                         |
| <b><u>Smoked Meat:</u></b>            |                                                                                                                                                                                             |                                                      |     |                                                  |                                               |                                                                                                                                                     |
| Koo (1988)<br>(S66)                   | Case-control:<br>88 female lung cancer cases (never smokers)<br>137 female population controls (never<br>smokers)<br>Study location: Hong Kong<br>Study years: 1981-1983                    | Highest tertile of<br>smoked meat<br>consumption     | vs. | Lowest tertile of<br>smoked meat<br>consumption  | 0.9                                           | age, number of live<br>births, schooling                                                                                                            |
| Hu <i>et al.</i><br>(2002) (S27)      | Case-control:<br>161 female lung cancer cases (never smokers)<br>483 female population controls<br>Study location: Canada<br>Study years: 1994-1997                                         | Highest tertile of<br>smoked meat<br>consumption     | vs. | Lowest tertile of<br>smoked meat<br>consumption  | 2.1 (1.1-4.0)                                 | age, province, education,<br>social class, energy<br>intake                                                                                         |
| <b><u>Fish:</u></b>                   |                                                                                                                                                                                             |                                                      |     |                                                  |                                               |                                                                                                                                                     |
| Koo (1988)<br>(S66)                   | Case-control:<br>88 female lung cancer cases (never smokers)<br>137 female population controls (never<br>smokers)<br>Study location: Hong Kong<br>Study years: 1981-1983                    | Highest tertile of fish<br>consumption               | vs. | Lowest tertile of fish<br>consumption            | 0.4 (0.16-0.75)<br>P <sub>trend</sub> = 0.017 | age, number of live<br>births, schooling                                                                                                            |
| Nyberg <i>et al.</i><br>(1998) (S71)  | Case-control:<br>124 male and female lung cancer cases (never<br>smokers)<br>235 male and female population controls<br>(never smokers)<br>Study location: Sweden<br>Study years: 1989-1995 | Weekly or more often<br>consumption of fatty<br>fish | vs. | Less than montly<br>consumption of fatty<br>fish | 0.61 (0.32-1.19)                              | age, gender, catchment<br>area, fruit and carrot<br>consumption, occasional<br>smoking, urban<br>residence, occupational<br>exposures, SHS exposure |



|                                       |                                                                                                                                                                                                                                                        |                                                                 |     |                                                             |                                                |                                                             |
|---------------------------------------|--------------------------------------------------------------------------------------------------------------------------------------------------------------------------------------------------------------------------------------------------------|-----------------------------------------------------------------|-----|-------------------------------------------------------------|------------------------------------------------|-------------------------------------------------------------|
| Brennan <i>et al.</i><br>(2000) (S72) | Case-control:<br>506 male and female lung cancer cases<br>(nonsmokers)<br>1045 male and female hospital and population<br>controls (nonsmokers)<br>Study location: France, Germany, Italy, Spain,<br>Sweden, United Kingdom<br>Study years: not stated | Highest tertile of fish<br>consumption                          | vs. | Lowest tertile of fish<br>consumption                       | 1.0 (0.9-1.2)                                  | age, gender, study center                                   |
| Kreuzer <i>et al.</i><br>(2002) (S61) | Case-control:<br>234 female lung cancer cases (never smokers)<br>535 female population controls (never<br>smokers)<br>Study location: Germany<br>Study years: 1991-1996                                                                                | Consumption of fish<br>daily or several times<br>weekly         | vs. | Consumption of fish<br>less than weekly                     | 0.86 (0.52-1.42)                               | age, region                                                 |
| <b><u>Ham and Sausages:</u></b>       |                                                                                                                                                                                                                                                        |                                                                 |     |                                                             |                                                |                                                             |
| Ozasa <i>et al.</i><br>(2001) (S77)   | Cohort:<br>51588 women (never smokers)<br>101 female deaths due to lung cancer (never<br>smokers)<br>Study location: Japan<br>Study years: 1988-1997                                                                                                   | Ham and sausage<br>consumption 3-4<br>times per week or<br>more | vs. | Ham and sausage<br>consumption less than<br>twice per month | 2.02 (1.15-3.53)<br>P <sub>trend</sub> = 0.017 | age, family history of<br>lung cancer                       |
| <b><u>Sausages:</u></b>               |                                                                                                                                                                                                                                                        |                                                                 |     |                                                             |                                                |                                                             |
| Hu <i>et al.</i><br>(2002) (S27)      | Case-control:<br>161 female lung cancer cases (never smokers)<br>483 female population controls<br>Study location: Canada<br>Study years: 1994-1997                                                                                                    | Highest quartile of<br>sausage consumption                      | vs. | Lowest quartile of<br>sausage consumption                   | 0.7 (0.2-2.5)                                  | age, province, education,<br>social class, energy<br>intake |
| Kreuzer <i>et al.</i><br>(2002) (S61) | Case-control:<br>234 female lung cancer cases (never smokers)<br>535 female population controls (never<br>smokers)<br>Study location: Germany<br>Study years: 1991-1996                                                                                | Daily sausage<br>consumption                                    | vs. | Weekly or less sausage<br>consumption                       | 0.99 (0.61-1.62)                               | age, region                                                 |
| <b><u>Liver:</u></b>                  |                                                                                                                                                                                                                                                        |                                                                 |     |                                                             |                                                |                                                             |

|                                       |                                                                                                                                                                                                                                               |                                              |     |                                            |                  |                                                                                                                                      |
|---------------------------------------|-----------------------------------------------------------------------------------------------------------------------------------------------------------------------------------------------------------------------------------------------|----------------------------------------------|-----|--------------------------------------------|------------------|--------------------------------------------------------------------------------------------------------------------------------------|
| Nyberg <i>et al.</i><br>(1998) (S71)  | Case-control:<br>124 male and female lung cancer cases (never smokers)<br>235 male and female population controls (never smokers)<br>Study location: Sweden<br>Study years: 1989-1995                                                         | Liver consumption monthly or more often      | vs. | Never eat liver                            | 1.18 (0.62-2.26) | age, gender, catchment area, fruit and carrot consumption, occasional smoking, urban residence, occupational exposures, SHS exposure |
| Brennan <i>et al.</i><br>(2000) (S72) | Case-control:<br>506 male and female lung cancer cases (nonsmokers)<br>1045 male and female hospital and population controls (nonsmokers)<br>Study location: France, Germany, Italy, Spain, Sweden, United Kingdom<br>Study years: not stated | Highest tertile of liver consumption         | vs. | Lowest tertile of liver consumption        | 1.0 (0.8-1.3)    | age, gender, study center                                                                                                            |
| Ozasa <i>et al.</i><br>(2001) (S77)   | Cohort:<br>51588 women (never smokers)<br>101 female deaths due to lung cancer (never smokers)<br>Study location: Japan<br>Study years: 1988-1997                                                                                             | Liver consumption 3-4 times per week or more | vs. | Liver consumption twice a month or less    | 2.29 (0.95-5.47) | age, family history of lung cancer                                                                                                   |
| Kreuzer <i>et al.</i><br>(2002) (S61) | Case-control:<br>234 female lung cancer cases (never smokers)<br>535 female population controls (never smokers)<br>Study location: Germany<br>Study years: 1991-1996                                                                          | Highest tertile of liver consumption         | vs. | Lowest tertile of liver consumption        | 0.80 (0.51-1.26) | age, region                                                                                                                          |
| <b><u>Fat (cholesterol):</u></b>      |                                                                                                                                                                                                                                               |                                              |     |                                            |                  |                                                                                                                                      |
| Wu <i>et al.</i><br>(1994) (S78)      | Cohort:<br>34,708 women (nonsmokers)<br>34 female lung cancer cases (nonsmokers)<br>Study location: USA (IA)<br>Study years: 1986-1991                                                                                                        | Highest quartile of cholesterol consumption  | vs. | Lowest quartile of cholesterol consumption | 0.9 (0.30-2.50)  | age, occupation, physical activity, energy intake                                                                                    |

|                                       |                                                                                                                                                                                                                                               |                                              |     |                                           |                  |                                                   |
|---------------------------------------|-----------------------------------------------------------------------------------------------------------------------------------------------------------------------------------------------------------------------------------------------|----------------------------------------------|-----|-------------------------------------------|------------------|---------------------------------------------------|
| Mulder <i>et al.</i><br>(2000) (S73)  | Ecological:<br>12763 men from 16 cohorts (2822 never smokers)<br>24 male lung cancer deaths (never smokers)<br>Study location: Croatia, Finland, Greece, Italy, Japan, the Netherlands, Serbia, USA<br>Study years: 1958-1987                 | Per 40mg increase in cholesterol consumption | vs. | No cholesterol consumption                | 0.99 (0.86-1.16) | average age and energy intake                     |
| <b><u>Total Fat:</u></b>              |                                                                                                                                                                                                                                               |                                              |     |                                           |                  |                                                   |
| Wu <i>et al.</i><br>(1994) (S78)      | Cohort:<br>34,708 women (nonsmokers)<br>34 female lung cancer cases (nonsmokers)<br>Study location: USA (IA)<br>Study years: 1986-1991                                                                                                        | Highest quartile of total fat consumption    | vs. | Lowest quartile of total fat consumption  | 1.8 (0.70-4.30)  | age, occupation, physical activity, energy intake |
| Mulder <i>et al.</i><br>(2000) (S73)  | Ecological:<br>12763 men from 16 cohorts (2822 never smokers)<br>24 male lung cancer deaths (never smokers)<br>Study location: Croatia, Finland, Greece, Italy, Japan, the Netherlands, Serbia, USA<br>Study years: 1958-1987                 | Per 12g increase in total fat consumption    | vs. | No fat consumption                        | 0.96 (0.75-1.27) | average age and energy intake                     |
| <b><u>Fat (animal):</u></b>           |                                                                                                                                                                                                                                               |                                              |     |                                           |                  |                                                   |
| Wu <i>et al.</i><br>(1994) (S78)      | Cohort:<br>34,708 women (nonsmokers)<br>34 female lung cancer cases (nonsmokers)<br>Study location: USA (IA)<br>Study years: 1986-1991                                                                                                        | Highest quartile of animal fat consumption   | vs. | Lowest quartile of animal fat consumption | 1.3 (0.50-3.30)  | age, occupation, physical activity, energy intake |
| <b><u>Butter:</u></b>                 |                                                                                                                                                                                                                                               |                                              |     |                                           |                  |                                                   |
| Brennan <i>et al.</i><br>(2000) (S72) | Case-control:<br>506 male and female lung cancer cases (nonsmokers)<br>1045 male and female hospital and population controls (nonsmokers)<br>Study location: France, Germany, Italy, Spain, Sweden, United Kingdom<br>Study years: not stated | Highest tertile of butter consumption        | vs. | Lowest tertile of butter consumption      | 1.3 (0.9-1.9)    | age, gender, study center                         |
| <b><u>Fat (plant):</u></b>            |                                                                                                                                                                                                                                               |                                              |     |                                           |                  |                                                   |

|                                       |                                                                                                                                                                                                                                                        |                                                            |     |                                            |                                            |                                                      |
|---------------------------------------|--------------------------------------------------------------------------------------------------------------------------------------------------------------------------------------------------------------------------------------------------------|------------------------------------------------------------|-----|--------------------------------------------|--------------------------------------------|------------------------------------------------------|
| Wu <i>et al.</i><br>(1994) (S78)      | Cohort:<br>34,708 women (nonsmokers)<br>34 female lung cancer cases (nonsmokers)<br>Study location: USA (IA)<br>Study years: 1986-1991                                                                                                                 | Highest quartile of<br>plant fat consumption               | vs. | Lowest tertile of plant<br>fat consumption | 1.2 (0.50-2.90)                            | age, occupation, physical<br>activity, energy intake |
| <b><u>Margarine:</u></b>              |                                                                                                                                                                                                                                                        |                                                            |     |                                            |                                            |                                                      |
| Brennan <i>et al.</i><br>(2000) (S72) | Case-control:<br>506 male and female lung cancer cases<br>(nonsmokers)<br>1045 male and female hospital and population<br>controls (nonsmokers)<br>Study location: France, Germany, Italy, Spain,<br>Sweden, United Kingdom<br>Study years: not stated | Highest tertile of<br>margarine<br>consumption             | vs. | Lowest tertile of<br>margarine consumption | 0.7 (0.6-0.8)<br>P <sub>trend</sub> = 0.05 | age, gender, study center                            |
| <b><u>Fat (monounsaturated):</u></b>  |                                                                                                                                                                                                                                                        |                                                            |     |                                            |                                            |                                                      |
| Mulder <i>et al.</i><br>(2000) (S73)  | Ecological:<br>12763 men from 16 cohorts (2822 never<br>smokers)<br>24 male lung cancer deaths (never smokers)<br>Study location: Croatia, Finland, Greece, Italy,<br>Japan, the Netherlands, Serbia, USA<br>Study years: 1958-1987                    | Per 5.5g increase in<br>monounsaturated fat<br>consumption | vs. | No monounsaturated<br>fat consumption      | 0.90 (0.74-1.08)                           | average age and energy<br>intake                     |
| <b><u>Fat (polyunsaturated):</u></b>  |                                                                                                                                                                                                                                                        |                                                            |     |                                            |                                            |                                                      |
| Mulder <i>et al.</i><br>(2000) (S73)  | Ecological:<br>12763 men from 16 cohorts (2822 never<br>smokers)<br>24 male lung cancer deaths (never smokers)<br>Study location: Croatia, Finland, Greece, Italy,<br>Japan, the Netherlands, Serbia, USA<br>Study years: 1958-1987                    | Per 1.8g increase in<br>polyunsaturated fat<br>consumption | vs. | No polyunsaturated fat<br>consumption      | 1.08 (0.91-1.31)                           | average age and energy<br>intake                     |
| <b><u>Fat (saturated):</u></b>        |                                                                                                                                                                                                                                                        |                                                            |     |                                            |                                            |                                                      |
| Mulder <i>et al.</i><br>(2000) (S73)  | Ecological:<br>12763 men from 16 cohorts (2822 never<br>smokers)<br>24 male lung cancer deaths (never smokers)<br>Study location: Croatia, Finland, Greece, Italy,<br>Japan, the Netherlands, Serbia, USA                                              | Per 4.6g increase in<br>saturated fat<br>consumption       | vs. | No saturated fat<br>consumption            | 1.02 (0.89-1.17)                           | average age and energy<br>intake                     |

Study years: 1958-1987

---

**Shorting (used in cooking):**

|                                  |                                                                                                                                                     |                          |     |                                   |                           |                                                       |
|----------------------------------|-----------------------------------------------------------------------------------------------------------------------------------------------------|--------------------------|-----|-----------------------------------|---------------------------|-------------------------------------------------------|
| Hu <i>et al.</i><br>(2002) (S27) | Case-control:<br>161 female lung cancer cases (never smokers)<br>483 female population controls<br>Study location: Canada<br>Study years: 1994-1997 | Use shortning in cooking | vs. | Does not use shortning in cooking | 2.4 (1.3-4.4)<br>P = 0.04 | age, province, education, social class, energy intake |
|----------------------------------|-----------------------------------------------------------------------------------------------------------------------------------------------------|--------------------------|-----|-----------------------------------|---------------------------|-------------------------------------------------------|

---

**Fried Food:**

|                                     |                                                                                                                                                   |                                                   |     |                                                |                                                |                                    |
|-------------------------------------|---------------------------------------------------------------------------------------------------------------------------------------------------|---------------------------------------------------|-----|------------------------------------------------|------------------------------------------------|------------------------------------|
| Ozasa <i>et al.</i><br>(2001) (S77) | Cohort:<br>51588 women (never smokers)<br>101 female deaths due to lung cancer (never smokers)<br>Study location: Japan<br>Study years: 1988-1997 | Fried food consumption 2-4 times per week or more | vs. | Fried food consumption twice per month or less | 1.91 (0.98-3.72)<br>P <sub>trend</sub> = 0.057 | age, family history of lung cancer |
|-------------------------------------|---------------------------------------------------------------------------------------------------------------------------------------------------|---------------------------------------------------|-----|------------------------------------------------|------------------------------------------------|------------------------------------|

---

**French fries or fried potatoes:**

|                                  |                                                                                                                                                     |                                                          |     |                                                       |                                            |                                                       |
|----------------------------------|-----------------------------------------------------------------------------------------------------------------------------------------------------|----------------------------------------------------------|-----|-------------------------------------------------------|--------------------------------------------|-------------------------------------------------------|
| Hu <i>et al.</i><br>(2002) (S27) | Case-control:<br>161 female lung cancer cases (never smokers)<br>483 female population controls<br>Study location: Canada<br>Study years: 1994-1997 | >0.5 servings of french fries or fried potatoes per week | vs. | 0 servings of french fries or fried potatoes per week | 1.7 (1.0-3.0)<br>P <sub>trend</sub> = 0.05 | age, province, education, social class, energy intake |
|----------------------------------|-----------------------------------------------------------------------------------------------------------------------------------------------------|----------------------------------------------------------|-----|-------------------------------------------------------|--------------------------------------------|-------------------------------------------------------|

---

**Milk:**

|                     |                                                                                                                                                                       |                                     |     |                                    |     |                                       |
|---------------------|-----------------------------------------------------------------------------------------------------------------------------------------------------------------------|-------------------------------------|-----|------------------------------------|-----|---------------------------------------|
| Koo (1988)<br>(S66) | Case-control:<br>88 female lung cancer cases (never smokers)<br>137 female population controls (never smokers)<br>Study location: Hong Kong<br>Study years: 1981-1983 | Highest tertile of milk consumption | vs. | Lowest tertile of milk consumption | 1.1 | age, number of live births, schooling |
|---------------------|-----------------------------------------------------------------------------------------------------------------------------------------------------------------------|-------------------------------------|-----|------------------------------------|-----|---------------------------------------|

---

|                                        |                                                                                                                                                                                                                                               |                                                                     |     |                                               |                  |                                                                                                                                      |
|----------------------------------------|-----------------------------------------------------------------------------------------------------------------------------------------------------------------------------------------------------------------------------------------------|---------------------------------------------------------------------|-----|-----------------------------------------------|------------------|--------------------------------------------------------------------------------------------------------------------------------------|
| Nyberg <i>et al.</i><br>(1998) (S71)   | Case-control:<br>124 male and female lung cancer cases (never smokers)<br>235 male and female population controls (never smokers)<br>Study location: Sweden<br>Study years: 1989-1995                                                         | ≥2 glasses of milk daily                                            | vs. | Drink milk less than daily                    | 1.24 (0.71-2.17) | age, gender, catchment area, fruit and carrot consumption, occasional smoking, urban residence, occupational exposures, SHS exposure |
| Brennan <i>et al.</i><br>(2000) (S72)  | Case-control:<br>506 male and female lung cancer cases (nonsmokers)<br>1045 male and female hospital and population controls (nonsmokers)<br>Study location: France, Germany, Italy, Spain, Sweden, United Kingdom<br>Study years: not stated | Highest tertile of milk consumption                                 | vs. | Lowest tertile of milk consumption            | 0.8 (0.6-1.2)    | age, gender, study center                                                                                                            |
| Hu <i>et al.</i><br>(2002) (S27)       | Case-control:<br>161 female lung cancer cases (never smokers)<br>483 female population controls<br>Study location: Canada<br>Study years: 1994-1997                                                                                           | Highest quartile of milk consumption                                | vs. | Lowest quartile of milk consumption           | 1.0 (0.5-1.9)    | age, province, education, social class, energy intake                                                                                |
| Kreuzer <i>et al.</i><br>(2002) (S61)  | Case-control:<br>234 female lung cancer cases (never smokers)<br>535 female population controls (never smokers)<br>Study location: Germany<br>Study years: 1991-1996                                                                          | Daily milk consumption                                              | vs. | Less than monthly milk consumption            | 0.65 (0.44-0.95) | age, region                                                                                                                          |
| <b><u>Cultured milk or yogurt:</u></b> |                                                                                                                                                                                                                                               |                                                                     |     |                                               |                  |                                                                                                                                      |
| Nyberg <i>et al.</i><br>(1998) (S71)   | Case-control:<br>124 male and female lung cancer cases (never smokers)<br>235 male and female population controls (never smokers)<br>Study location: Sweden<br>Study years: 1989-1995                                                         | Daily or almost daily cultured milk (sour milk, yogurt) consumption | vs. | Once weekly or less cultured milk consumption | 1.61 (0.91-2.85) | age, gender, catchment area, fruit and carrot consumption, occasional smoking, urban residence, occupational exposures, SHS exposure |

|                                       |                                                                                                                                                                                                                                               |                                       |     |                                        |                                                |                                                                                                                                      |
|---------------------------------------|-----------------------------------------------------------------------------------------------------------------------------------------------------------------------------------------------------------------------------------------------|---------------------------------------|-----|----------------------------------------|------------------------------------------------|--------------------------------------------------------------------------------------------------------------------------------------|
| Kreuzer <i>et al.</i><br>(2002) (S61) | Case-control:<br>234 female lung cancer cases (never smokers)<br>535 female population controls (never smokers)<br>Study location: Germany<br>Study years: 1991-1996                                                                          | Daily curd/yogurt consumption         | vs. | Weekly or less curd/yogurt consumption | 0.53 (0.34-0.81)                               | age, region                                                                                                                          |
| <b><u>Cheese:</u></b>                 |                                                                                                                                                                                                                                               |                                       |     |                                        |                                                |                                                                                                                                      |
| Nyberg <i>et al.</i><br>(1998) (S71)  | Case-control:<br>124 male and female lung cancer cases (never smokers)<br>235 male and female population controls (never smokers)<br>Study location: Sweden<br>Study years: 1989-1995                                                         | ≥4 slices of cheese daily             | vs. | Eat cheese less than daily             | 1.21 (0.61-2.39)                               | age, gender, catchment area, fruit and carrot consumption, occasional smoking, urban residence, occupational exposures, SHS exposure |
| Brennan <i>et al.</i><br>(2000) (S72) | Case-control:<br>506 male and female lung cancer cases (nonsmokers)<br>1045 male and female hospital and population controls (nonsmokers)<br>Study location: France, Germany, Italy, Spain, Sweden, United Kingdom<br>Study years: not stated | Highest tertile of cheese consumption | vs. | Lowest tertile of cheese consumption   | 0.7 (0.5-1.0)<br>P <sub>trend</sub> = 0.01     | age, gender, study center                                                                                                            |
| Hu <i>et al.</i><br>(2002) (S27)      | Case-control:<br>161 female lung cancer cases (never smokers)<br>483 female population controls<br>Study location: Canada<br>Study years: 1994-1997                                                                                           | >3 servings of cheese daily           | vs. | 1 serving of cheese daily              | 0.6 (0.3-1.2)                                  | age, province, education, social class, energy intake                                                                                |
| Kreuzer <i>et al.</i><br>(2002) (S61) | Case-control:<br>234 female lung cancer cases (never smokers)<br>535 female population controls (never smokers)<br>Study location: Germany<br>Study years: 1991-1996                                                                          | Daily cheese consumption              | vs. | Weekly or less cheese consumption      | 0.34 (0.21-0.55)<br>P <sub>trend</sub> < 0.001 | age, region                                                                                                                          |

**Eggs:**

|                                       |                                                                                                                                                                                                                                               |                                                   |     |                                       |                                            |                                                                                                                                      |
|---------------------------------------|-----------------------------------------------------------------------------------------------------------------------------------------------------------------------------------------------------------------------------------------------|---------------------------------------------------|-----|---------------------------------------|--------------------------------------------|--------------------------------------------------------------------------------------------------------------------------------------|
| Nyberg <i>et al.</i><br>(1998) (S71)  | Case-control:<br>124 male and female lung cancer cases (never smokers)<br>235 male and female population controls (never smokers)<br>Study location: Sweden<br>Study years: 1989-1995                                                         | More than once weekly consumption of eggs         | vs. | Less than weekly consumption of eggs  | 1.22 (0.67-2.24)                           | age, gender, catchment area, fruit and carrot consumption, occasional smoking, urban residence, occupational exposures, SHS exposure |
| Brennan <i>et al.</i><br>(2000) (S72) | Case-control:<br>506 male and female lung cancer cases (nonsmokers)<br>1045 male and female hospital and population controls (nonsmokers)<br>Study location: France, Germany, Italy, Spain, Sweden, United Kingdom<br>Study years: not stated | Highest tertile of egg consumption                | vs. | Lowest tertile of egg consumption     | 0.9 (0.8-1.1)                              | age, gender, study center                                                                                                            |
| Hu <i>et al.</i><br>(2002) (S27)      | Case-control:<br>161 female lung cancer cases (never smokers)<br>483 female population controls<br>Study location: Canada<br>Study years: 1994-1997                                                                                           | Highest tertile of egg consumption                | vs. | Lowest tertile of egg consumption     | 1.8 (1.0-3.3)<br>P <sub>trend</sub> = 0.04 | age, province, education, social class, energy intake                                                                                |
| Kreuzer <i>et al.</i><br>(2002) (S61) | Case-control:<br>234 female lung cancer cases (never smokers)<br>535 female population controls (never smokers)<br>Study location: Germany<br>Study years: 1991-1996                                                                          | Daily or several times weekly consumption of eggs | vs. | Less than weekly consumption of eggs  | 0.69 (0.46-1.05)                           | age, region                                                                                                                          |
| <b><u>Cereal:</u></b>                 |                                                                                                                                                                                                                                               |                                                   |     |                                       |                                            |                                                                                                                                      |
| Hu <i>et al.</i><br>(1997) (S70)      | Case-control:<br>81 male and female lung cancer cases (never smokers)<br>115 male and female hospital controls (never smokers)<br>Study location: China (Heilongjiang)<br>Study years: 1985-1987                                              | Highest quartile of cereal consumption            | vs. | Lowest quartile of cereal consumption | 1.4 (0.6-3.3)                              | age, gender, family income                                                                                                           |

**Soy products/tofu:**



|                                            |                                                                                                                                                                                                  |                                      |     |                                       |                                               |                                                                                                             |
|--------------------------------------------|--------------------------------------------------------------------------------------------------------------------------------------------------------------------------------------------------|--------------------------------------|-----|---------------------------------------|-----------------------------------------------|-------------------------------------------------------------------------------------------------------------|
| Koo (1988)<br>(S66)                        | Case-control:<br>88 female lung cancer cases (never smokers)<br>137 female population controls (never smokers)<br>Study location: Hong Kong<br>Study years: 1981-1983                            | Highest tertile of soy intake        | vs. | Lowest tertile of soy intake          | 0.7                                           | age, number of live births, schooling                                                                       |
| Ozasa <i>et al.</i><br>(2001) (S77)        | Cohort:<br>51588 women (never smokers)<br>101 female deaths due to lung cancer (never smokers)<br>Study location: Japan<br>Study years: 1988-1997                                                | Tofu consumption almost every day    | vs. | Tofu consumption twich a week or less | 0.90 (0.53-1.53)                              | age, family history of lung cancer                                                                          |
| Seow <i>et al.</i><br>(2002) (S74)         | Case-Control:<br>176 female lung cancer cases (never smokers)<br>663 female hospitial controls (never smokers)<br>Study location: Singapore<br>Study years: 1996-1998                            | ≥5.4 servings of soy foods per week  | vs. | <2.2 servings of soy foods per week   | 0.53 (0.34-0.81)<br>P <sub>trend</sub> < 0.01 | age, birthplace, family history of cancer, soy consumption, number of live births, lengh of menstrual cycle |
| <b><u>Salt:</u></b>                        |                                                                                                                                                                                                  |                                      |     |                                       |                                               |                                                                                                             |
| Hu <i>et al.</i><br>(1997) (S70)           | Case-control:<br>81 male and female lung cancer cases (never smokers)<br>115 male and female hospital controls (never smokers)<br>Study location: China (Heilongjiang)<br>Study years: 1985-1987 | Highest quartile of salt consumption | vs. | Lowest quartile of salt consumption   | 0.2 (0.1-0.5)<br>P <sub>trend</sub> = 0.0003  | age, gender, family income                                                                                  |
| <b>Micronutrients</b>                      |                                                                                                                                                                                                  |                                      |     |                                       |                                               |                                                                                                             |
| <b><u>Vitamin A:</u></b>                   |                                                                                                                                                                                                  |                                      |     |                                       |                                               |                                                                                                             |
| Candelora <i>et al.</i><br>(1992)<br>(S68) | Case-control:<br>124 female lung cancer cases (never smokers)<br>263 female population controls (never smokers)<br>Study location: USA (FL)<br>Study years: 1987-not stated                      | Highest quartile of vitamin A intake | vs. | Lowest quartile of vitamin A intake   | 0.4 (0.20-0.80)<br>P <sub>trend</sub> = 0.008 | age, education, total calories                                                                              |

|                                         |                                                                                                                                                                                                                                               |                                        |     |                                       |                                                |                                                                                                        |
|-----------------------------------------|-----------------------------------------------------------------------------------------------------------------------------------------------------------------------------------------------------------------------------------------------|----------------------------------------|-----|---------------------------------------|------------------------------------------------|--------------------------------------------------------------------------------------------------------|
| Nyberg <i>et al.</i><br>(1998) (S71)    | Case-control:<br>124 male and female lung cancer cases (never smokers)<br>235 male and female population controls (never smokers)<br>Study location: Sweden<br>Study years: 1989-1995                                                         | Highest quintile of vitamin A intake   | vs. | Lowest quintile of vitamin A intake   | 0.95 (0.46-1.95)                               | age, gender, catchment area, occasional smoking, urban residence, occupational exposures, SHS exposure |
| <b><u>Carotenoids:</u></b>              |                                                                                                                                                                                                                                               |                                        |     |                                       |                                                |                                                                                                        |
| Candelora <i>et al.</i><br>(1992) (S68) | Case-control:<br>124 female lung cancer cases (never smokers)<br>263 female population controls (never smokers)<br>Study location: USA (FL)<br>Study years: 1987-not stated                                                                   | Highest quartile of carotenoids intake | vs. | Lowest quartile of carotenoids intake | 0.3 (0.10-0.60)<br>P <sub>trend</sub> = <0.001 | age, education, total energy intake                                                                    |
| Nyberg <i>et al.</i><br>(1998) (S71)    | Case-control:<br>124 male and female lung cancer cases (never smokers)<br>235 male and female population controls (never smokers)<br>Study location: Sweden<br>Study years: 1989-1995                                                         | Highest quintile of carotenoids intake | vs. | Lowest quintile of carotenoids intake | 0.43 (0.21-0.93)<br>P <sub>trend</sub> = 0.03  | age, gender, catchment area, occasional smoking, urban residence, occupational exposures, SHS exposure |
| Brennan <i>et al.</i><br>(2000) (S72)   | Case-control:<br>506 male and female lung cancer cases (nonsmokers)<br>1045 male and female hospital and population controls (nonsmokers)<br>Study location: France, Germany, Italy, Spain, Sweden, United Kingdom<br>Study years: not stated | Highest tertile of carotenoids intake  | vs. | Lowest tertile of carotenoids intake  | 0.8 (0.6-1.0)                                  | age, gender, study center                                                                              |
| Yuan <i>et al.</i><br>(2001) (S79)      | Case-control:<br><i>From a cohort of 18,244 men</i><br>20 male lung cancer cases (never smokers)<br>287 male cohort controls (never smokers)<br>Study location: China (Shanghai)<br>Study years: 1986-1998                                    | High serum carotenoids                 | vs. | Low serum carotenoids                 | 1.09 (0.42-2.76)                               | age, date of blood sample collection, residence area                                                   |

**Alpha-carotene:**

|                                      |                                                                                                                                                                                                            |                                           |     |                                          |                                                |                                                       |
|--------------------------------------|------------------------------------------------------------------------------------------------------------------------------------------------------------------------------------------------------------|-------------------------------------------|-----|------------------------------------------|------------------------------------------------|-------------------------------------------------------|
| Candelora <i>et al.</i> (1992) (S68) | Case-control:<br>124 female lung cancer cases (never smokers)<br>263 female population controls (never smokers)<br>Study location: USA (FL)<br>Study years: 1987-not stated                                | Highest quartile of alpha-carotene intake | vs. | Lowest quartile of alpha-carotene intake | 0.2 (0.10-0.40)<br>P <sub>trend</sub> = <0.001 | age, education, total energy intake                   |
| Yuan <i>et al.</i> (2001) (S79)      | Case-control:<br><i>From a cohort of 18,244 men</i><br>20 male lung cancer cases (never smokers)<br>287 male cohort controls (never smokers)<br>Study location: China (Shanghai)<br>Study years: 1986-1998 | High serum alpha-carotene                 | vs. | Low serum alpha-carotene                 | 0.77 (0.30-2.01)                               | age, date of blood sample collection, residence area  |
| <b><u>Beta-carotene:</u></b>         |                                                                                                                                                                                                            |                                           |     |                                          |                                                |                                                       |
| Koo (1988) (S66)                     | Case-control:<br>88 female lung cancer cases (never smokers)<br>137 female population controls (never smokers)<br>Study location: Hong Kong<br>Study years: 1981-1983                                      | Highest tertile of beta-carotene intake   | vs. | Lowest tertile of beta-carotene intake   | 0.7                                            | age, number of live births, schooling                 |
| Kalandidi <i>et al.</i> (1990) (S67) | Case-control:<br>91 female lung cancer cases (nonsmokers)<br>120 female hospital controls (nonsmokers)<br>Study location: Greece<br>Study years: 1987-1989                                                 | Highest quartile of beta-carotene intake  | vs. | Lowest quartile of beta-carotene intake  | 1.0 (0.64-1.59)                                | age, education, interviewer, total energy intake      |
| Candelora <i>et al.</i> (1992) (S68) | Case-control:<br>124 female lung cancer cases (never smokers)<br>263 female population controls (never smokers)<br>Study location: USA (FL)<br>Study years: 1987-not stated                                | Highest quartile of beta-carotene intake  | vs. | Lowest quartile of beta-carotene intake  | 0.5 (0.30-0.90)<br>P <sub>trend</sub> =        | age, education, total energy intake, vitamin C intake |
| Steinmetz <i>et al.</i> (1993) (S69) | Case-control:<br><i>From a cohort of 41,837 women</i><br>19 female lung cancer cases (never smokers)<br>1804 female cohort controls (never smokers)<br>Study location: USA (IA)<br>Study years: 1986-1989  | Highest quartile of beta-carotene intake  | vs. | Lowest quartile of beta-carotene intake  | 1.08 (0.30-3.93)                               | age, energy intake                                    |

|                                       |                                                                                                                                                                                                                                               |                                          |     |                                         |                  |                                                                                                        |
|---------------------------------------|-----------------------------------------------------------------------------------------------------------------------------------------------------------------------------------------------------------------------------------------------|------------------------------------------|-----|-----------------------------------------|------------------|--------------------------------------------------------------------------------------------------------|
| Mayne <i>et al.</i><br>(1994) (S80)   | Case-control:<br>182 male and female lung cancer cases (never smokers)<br>182 male and female population controls (never smokers)<br>Study location: USA (NY)<br>Study years: 1982-1985                                                       | 1.19mg beta-carotene per day (IQR)       |     |                                         | 0.8 (0.47-1.24)  | religion, BMI, income                                                                                  |
| Hu <i>et al.</i><br>(1997) (S70)      | Case-control:<br>81 male and female lung cancer cases (never smokers)<br>115 male and female hospital controls (never smokers)<br>Study location: China (Heilongjiang)<br>Study years: 1985-1987                                              | Highest quartile of beta-carotene intake | vs. | Lowest quartile of beta-carotene intake | 1.2 (0.5-2.7)    | age, gender, family income                                                                             |
| Nyberg <i>et al.</i><br>(1998) (S71)  | Case-control:<br>124 male and female lung cancer cases (never smokers)<br>235 male and female population controls (never smokers)<br>Study location: Sweden<br>Study years: 1989-1995                                                         | Highest quintile of beta-carotene intake | vs. | Lowest quintile of beta-carotene intake | 0.57 (0.27-1.19) | age, gender, catchment area, occasional smoking, urban residence, occupational exposures, SHS exposure |
| Brennan <i>et al.</i><br>(2000) (S72) | Case-control:<br>506 male and female lung cancer cases (nonsmokers)<br>1045 male and female hospital and population controls (nonsmokers)<br>Study location: France, Germany, Italy, Spain, Sweden, United Kingdom<br>Study years: not stated | Highest tertile of beta-carotene intake  | vs. | Lowest tertile of beta-carotene intake  | 0.8 (0.6-1.1)    | age, gender, study center                                                                              |
| Yuan <i>et al.</i><br>(2001) (S79)    | Case-control:<br><i>From a cohort of 18,244 men</i><br>20 male lung cancer cases (never smokers)<br>287 male cohort controls (never smokers)<br>Study location: China (Shanghai)<br>Study years: 1986-1998                                    | High serum beta-carotene                 | vs. | Low serum beta-carotene                 | 0.69 (0.26-1.79) | age, date of blood sample collection, residence area                                                   |

**Cryptoxanthin:**

|                                      |                                                                                                                                                                                                            |                                          |     |                                         |                                               |                                                      |
|--------------------------------------|------------------------------------------------------------------------------------------------------------------------------------------------------------------------------------------------------------|------------------------------------------|-----|-----------------------------------------|-----------------------------------------------|------------------------------------------------------|
| Candelora <i>et al.</i> (1992) (S68) | Case-control:<br>124 female lung cancer cases (never smokers)<br>263 female population controls (never smokers)<br>Study location: USA (FL)<br>Study years: 1987-not stated                                | Highest quartile of cryptoxanthin intake | vs. | Lowest quartile of cryptoxanthin intake | 0.4 (0.20-0.80)<br>P <sub>trend</sub> = 0.02  | age, education, total calories                       |
| Yuan <i>et al.</i> (2001) (S79)      | Case-control:<br><i>From a cohort of 18,244 men</i><br>20 male lung cancer cases (never smokers)<br>287 male cohort controls (never smokers)<br>Study location: China (Shanghai)<br>Study years: 1986-1998 | High serum beta-cryptoxanthin            | vs. | Low serum beta-cryptoxanthin            | 0.90 (0.31-2.60)                              | age, date of blood sample collection, residence area |
| <b><u>Lutein:</u></b>                |                                                                                                                                                                                                            |                                          |     |                                         |                                               |                                                      |
| Candelora <i>et al.</i> (1992) (S68) | Case-control:<br>124 female lung cancer cases (never smokers)<br>263 female population controls (never smokers)<br>Study location: USA (FL)<br>Study years: 1987-not stated                                | Highest quartile of lutein intake        | vs. | Lowest quartile of lutein intake        | 0.9 (0.50-1.70)                               | age, education, total calories                       |
| <b><u>Lutein and zeaxanthin:</u></b> |                                                                                                                                                                                                            |                                          |     |                                         |                                               |                                                      |
| Yuan <i>et al.</i> (2001) (S79)      | Case-control:<br><i>From a cohort of 18,244 men</i><br>20 male lung cancer cases (never smokers)<br>287 male cohort controls (never smokers)<br>Study location: China (Shanghai)<br>Study years: 1986-1998 | High serum lutein/zeaxanthin             | vs. | Low serum lutein/zeaxanthin             | 1.82 (0.71-4.65)                              | age, date of blood sample collection, residence area |
| <b><u>Retinol:</u></b>               |                                                                                                                                                                                                            |                                          |     |                                         |                                               |                                                      |
| Koo (1988) (S66)                     | Case-control:<br>88 female lung cancer cases (never smokers)<br>137 female population controls (never smokers)<br>Study location: Hong Kong<br>Study years: 1981-1983                                      | Highest tertile of retinol intake        | vs. | Lowest tertile of retinol intake        | 0.4 (0.19-0.89)<br>P <sub>trend</sub> = 0.023 | age, number of live births, education                |

|                                            |                                                                                                                                                                                                                                                        |                                          |     |                                      |                  |                                                                                                                    |
|--------------------------------------------|--------------------------------------------------------------------------------------------------------------------------------------------------------------------------------------------------------------------------------------------------------|------------------------------------------|-----|--------------------------------------|------------------|--------------------------------------------------------------------------------------------------------------------|
| Kalandidi <i>et al.</i><br>(1990) (S67)    | Case-control:<br>91 female lung cancer cases (nonsmokers)<br>120 female hospital controls (nonsmokers)<br>Study location: Greece<br>Study years: 1987-1989                                                                                             | Highest quartile of<br>retinol intake    | vs. | Lowest quartile of<br>retinol intake | 1.3 (0.98-1.77)  | age, education,<br>interviewer, total energy<br>intake                                                             |
| Candelora <i>et al.</i><br>(1992)<br>(S68) | Case-control:<br>124 female lung cancer cases (never smokers)<br>263 female population controls (never<br>smokers)<br>Study location: USA (FL)<br>Study years: 1987-not stated                                                                         | Highest quartile of<br>retinol intake    | vs. | Lowest quartile of<br>retinol intake | 1.2 (0.60-2.40)  | age, education, total<br>calories                                                                                  |
| Mayne <i>et al.</i><br>(1994) (S80)        | Case-control:<br>182 male and female lung cancer cases (never<br>smokers)<br>182 male and female population controls<br>(never smokers)<br>Study location: USA (NY)<br>Study years: 1982-1985                                                          | 116 equivalents of retinol per day (IQR) |     |                                      | 0.9 (0.66-1.19)  | religion, BMI, income                                                                                              |
| Nyberg <i>et al.</i><br>(1998) (S71)       | Case-control:<br>124 male and female lung cancer cases (never<br>smokers)<br>235 male and female population controls<br>(never smokers)<br>Study location: Sweden<br>Study years: 1989-1995                                                            | Highest quintile of<br>retinol intake    | vs. | Lowest quintile of<br>retinol intake | 1.27 (0.62-1.61) | age, gender, catchment<br>area, occasional smoking,<br>urban residence,<br>occupational exposures,<br>SHS exposure |
| Brennan <i>et al.</i><br>(2000) (S72)      | Case-control:<br>506 male and female lung cancer cases<br>(nonsmokers)<br>1045 male and female hospital and population<br>controls (nonsmokers)<br>Study location: France, Germany, Italy, Spain,<br>Sweden, United Kingdom<br>Study years: not stated | Highest tertile of<br>retinol intake     | vs. | Lowest tertile of retinol<br>intake  | 0.9 (0.7-1.1)    | age, gender, study center                                                                                          |

|                                            |                                                                                                                                                                                                            |                                      |     |                                     |                                               |                                                      |
|--------------------------------------------|------------------------------------------------------------------------------------------------------------------------------------------------------------------------------------------------------------|--------------------------------------|-----|-------------------------------------|-----------------------------------------------|------------------------------------------------------|
| Yuan <i>et al.</i><br>(2001) (S80)         | Case-control:<br><i>From a cohort of 18,244 men</i><br>20 male lung cancer cases (never smokers)<br>287 male cohort controls (never smokers)<br>Study location: China (Shanghai)<br>Study years: 1986-1998 | High serum retinol                   | vs. | Low serum retinol                   | 0.75 (0.27-2.07)                              | age, date of blood sample collection, residence area |
| <b><u>Vitamin C:</u></b>                   |                                                                                                                                                                                                            |                                      |     |                                     |                                               |                                                      |
| Koo (1988)<br>(S66)                        | Case-control:<br>88 female lung cancer cases (never smokers)<br>137 female population controls (never smokers)<br>Study location: Hong Kong<br>Study years: 1981-1983                                      | Highest tertile of vitamin C intake  | vs. | Lowest tertile of vitamin C intake  | 0.5 (0.22-0.98)<br>P <sub>trend</sub> = 0.015 | age, number of live births, education                |
| Kalandidi <i>et al.</i><br>(1990) (S67)    | Case-control:<br>91 female lung cancer cases (nonsmokers)<br>120 female hospital controls (nonsmokers)<br>Study location: Greece<br>Study years: 1987-1989                                                 | Highest quartile of vitamin C intake | vs. | Lowest quartile of vitamin C intake | 0.7 (0.42-1.05)                               | age, education, interviewer, total energy intake     |
| Candelora <i>et al.</i><br>(1992)<br>(S68) | Case-control:<br>124 female lung cancer cases (never smokers)<br>263 female population controls (never smokers)<br>Study location: USA (FL)<br>Study years: 1987-not stated                                | Highest quartile of vitamin C intake | vs. | Lowest quartile of vitamin C intake | 0.5 (0.30-1.00)<br>P <sub>trend</sub> = 0.008 | age, education, total calories                       |
| Hu <i>et al.</i><br>(1997) (S70)           | Case-control:<br>81 male and female lung cancer cases (never smokers)<br>115 male and female hospital controls (never smokers)<br>Study location: China (Heilongjiang)<br>Study years: 1985-1987           | Highest quartile of vitamin C intake | vs. | Lowest quartile of vitamin C intake | 0.5 (0.2-1.2)                                 | age, gender, family income                           |

|                                         |                                                                                                                                                                                                            |                                         |     |                                        |                  |                                                                                                                    |
|-----------------------------------------|------------------------------------------------------------------------------------------------------------------------------------------------------------------------------------------------------------|-----------------------------------------|-----|----------------------------------------|------------------|--------------------------------------------------------------------------------------------------------------------|
| Nyberg <i>et al.</i><br>(1998) (S71)    | Case-control:<br>124 male and female lung cancer cases (never smokers)<br>235 male and female population controls (never smokers)<br>Study location: Sweden<br>Study years: 1989-1995                      | Highest quintile of<br>vitamin C intake | vs. | Lowest quintile of<br>vitamin C intake | 1.14 (0.53-2.45) | age, gender, catchment<br>area, occasional smoking,<br>urban residence,<br>occupational exposures,<br>SHS exposure |
| <b><u>Vitamin E:</u></b>                |                                                                                                                                                                                                            |                                         |     |                                        |                  |                                                                                                                    |
| Hu <i>et al.</i><br>(1997) (S70)        | Case-control:<br>81 male and female lung cancer cases (never smokers)<br>115 male and female hospital controls (never smokers)<br>Study location: China (Heilongjiang)<br>Study years: 1985-1987           | Highest quartile of<br>vitamin E intake | vs. | Lowest quartile of<br>vitamin E intake | 0.9 (0.4-2.0)    | age, gender, family<br>income                                                                                      |
| <b><u>Total tocopherols:</u></b>        |                                                                                                                                                                                                            |                                         |     |                                        |                  |                                                                                                                    |
| Yuan <i>et al.</i><br>(2001) (S79)      | Case-control:<br><i>From a cohort of 18,244 men</i><br>20 male lung cancer cases (never smokers)<br>287 male cohort controls (never smokers)<br>Study location: China (Shanghai)<br>Study years: 1986-1998 | High serum<br>tocopherols               | vs. | Low serum tocopherols                  | 0.90 (0.36-2.25) | age, date of blood sample<br>collection, residence area                                                            |
| <b><u>Gamma-tocopherol:</u></b>         |                                                                                                                                                                                                            |                                         |     |                                        |                  |                                                                                                                    |
| Yuan <i>et al.</i><br>(2001) (S79)      | Case-control:<br><i>From a cohort of 18,244 men</i><br>20 male lung cancer cases (never smokers)<br>287 male cohort controls (never smokers)<br>Study location: China (Shanghai)<br>Study years: 1986-1998 | High serum gamma-<br>tocopherol         | vs. | Low serum gamma-<br>tocopherol         | 1.42 (0.56-3.61) | age, date of blood sample<br>collection, residence area                                                            |
| <b><u>Lycopene:</u></b>                 |                                                                                                                                                                                                            |                                         |     |                                        |                  |                                                                                                                    |
| Candelora <i>et al.</i> (1992)<br>(S68) | Case-control:<br>124 female lung cancer cases (never smokers)<br>263 female population controls (never smokers)<br>Study location: USA (FL)<br>Study years: 1987-not stated                                | Highest quartile of<br>lycopene intake  | vs. | Lowest quartile of<br>lycopene intake  | 0.6 (0.30-1.20)  | age, education, total<br>calories                                                                                  |



|                                    |                                                                                                                                                                                                            |                     |     |                    |                  |                                                      |
|------------------------------------|------------------------------------------------------------------------------------------------------------------------------------------------------------------------------------------------------------|---------------------|-----|--------------------|------------------|------------------------------------------------------|
| Yuan <i>et al.</i><br>(2001) (S79) | Case-control:<br><i>From a cohort of 18,244 men</i><br>20 male lung cancer cases (never smokers)<br>287 male cohort controls (never smokers)<br>Study location: China (Shanghai)<br>Study years: 1986-1998 | High serum lycopene | vs. | Low serum lycopene | 0.65 (0.23-1.83) | age, date of blood sample collection, residence area |
|------------------------------------|------------------------------------------------------------------------------------------------------------------------------------------------------------------------------------------------------------|---------------------|-----|--------------------|------------------|------------------------------------------------------|

---

#### Abbreviations

CI confidence interval  
SHS secondhand smoke  
BMI body mass index  
IQR interquartile range

Supplemental Table 11: Results of studies on use of hormone replacement therapy and risk of lung cancer among never smokers

| Study                               | Design/population                                                                                                                                                                                          | Exposure Group                                                                    | Reference Group                                                                          | Risk Estimate (95% CI) | Adjustment Variables                              |
|-------------------------------------|------------------------------------------------------------------------------------------------------------------------------------------------------------------------------------------------------------|-----------------------------------------------------------------------------------|------------------------------------------------------------------------------------------|------------------------|---------------------------------------------------|
| Olsson <i>et al.</i> (2003) (S81)   | Cohort:<br>8416 women who experienced a natural menopause (4052 never smokers)<br>8 trachea and lung cancer cases (number of never smokers not stated)<br>Study location: Sweden<br>Study years: 1990-1999 | Incidence of lung cancer among never-smoking women in cohort who never used HRT   | vs. Incidence of lung cancer among never-smoking women in the general Swedish population | 0.23 (0.08-0.55)       | age, calendar period                              |
|                                     |                                                                                                                                                                                                            | Incidence of lung cancer among never-smoking women in cohort who ever used HRT    | vs. Incidence of lung cancer among never-smoking women in the general Swedish population | 0.21 (0.01-1.19)       | age, calendar period                              |
|                                     |                                                                                                                                                                                                            | SIR of lung cancer among never-smoking women in cohort who ever used HRT          | vs. SIR of lung cancer among never-smoking women in cohort who never used HRT            | 0.91                   | age, calendar period                              |
| Schabath <i>et al.</i> (2004) (S82) | Case-control:<br>86 female lung cancer cases (never smokers)<br>138 female hospital controls (never smokers)<br>Study location: USA (TX)<br>Study years: not stated                                        | HRT use in the past 6 months                                                      | vs. No HRT use in the past 6 months                                                      | 0.72 (0.37-1.40)       | age, BMI, education, ethnicity, menopausal status |
| Liu <i>et al.</i> (2005) (S83)      | Cohort:<br>44677 never-smoking women (26197 post-menopausal)<br>153 lung cancer cases (83 post-menopausal)<br>Study location: Japan<br>Study years: 1990-2002                                              | Women who experienced natural menopause and ever used HRT (all lung cancer types) | vs. Women who experienced natural menopause and never used HRT (all lung cancer types)   | 1.19 (0.60-2.33)       | age, SHS exposure, study center                   |
|                                     |                                                                                                                                                                                                            | Women with induced menopause and ever used HRT (all lung cancer types)            | vs. Women who experienced natural menopause and never used HRT (all lung cancer types)   | 2.40 (1.07-5.40)       | age, SHS exposure, study center                   |
|                                     |                                                                                                                                                                                                            | Women who experienced natural menopause and ever used HRT (adenocarcinomas)       | vs. Women who experienced natural menopause and never used HRT (adenocarcinomas)         | 1.23 (0.59-2.58)       | age, SHS exposure, study center                   |
|                                     |                                                                                                                                                                                                            | Women with induced menopause and ever used HRT (adenocarcinomas)                  | vs. Women who experienced natural menopause and never used HRT (adenocarcinomas)         | 2.71 (1.12-6.58)       | age, SHS exposure, study center                   |
|                                     |                                                                                                                                                                                                            | All post-menopausal women who ever used HRT                                       | vs. All post-menopausal women who never used HRT                                         | 1.45 (0.84-2.49)       | age, SHS exposure, study center                   |

Abbreviations:

CI confidence interval

HRT hormone replacement therapy

BMI body mass index

SHS secondhand smoke

Supplemental Table 12: Results of studies on human papillomavirus (HPV) infection and risk of lung cancer among never smokers

| Study                            | Design/population                                                                                                                                                                                                          | Exposure Group                                                  | Reference Group                           | Risk Estimate (95% CI) | Adjustment Variables         |
|----------------------------------|----------------------------------------------------------------------------------------------------------------------------------------------------------------------------------------------------------------------------|-----------------------------------------------------------------|-------------------------------------------|------------------------|------------------------------|
| Cheng <i>et al.</i> (2001) (S84) | Case-control:<br>78 male and female non-small cell lung cancer cases (never smokers)<br>48 male and female hospital controls (never smokers)<br>Study location: Taiwan<br>Study years: not stated                          | <u>Males:</u>                                                   |                                           |                        |                              |
|                                  |                                                                                                                                                                                                                            | Lung tissues positive for HPV type 16                           | vs. Lung tissues negative for HPV type 16 | 1.77 (0.48-6.50)       | age, tumor type, tumor stage |
|                                  |                                                                                                                                                                                                                            | Lung tissues positive for HPV type 18                           | vs. Lung tissues negative for HPV type 18 | 2.30 (0.61-8.68)       | age, tumor type, tumor stage |
|                                  |                                                                                                                                                                                                                            | <u>Females:</u>                                                 |                                           |                        |                              |
|                                  |                                                                                                                                                                                                                            | Lung tissues positive for HPV type 16                           | vs. Lung tissues negative for HPV type 16 | 3.98 (1.13-13.98)      | age, tumor type, tumor stage |
|                                  |                                                                                                                                                                                                                            | Lung tissues positive for HPV type 18                           | vs. Lung tissues negative for HPV type 18 | 11.66 (2.94-46.27)     | age, tumor type, tumor stage |
| Chiou <i>et al.</i> (2003) (S85) | Case-control:<br>74 male and female lung cancer cases (nonsmokers)<br>107 male and female hospital controls (nonsmokers)<br>Study location: Taiwan<br>Study years: not stated                                              | <u>Males:</u>                                                   |                                           |                        |                              |
|                                  |                                                                                                                                                                                                                            | Venous blood positive for HPV type 16                           | vs. Venous blood negative for HPV type 16 | 4.0 (1.1-15.3)         | age                          |
|                                  |                                                                                                                                                                                                                            | Venous blood positive for HPV type 18                           | vs. Venous blood negative for HPV type 18 | 5.1 (1.2-20.6)         | age                          |
|                                  |                                                                                                                                                                                                                            | <u>Females:</u>                                                 |                                           |                        |                              |
|                                  |                                                                                                                                                                                                                            | Venous blood positive for HPV type 16                           | vs. Venous blood negative for HPV type 16 | 13.6 (5.3-35.3)        | age                          |
|                                  |                                                                                                                                                                                                                            | Venous blood positive for HPV type 18                           | vs. Venous blood negative for HPV type 18 | 7.1 (1.9-26.5)         | age                          |
| Cheng <i>et al.</i> (2004) (S86) | Case-control:<br>141 male and female non-small cell lung cancer cases (77 never smokers)<br>60 male and female hospital controls (number of never smokers not stated)<br>Study location: Taiwan<br>Study years: not stated | Males with lung tissues positive for HPV type 6 (never smokers) | vs. Never-smoking females                 | 3.93 (1.17-13.12)      | age, tumor type, tumor stage |

Abbreviations:

CI confidence interval

HPV human papillomavirus

## References:

- S1. Lam TH, Kung IT, Wong CM, *et al.* Smoking, passive smoking and histological types in lung cancer in Hong Kong Chinese women. *British journal of cancer* 1987;56: 673-8.
- S2. Anton-Culver H, Culver BD, Kurosaki T, Osann KE, Lee JB. Incidence of lung cancer by histological type from a population-based registry. *Cancer research* 1988;48: 6580-3.
- S3. Lam TH, Ho SY, Hedley AJ, Mak KH, Peto R. Mortality and smoking in Hong Kong: case-control study of all adult deaths in 1998. *BMJ (Clinical research ed)* 2001;323: 361.
- S4. Radzikowska E, Glaz P, Roszkowski K. Lung cancer in women: age, smoking, histology, performance status, stage, initial treatment and survival. Population-based study of 20 561 cases. *Ann Oncol* 2002;13: 1087-93.
- S5. Yun YH, Lim MK, Jung KW, *et al.* Relative and absolute risks of cigarette smoking on major histologic types of lung cancer in Korean men. *Cancer Epidemiol Biomarkers Prev* 2005;14: 2125-30.
- S6. Liam CK, Pang YK, Leow CH, Poosparajah S, Menon A. Changes in the distribution of lung cancer cell types and patient demography in a developing multiracial Asian country: experience of a university teaching hospital. *Lung cancer (Amsterdam, Netherlands)* 2006;53: 23-30.
- S7. Lan Q, Chen W, Chen H, He XZ. Risk factors for lung cancer in non-smokers in Xuanwei County of China. *Biomed Environ Sci* 1993;6: 112-8.
- S8. Dai XD, Lin CY, Sun XW, Shi YB, Lin YJ. The etiology of lung cancer in nonsmoking females in Harbin, China. *Lung cancer (Amsterdam, Netherlands)* 1996;14 Suppl 1: S85-91.
- S9. Wang TJ, Zhou BS, Shi JP. Lung cancer in nonsmoking Chinese women: a case-control study. *Lung cancer (Amsterdam, Netherlands)* 1996;14 Suppl 1: S93-8.
- S10. Ko YC, Lee CH, Chen MJ, *et al.* Risk factors for primary lung cancer among non-smoking women in Taiwan. *International journal of epidemiology* 1997;26: 24-31.
- S11. Shen XB, Wang GX, Zhou BS. Relation of exposure to environmental tobacco smoke and pulmonary adenocarcinoma in non-smoking women: a case control study in Nanjing. *Oncology reports* 1998;5: 1221-3.
- S12. Zhong L, Goldberg MS, Gao YT, Jin F. Lung cancer and indoor air pollution arising from Chinese-style cooking among nonsmoking women living in Shanghai, China. *Epidemiology (Cambridge, Mass)* 1999;10: 488-94.
- S13. Lissowska J, Bardin-Mikolajczak A, Fletcher T, *et al.* Lung cancer and indoor pollution from heating and cooking with solid fuels: the IARC international multicentre case-control study in Eastern/Central Europe and the United Kingdom. *American journal of epidemiology* 2005;162: 326-33.
- S14. Pisani P, Srivatanakul P, Randerson-Moor J, *et al.* GSTM1 and CYP1A1 polymorphisms, tobacco, air pollution, and lung cancer: a study in rural Thailand. *Cancer Epidemiol Biomarkers Prev* 2006;15: 667-74.
- S15. Sapkota A, Gajalakshmi V, Jetly DH, *et al.* Indoor air pollution from solid fuels and risk of hypopharyngeal/laryngeal and lung cancers: a multicentric case-control study from India. *International journal of epidemiology* 2008;37: 321-8.
- S16. Sobue T. Association of indoor air pollution and lifestyle with lung cancer in Osaka, Japan. *International journal of epidemiology* 1990;19 Suppl 1: S62-6.
- S17. Hernandez-Garduno E, Brauer M, Perez-Neria J, Vedal S. Wood smoke exposure and lung adenocarcinoma in non-smoking Mexican women. *Int J Tuberc Lung Dis* 2004;8: 377-83.
- S18. Behera D, Balamugesh T. Indoor air pollution as a risk factor for lung cancer in women. *The Journal of the Association of Physicians of India* 2005;53: 190-2.
- S19. Ko YC, Cheng LS, Lee CH, *et al.* Chinese food cooking and lung cancer in women nonsmokers. *American journal of epidemiology* 2000;151: 140-7.

- S20. Seow A, Poh WT, Teh M, *et al.* Fumes from meat cooking and lung cancer risk in Chinese women. *Cancer Epidemiol Biomarkers Prev* 2000;9: 1215-21.
- S21. Yu IT, Chiu YL, Au JS, Wong TW, Tang JL. Dose-response relationship between cooking fumes exposures and lung cancer among Chinese nonsmoking women. *Cancer research* 2006;66: 4961-7.
- S22. Morabia A, Markowitz S, Garibaldi K, Wynder EL. Lung cancer and occupation: results of a multicentre case-control study. *British journal of industrial medicine* 1992;49: 721-7.
- S23. Bovenzi M, Stanta G, Antiga G, Peruzzo P, Cavallieri F. Occupational exposure and lung cancer risk in a coastal area of northeastern Italy. *International archives of occupational and environmental health* 1993;65: 35-41.
- S24. Brownson RC, Alavanja MC, Chang JC. Occupational risk factors for lung cancer among nonsmoking women: a case-control study in Missouri (United States). *Cancer Causes Control* 1993;4: 449-54.
- S25. Wu-Williams AH, Xu ZY, Blot WJ, *et al.* Occupation and lung cancer risk among women in northern China. *American journal of industrial medicine* 1993;24: 67-79.
- S26. Muscat JE, Stellman SD, Wynder EL. Insulation, asbestos, smoking habits, and lung cancer cell types. *American journal of industrial medicine* 1995;27: 257-69.
- S27. Hu J, Mao Y, Dryer D, White K. Risk factors for lung cancer among Canadian women who have never smoked. *Cancer detection and prevention* 2002;26: 129-38.
- S28. Hammond EC, Selikoff IJ, Seidman H. Asbestos exposure, cigarette smoking and death rates. *Annals of the New York Academy of Sciences* 1979;330: 473-90.
- S29. Selikoff IJ, Seidman H, Hammond EC. Mortality effects of cigarette smoking among amosite asbestos factory workers. *Journal of the National Cancer Institute* 1980;65: 507-13.
- S30. Berry G, Newhouse ML, Antonis P. Combined effect of asbestos and smoking on mortality from lung cancer and mesothelioma in factory workers. *British journal of industrial medicine* 1985;42: 12-8.
- S31. Cheng WN, Kong J. A retrospective mortality cohort study of chrysotile asbestos products workers in Tianjin 1972-1987. *Environmental research* 1992;59: 271-8.
- S32. McDonald JC, Liddell FD, Dufresne A, McDonald AD. The 1891-1920 birth cohort of Quebec chrysotile miners and millers: mortality 1976-88. *British journal of industrial medicine* 1993;50: 1073-81.
- S33. Zhu H, Wang Z. Study of occupational lung cancer in asbestos factories in China. *British journal of industrial medicine* 1993;50: 1039-42.
- S34. Meurman LO, Pukkala E, Hakama M. Incidence of cancer among anthophyllite asbestos miners in Finland. *Occupational and environmental medicine* 1994;51: 421-5.
- S35. Liddell FD, Armstrong BG. The combination of effects on lung cancer of cigarette smoking and exposure in quebec chrysotile miners and millers. *The Annals of occupational hygiene* 2002;46: 5-13.
- S36. Liddell FD. The interaction of asbestos and smoking in lung cancer. *The Annals of occupational hygiene* 2001;45: 341-56.
- S37. Pinto SS, Henderson V, Enterline PE. Mortality experience of arsenic-exposed workers. *Archives of environmental health* 1978;33: 325-31.
- S38. Higgins I, Welch K, Oh M, Bond G, Hurwitz P. Influence of arsenic exposure and smoking on lung cancer among smelter workers: a pilot study. *American journal of industrial medicine* 1981;2: 33-41.
- S39. Pershagen G, Wall S, Taube A, Linnman L. On the interaction between occupational arsenic exposure and smoking and its relationship to lung cancer. *Scandinavian journal of work, environment & health* 1981;7: 302-9.
- S40. Welch K, Higgins I, Oh M, Burchfiel C. Arsenic exposure, smoking, and respiratory cancer in copper smelter workers. *Archives of environmental health* 1982;37: 325-35.
- S41. Tsuda T, Nagira T, Yamamoto M, Kume Y. An epidemiological study on cancer in certified arsenic poisoning patients in Toroku. *Industrial health* 1990;28: 53-62.

- S42. Jarup L, Pershagen G. Arsenic exposure, smoking, and lung cancer in smelter workers--a case-control study. *American journal of epidemiology* 1991;134: 545-51.
- S43. Hazelton WD, Luebeck EG, Heidenreich WF, Moolgavkar SH. Analysis of a historical cohort of Chinese tin miners with arsenic, radon, cigarette smoke, and pipe smoke exposures using the biologically based two-stage clonal expansion model. *Radiation research* 2001;156: 78-94.
- S44. Besso A, Nyberg F, Pershagen G. Air pollution and lung cancer mortality in the vicinity of a nonferrous metal smelter in Sweden. *International journal of cancer* 2003;107: 448-52.
- S45. Forastiere F, Lagorio S, Michelozzi P, *et al.* Silica, silicosis and lung cancer among ceramic workers: a case-referent study. *American journal of industrial medicine* 1986;10: 363-70.
- S46. Mastrangelo G, Zambon P, Simonato L, Rizzi P. A case-referent study investigating the relationship between exposure to silica dust and lung cancer. *International archives of occupational and environmental health* 1988;60: 299-302.
- S47. Siemiatycki J, Gerin M, Dewar R, Lakhani R, Begin D, Richardson L. Silica and cancer associations from a multicancer occupational exposure case-referent study. *IARC scientific publications* 1990: 29-42.
- S48. Zeka A, Mannetje A, Zaridze D, *et al.* Lung cancer and occupation in nonsmokers: a multicenter case-control study in Europe. *Epidemiology (Cambridge, Mass)* 2006;17: 615-23.
- S49. Zambon P, Simonato L, Mastrangelo G, Winkelmann R, Saia B, Crepet M. Mortality of workers compensated for silicosis during the period 1959-1963 in the Veneto region of Italy. *Scandinavian journal of work, environment & health* 1987;13: 118-23.
- S50. Chiyotani K, *al.* E. Lung cancer risk among pneumoconiosis patients in Japan, with special reference to silicotics. In: Simonato L, ACFRS, Thomas TL, editors. *Occupational exposure to silica and cancer risk*. Lyon: International Agency for Research on Cancer; 1990. p. 95-104.
- S51. Hessel PA, Sluis-Cremer GK, Hnizdo E. Silica exposure, silicosis, and lung cancer: a necropsy study. *British journal of industrial medicine* 1990;47: 4-9.
- S52. Amandus H, Costello J. Silicosis and lung cancer in U.S. metal miners. *Archives of environmental health* 1991;46: 82-9.
- S53. Amandus HE, Shy C, Wing S, Blair A, Heineman EF. Silicosis and lung cancer in North Carolina dusty trades workers. *American journal of industrial medicine* 1991;20: 57-70.
- S54. Carta P, Cocco PL, Casula D. Mortality from lung cancer among Sardinian patients with silicosis. *British journal of industrial medicine* 1991;48: 122-9.
- S55. Chia SE, Chia KS, Phoon WH, Lee HP. Silicosis and lung cancer among Chinese granite workers. *Scandinavian journal of work, environment & health* 1991;17: 170-4.
- S56. Partanen T, Pukkala E, Vainio H, Kurppa K, Koskinen H. Increased incidence of lung and skin cancer in Finnish silicotic patients. *J Occup Med* 1994;36: 616-22.
- S57. Dong D, Xu G, Sun Y, Hu P. Lung cancer among workers exposed to silica dust in Chinese refractory plants. *Scandinavian journal of work, environment & health* 1995;21 Suppl 2: 69-72.
- S58. Wang Z, Dong D, Liang X, Qu G, Wu J, Xu X. Cancer mortality among silicotics in China's metallurgical industry. *International journal of epidemiology* 1996;25: 913-7.
- S59. Pohlabeln H, Boffetta P, Ahrens W, *et al.* Occupational risks for lung cancer among nonsmokers. *Epidemiology (Cambridge, Mass)* 2000;11: 532-8.
- S60. Kreuzer M, Gerken M, Kreienbrock L, Wellmann J, Wichmann HE. Lung cancer in lifetime nonsmoking men - results of a case-control study in Germany. *British journal of cancer* 2001;84: 134-40.
- S61. Kreuzer M, Heinrich J, Kreienbrock L, Rosario AS, Gerken M, Wichmann HE. Risk factors for lung cancer among nonsmoking women. *International journal of cancer* 2002;100: 706-13.
- S62. Hrubec Z, Blair A, Rogot E, Vaught J. Mortality risks by occupation among US veterans of known smoking status: 1954-1980. In: *National Institutes of Health B, MD, editor. NIH; 1992.*
- S63. Keller JE, Howe HL. Risk factors for lung cancer among nonsmoking Illinois residents. *Environmental research* 1993;60: 1-11.

- S64. Nyberg F, Gustavsson P, Jarup L, *et al.* Urban air pollution and lung cancer in Stockholm. *Epidemiology (Cambridge, Mass)* 2000;11: 487-95.
- S65. Pope CA, 3rd, Burnett RT, Thun MJ, *et al.* Lung cancer, cardiopulmonary mortality, and long-term exposure to fine particulate air pollution. *Jama* 2002;287: 1132-41.
- S66. Koo LC. Dietary habits and lung cancer risk among Chinese females in Hong Kong who never smoked. *Nutrition and cancer* 1988;11: 155-72.
- S67. Kalandidi A, Katsouyanni K, Vorpoulou N, Bastas G, Saracci R, Trichopoulos D. Passive smoking and diet in the etiology of lung cancer among non-smokers. *Cancer Causes Control* 1990;1: 15-21.
- S68. Candelora EC, Stockwell HG, Armstrong AW, Pinkham PA. Dietary intake and risk of lung cancer in women who never smoked. *Nutrition and cancer* 1992;17: 263-70.
- S69. Steinmetz KA, Potter JD, Folsom AR. Vegetables, fruit, and lung cancer in the Iowa Women's Health Study. *Cancer research* 1993;53: 536-43.
- S70. Hu J, Johnson KC, Mao Y, *et al.* A case-control study of diet and lung cancer in northeast China. *International journal of cancer* 1997;71: 924-31.
- S71. Nyberg F, Agrenius V, Svartengren K, Svensson C, Pershagen G. Dietary factors and risk of lung cancer in never-smokers. *International journal of cancer* 1998;78: 430-6.
- S72. Brennan P, Fortes C, Butler J, *et al.* A multicenter case-control study of diet and lung cancer among non-smokers. *Cancer Causes Control* 2000;11: 49-58.
- S73. Mulder I, Jansen MC, Smit HA, *et al.* Role of smoking and diet in the cross-cultural variation in lung-cancer mortality: the Seven Countries Study. Seven Countries Study Research Group. *International journal of cancer* 2000;88: 665-71.
- S74. Seow A, Poh WT, Teh M, *et al.* Diet, reproductive factors and lung cancer risk among Chinese women in Singapore: evidence for a protective effect of soy in nonsmokers. *International journal of cancer* 2002;97: 365-71.
- S75. Liu Y, Sobue T, Otani T, Tsugane S. Vegetables, fruit consumption and risk of lung cancer among middle-aged Japanese men and women: JPHC study. *Cancer Causes Control* 2004;15: 349-57.
- S76. Galeone C, Negri E, Pelucchi C, La Vecchia C, Bosetti C, Hu J. Dietary intake of fruit and vegetable and lung cancer risk: a case-control study in Harbin, northeast China. *Ann Oncol* 2007;18: 388-92.
- S77. Ozasa K, Watanabe Y, Ito Y, *et al.* Dietary habits and risk of lung cancer death in a large-scale cohort study (JACC Study) in Japan by sex and smoking habit. *Jpn J Cancer Res* 2001;92: 1259-69.
- S78. Wu Y, Zheng W, Sellers TA, Kushi LH, Bostick RM, Potter JD. Dietary cholesterol, fat, and lung cancer incidence among older women: the Iowa Women's Health Study (United States). *Cancer Causes Control* 1994;5: 395-400.
- S79. Yuan JM, Ross RK, Chu XD, Gao YT, Yu MC. Prediagnostic levels of serum beta-cryptoxanthin and retinol predict smoking-related lung cancer risk in Shanghai, China. *Cancer Epidemiol Biomarkers Prev* 2001;10: 767-73.
- S80. Mayne ST, Buenconsejo J, Janerich DT. Familial cancer history and lung cancer risk in United States nonsmoking men and women. *Cancer Epidemiol Biomarkers Prev* 1999;8: 1065-9.
- S81. Olsson H, Bladstrom A, Ingvar C. Are smoking-associated cancers prevented or postponed in women using hormone replacement therapy? *Obstetrics and gynecology* 2003;102: 565-70.
- S82. Schabath MB, Wu X, Vassilopoulou-Sellin R, Vaporciyan AA, Spitz MR. Hormone replacement therapy and lung cancer risk: a case-control analysis. *Clin Cancer Res* 2004;10: 113-23.
- S83. Liu Y, Inoue M, Sobue T, Tsugane S. Reproductive factors, hormone use and the risk of lung cancer among middle-aged never-smoking Japanese women: a large-scale population-based cohort study. *International journal of cancer* 2005;117: 662-6.
- S84. Cheng YW, Chiou HL, Sheu GT, *et al.* The association of human papillomavirus 16/18 infection with lung cancer among nonsmoking Taiwanese women. *Cancer research* 2001;61: 2799-803.



S85. Chiou HL, Wu MF, Liaw YC, *et al.* The presence of human papillomavirus type 16/18 DNA in blood circulation may act as a risk marker of lung cancer in Taiwan. *Cancer* 2003;97: 1558-63.

S86. Cheng YW, Chiou HL, Chen JT, *et al.* Gender difference in human papillomavirus infection for non-small cell lung cancer in Taiwan. *Lung cancer (Amsterdam, Netherlands)* 2004;46: 165-70.
